# Supplementary material
Source: PubMed Central journal article supplement (PMC5667676)
Supplement: NIHMS889792-supplement-Supplement1.pdf [file NIHMS889792-supplement-Supplement1.pdf]

## Supplementary Appendix

This appendix has been provided by the authors to give readers additional information about their work.

Supplement to: Paterno E, Huybrechts KF, Bateman BT, et al. Lithium use in pregnancy and the risk of cardiac malformations. *N Engl J Med* 2017;376:2245-54. DOI: [10.1056/NEJMoa1612222](https://doi.org/10.1056/NEJMoa1612222)

## **Appendix: Lithium Use in Pregnancy and the Risk of Cardiac Malformations**

Elisabetta Patorno, M.D., Dr.P.H.

Krista F. Huybrechts, Ph.D.

Brian T. Bateman, M.D.

Jacqueline M. Cohen, Ph.D.

Rishi J. Desai, Ph.D.

Helen Mogun, M.S.

Lee S. Cohen, M.D.

Sonia Hernandez-Diaz, M.D., Dr.P.H.

## Table of Contents

|                                                                                                                                                                                                                                                                                     |    |
|-------------------------------------------------------------------------------------------------------------------------------------------------------------------------------------------------------------------------------------------------------------------------------------|----|
| Figure S1. Absolute and relative risk of cardiac malformations among lithium-exposed and lamotrigine-exposed infants as compared with unexposed infants, stratified according to tertiles of the highest prescribed daily dose filled by the mother during the first trimester..... | 4  |
| Table S1. Studies evaluating the association between lithium exposure during pregnancy and the risk of cardiac malformations.....                                                                                                                                                   | 5  |
| Table S2. Unadjusted and propensity-score-adjusted baseline characteristics of lithium-exposed and unexposed pregnant women.....                                                                                                                                                    | 8  |
| Table S3. Unadjusted and propensity-score-adjusted baseline characteristics of lamotrigine-exposed and unexposed pregnant women.....                                                                                                                                                | 11 |
| Table S4. Unadjusted and propensity-score-adjusted baseline characteristics of lithium- and lamotrigine-exposed pregnant women, with lamotrigine serving as the active reference group.....                                                                                         | 14 |
| Table S5. Absolute and risk difference of cardiac, non-cardiac, and overall malformations among infants exposed to lithium during the first trimester as compared with lamotrigine-exposed or unexposed infants .....                                                               | 17 |
| Table S6. Unadjusted baseline characteristics of exposed and unexposed pregnant women by dose tertiles of the first lithium prescription filled during the first trimester .....                                                                                                    | 18 |
| Table S7. Propensity-score-adjusted baseline characteristics of exposed and unexposed pregnant women by dose tertiles of the first lithium prescription filled during the first trimester .....                                                                                     | 21 |
| Table S8. Unadjusted baseline characteristics of exposed and unexposed pregnant women by dose tertiles of the first lamotrigine prescription filled during the first trimester.....                                                                                                 | 24 |
| Table S9. Propensity-score-adjusted baseline characteristics of exposed and unexposed pregnant women by dose tertiles of the first lamotrigine prescription filled during the first trimester .....                                                                                 | 27 |
| Table S10. Unadjusted baseline characteristics of exposed and unexposed pregnant women by dose tertiles of the highest lithium prescription filled during the first trimester .....                                                                                                 | 30 |
| Table S11. Propensity-score-adjusted baseline characteristics of exposed and unexposed pregnant women by dose tertiles of the highest lithium prescription filled during the first trimester .....                                                                                  | 33 |
| Table S12. Unadjusted baseline characteristics of exposed and unexposed pregnant women by dose tertiles of the highest lamotrigine prescription filled during the first trimester .....                                                                                             | 36 |
| Table S13. Propensity-score-adjusted baseline characteristics of exposed and unexposed pregnant women by dose tertiles of the highest lamotrigine prescription filled during the first trimester .....                                                                              | 39 |
| Development of study cohort and sociodemographic characteristics across sequential restriction criteria.....                                                                                                                                                                        | 42 |
| Detailed outcome definition.....                                                                                                                                                                                                                                                    | 44 |
| Potential impact of missing terminations.....                                                                                                                                                                                                                                       | 45 |

**Figure S1. Absolute and relative risk of cardiac malformations among lithium-exposed and lamotrigine-exposed infants as compared with unexposed infants, stratified according to tertiles of the highest prescribed daily dose filled by the mother during the first trimester<sup>1</sup>**

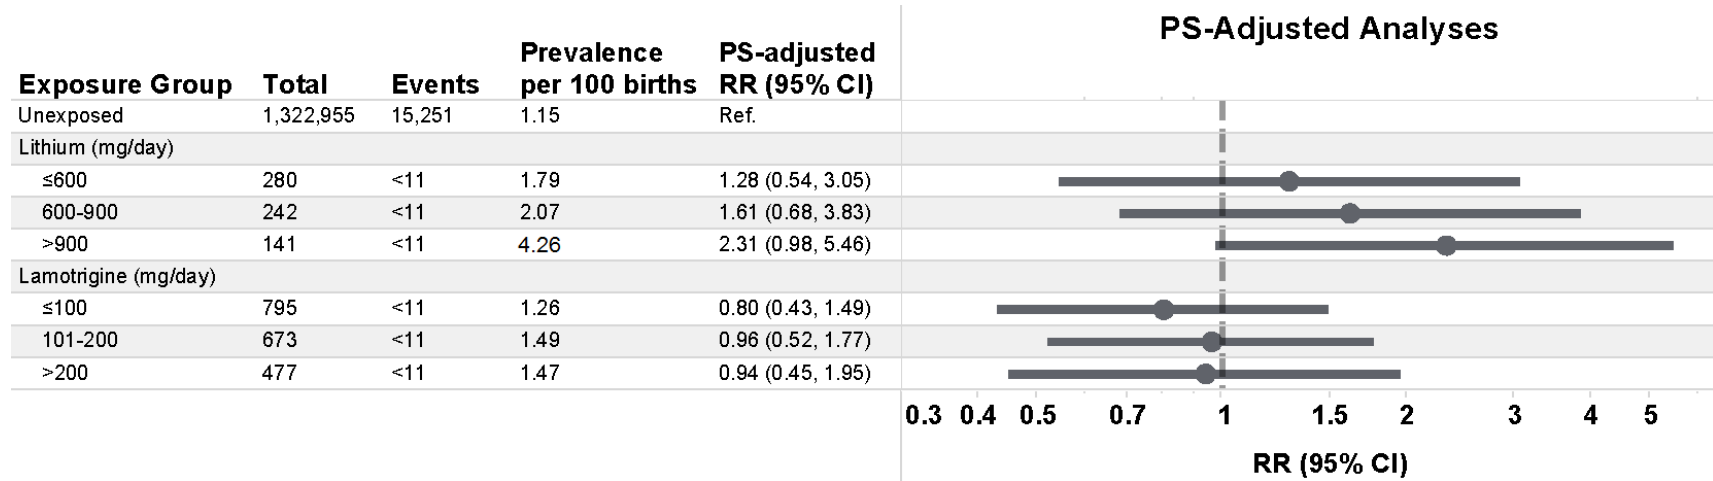

PS: propensity score; RR: risk ratios; CI: confidence intervals; Ref.: reference

<sup>1</sup>In accordance with the data use agreement, we do not report information for frequency cells with less than 11 cases. These are noted as <11

**Table S1. Studies evaluating the association between lithium exposure during pregnancy and the risk of cardiac malformations<sup>1</sup>**

| Study                         | Design                                   | Exposed | Reference                       | Number exposed       | Outcomes                    | Confounders adjusted      | Results                                                                                | Conclusion                                                                                                                                                             |
|-------------------------------|------------------------------------------|---------|---------------------------------|----------------------|-----------------------------|---------------------------|----------------------------------------------------------------------------------------|------------------------------------------------------------------------------------------------------------------------------------------------------------------------|
| Schou et al, 1973             | Retrospective uncontrolled cohort        | Lithium | None                            | 118                  | Any congenital malformation | none                      | 7.6% of exposed had a malformation, 6 cardiac, 2 Ebstein's anomaly                     | Inconclusive. Design overestimates risk                                                                                                                                |
| Nora, et al, 1974             | case report + re-interpretation Registry | Lithium | None                            | 2                    | Ebstein's anomaly           | none                      | 2 exposed cases described                                                              | <b>Five-fold increased risk of cardiac malformations and 400-fold increased risk of Ebstein's anomaly adding their 2 exposed cases to the report from the registry</b> |
| Weinstein and Goldfield, 1975 | Retrospective uncontrolled cohort        | Lithium | None                            | 143                  | Any congenital malformation | none                      | 10 (7%) of exposed had cardiac malformations. 4 had Ebstein's anomaly                  | Caution, consider reporting bias                                                                                                                                       |
| Weinstein and Goldfield, 1979 | Retrospective uncontrolled cohort        | Lithium | None                            | 212                  | Any congenital malformation | none                      | 10.4% of exposed had a malformation. Estimated Ebstein's anomaly as 162-fold increased | Caution                                                                                                                                                                |
| Kallen et al, 1983            | Prospective controlled cohort            | Lithium | mood disorders                  | 59                   | Cardiac malformations       | none                      | 4 cardiac defects (7%) compared with 2/228 unexposed                                   | Support elevated risk of cardiac defects                                                                                                                               |
| Sipek et al, 1989             | Case-control Study                       | Lithium | None                            | 0 out of 89          | Ebstein's anomaly           | none                      | no exposed cases                                                                       | Rise in recording of anomaly                                                                                                                                           |
| Kallen et al, 1988            | Case-control Study                       | Lithium | none                            | 0 out of 25          | Ebstein's anomaly           | none                      | No anomaly exposed                                                                     | Association with Ebstein's anomaly is weak                                                                                                                             |
| Czeizel et al, 1990           | Case-control Study                       | Lithium | None                            | 6 out of 10698 cases | Any congenital malformation | none                      | OR=1.3 (0.22-9.0)                                                                      | No association                                                                                                                                                         |
| Edmonds et al, 1990           | Case-control Study                       | Lithium | Non-exposed with mood disorders | 0 out of 34          | Ebstein's anomaly           | none                      | No exposed case                                                                        | Not a contributor to Ebstein's anomaly                                                                                                                                 |
| Zalzstein et al, 1990         | Case-control Study                       | Lithium | Non-exposed                     | 0 out of 50 cases    | Ebstein's anomaly           | none                      | No exposed case, one case in the control group                                         | Rule out a 28-fold increased risk                                                                                                                                      |
| Kallen et al, 1991            | Case-control Study                       | Lithium | none                            | 0 out of 13          | Cardiac malformations       | none                      | No anomaly exposed                                                                     | Rule out an 8-fold increased risk                                                                                                                                      |
| Jacobson et al, 1992          | Prospective controlled cohort            | Lithium | Non-exposed                     | 138                  | Any congenital malformation | Indication                | RR 1.5 (0.4-6.7)                                                                       | No association. 1 Ebstein's anomaly in exposed                                                                                                                         |
| Correa-Villasenor et al, 1994 | Case-control Study                       | Lithium | None                            | 0 out of 47 cases    | Ebstein's anomaly           | genetic and environmental | No exposed case                                                                        | More studies needed                                                                                                                                                    |
| Briggs, 2002                  | Prospective uncontrolled                 | Lithium | None                            | 62                   | Any congenital malformation | none                      | No cardiac malformation                                                                | No conclusion reported                                                                                                                                                 |

|                         |                                 |         |                        |     |                             |            |                                                                                                                                                   |                                          |
|-------------------------|---------------------------------|---------|------------------------|-----|-----------------------------|------------|---------------------------------------------------------------------------------------------------------------------------------------------------|------------------------------------------|
|                         | cohort                          |         |                        |     |                             |            |                                                                                                                                                   |                                          |
| Kramer et al, 2003      | Prospective uncontrolled cohort | Lithium | None                   | 20  | Any congenital malformation | none       | 0 cases                                                                                                                                           | Lithium relatively safe                  |
| Reis et al, 2008        | Prospective uncontrolled cohort | Lithium | None                   | 79  | Any congenital malformation | none       | 8 cases, 4 mild cardiac                                                                                                                           | Concern for decades revise               |
| Boden R et al, 2012     | Prospective controlled cohort   | Lithium | other mood stabilizers | 107 | Any congenital malformation | none       | 3 cases, 2 of them cardiac                                                                                                                        | No more cardiac defects than lamotrigine |
| Diav-Citrin et al, 2014 | Prospective controlled cohort   | Lithium | mood disorders         | 123 | Any congenital malformation | indication | 8 cases (6.5%) compared with 3.3% in nontreated women with bipolar disorder. 3 cardiacs (2.4%) compared with 0.3% in control. 1 Ebstein's anomaly | Association with cardiac anomalies       |

<sup>1</sup> The prevalence of Epstein's anomaly has been estimated to be in the order of 5 cases per 100,000 births<sup>13</sup>, whereas the prevalence of RVOTO defects has been estimated to be over 5 cases per 10,000 births, with up to 10% of the RVOTO defects being Epstein's anomalies.<sup>19</sup>

1. Schou M, Goldfield MD, Weinstein MR, Villeneuve A. Lithium and pregnancy. I. Report from the Register of Lithium Babies. *British medical journal* 1973;2:135-6.
2. Nora JJ, Nora AH, Toews WH. Letter: Lithium, Ebstein's anomaly, and other congenital heart defects. *Lancet* 1974;2:594-5.
3. Weinstein MR, Goldfield M. Cardiovascular malformations with lithium use during pregnancy. *The American journal of psychiatry* 1975;132:529-31.
4. Weinstein MR. Lithium treatment of women during pregnancy and in the post-delivery period: Lancaster England: MTP; 1980.
5. Kallen B, Tandberg A. Lithium and pregnancy. A cohort study on manic-depressive women. *Acta psychiatrica Scandinavica* 1983;68:134-9.
6. Sipek A. Lithium and Ebstein's anomaly. *Cor et vasa* 1989;31:149-56.
7. Kallen B. Comments on Teratogen Update: Lithium. *Teratology* 1988;38:598.
8. Czeizel A, Racz J. Evaluation of drug intake during pregnancy in the Hungarian Case-Control Surveillance of Congenital Anomalies. *Teratology* 1990;42:505-12.
9. Edmonds LD, Oakley GP. Ebstein's anomaly and maternal lithium exposure during pregnancy (abstract). *Teratology* 1990;41:551-2.
10. Zalstein E, Koren G, Einarson T, Freedom RM. A case-control study on the association between first trimester exposure to lithium and Ebstein's anomaly. *The American journal of cardiology* 1990;65:817-8.
11. Kallen B. Lithium therapy and congenital malformations. In: Schrauser G, Klippel K, eds. *Lithium in biology and medicine: New applications and developments*. Weinheim, Germany: VCH Verlagsgesellschaft; 1991:121-30.
12. Jacobson SJ, Jones K, Johnson K, et al. Prospective multicentre study of pregnancy outcome after lithium exposure during first trimester. *Lancet* 1992;339:530-3.
13. Correa-Villasenor A, Ferencz C, Neill CA, Wilson PD, Boughman JA. Ebstein's malformation of the tricuspid valve: genetic and environmental factors. The Baltimore-Washington Infant Study Group. *Teratology* 1994;50:137-47.
14. Briggs GG, Freeman RK, Yaffe SJ. *Drugs in pregnancy and lactation*. 7th ed. Philadelphia: Lippincott Williams & Wilkins; 2002.
15. Kramer, A., Knoppert-Van der Klein, EAM, Van Kampt, I. L., Walter, F. J., Van Vliet, I. M., and Zitman, F. G. Bipolar and pregnant? No problem! A clinical evaluation of lithium use during pregnancy. *European Neuropsychopharmacology* 2003;13:S246-S246.
16. Reis M, Kallen B. Maternal use of antipsychotics in early pregnancy and delivery outcome. *Journal of clinical psychopharmacology* 2008;28:279-88.
17. Boden R, Lundgren M, Brandt L, Reutfors J, Andersen M, Kieler H. Risks of adverse pregnancy and birth outcomes in women treated or not treated with mood stabilisers for bipolar disorder: population based cohort study. *BMJ* 2012;345:e7085.
18. Diav-Citrin O, Shechtman S, Tahover E, et al. Pregnancy outcome following in utero exposure to lithium: a prospective, comparative, observational study. *The American journal of psychiatry* 2014;171:785-94.

19. Ferencz CL, Correa-Villasenor A, Loffredo CA, Wilson PD, eds. Perspectives in pediatric cardiology: genetic and environmental risk factors of major cardiovascular malformations. Armonk, NY: Futura Publishing, 1997.

**Table S2. Unadjusted and propensity-score-adjusted baseline characteristics of lithium-exposed and unexposed pregnant women<sup>1</sup>**

|                                                       | Unadjusted                   |                    |              | Propensity-score adjusted      |                    |           |
|-------------------------------------------------------|------------------------------|--------------------|--------------|--------------------------------|--------------------|-----------|
| Baseline characteristics                              | Non-exposed<br>(N=1,322,955) | Lithium<br>(N=663) | St.<br>Diff. | Non-<br>exposed<br>(N=928,767) | Lithium<br>(N=663) | St. Diff. |
| Age, mean (SD)                                        | 24.0 (5.8)                   | 25.6 (6.1)         | 0.28         | 25.6 (6.2)                     | 25.6 (6.1)         | 0.01      |
| Race                                                  |                              |                    |              |                                |                    |           |
| White                                                 | 526,603 (39.8)               | 490 (73.9)         | 0.73         | 708,409 (76.3)                 | 490 (73.9)         | -0.05     |
| Black                                                 | 445,675 (33.7)               | 89 (13.4)          | -0.49        | 113,987 (12.3)                 | 89 (13.4)          | 0.03      |
| Hispanic                                              | 195,174 (14.8)               | 36 (5.4)           | -0.31        | 41,876 (4.5)                   | 36 (5.4)           | 0.04      |
| Other <sup>2</sup>                                    | 155,503 (11.8)               | 48 (7.2)           | -0.15        | 64,495 (6.9)                   | 48 (7.2)           | 0.01      |
| Year                                                  |                              |                    |              |                                |                    |           |
| 2000                                                  | 1,569 (0.1)                  | <11                | 0.01         | 2,145 (0.2)                    | <11                | -0.02     |
| 2001                                                  | 81,024 (6.1)                 | 34 (5.1)           | -0.04        | 50,686 (5.5)                   | 34 (5.1)           | -0.01     |
| 2002                                                  | 92,771 (7.0)                 | 41 (6.2)           | -0.03        | 50,817 (5.5)                   | 41 (6.2)           | 0.03      |
| 2003                                                  | 126,822 (9.6)                | 67 (10.1)          | 0.02         | 94,992 (10.2)                  | 67 (10.1)          | 0.00      |
| 2004                                                  | 153,523 (11.6)               | 83 (12.5)          | 0.03         | 111,961 (12.1)                 | 83 (12.5)          | 0.01      |
| 2005                                                  | 154,733 (11.7)               | 69 (10.4)          | -0.04        | 95,300 (10.3)                  | 69 (10.4)          | 0.00      |
| 2006                                                  | 154,415 (11.7)               | 72 (10.9)          | -0.03        | 99,994 (10.8)                  | 72 (10.9)          | 0.00      |
| 2007                                                  | 146,133 (11.0)               | 73 (11.0)          | 0.00         | 102,872 (11.1)                 | 73 (11.0)          | 0.00      |
| 2008                                                  | 143,246 (10.8)               | 77 (11.6)          | 0.02         | 106,821 (11.5)                 | 77 (11.6)          | 0.00      |
| 2009                                                  | 149,472 (11.3)               | 86 (13.0)          | 0.05         | 123,657 (13.3)                 | 86 (13.0)          | -0.01     |
| 2010                                                  | 119,247 (9.0)                | 60 (9.0)           | 0.00         | 89,520 (9.6)                   | 60 (9.1)           | -0.02     |
| Multiple gestation                                    | 44,792 (3.4)                 | 17 (2.6)           | -0.05        | 25,131 (2.7)                   | 17 (2.6)           | -0.01     |
| <b>Psychiatric and neurological conditions, N (%)</b> |                              |                    |              |                                |                    |           |
| Bipolar disorder                                      | 9,485 (0.7)                  | 436 (65.8)         | 1.91         | 608,904 (65.6)                 | 436 (65.8)         | 0.00      |
| Depression                                            | 63,110 (4.8)                 | 167 (25.2)         | 0.60         | 257,475 (27.7)                 | 167 (25.2)         | -0.06     |
| Anxiety                                               | 41,759 (3.2)                 | 117 (17.6)         | 0.49         | 179,054 (19.3)                 | 117 (17.6)         | -0.04     |
| Schizophrenia                                         | 1,639 (0.1)                  | 33 (5.0)           | 0.31         | 39,603 (4.3)                   | 33 (5.0)           | 0.03      |



|                                                  |                |            |      |                |            |       |
|--------------------------------------------------|----------------|------------|------|----------------|------------|-------|
| Other psychosis                                  | 2,138 (0.2)    | 25 (3.8)   | 0.26 | 31,600 (3.4)   | 25 (3.8)   | 0.02  |
| Personality disorder                             | 2,160 (0.2)    | 36 (5.4)   | 0.32 | 42,984 (4.6)   | 36 (5.4)   | 0.04  |
| Adjustment disorder                              | 13,135 (1.0)   | 21 (3.2)   | 0.15 | 34,273 (3.7)   | 21 (3.2)   | -0.03 |
| Attention deficit hyperactivity disorder         | 10,118 (0.8)   | 48 (7.2)   | 0.33 | 71,611 (7.7)   | 48 (7.2)   | -0.02 |
| Delirium                                         | 698 (0.1)      | <11        | 0.10 | 5,560 (0.6)    | <11        | 0.00  |
| Other psychiatric disorders                      | 15,150 (1.1)   | 51 (7.7)   | 0.32 | 70,327 (7.6)   | 51 (7.7)   | 0.00  |
| Alcohol abuse or dependence                      | 6,754 (0.5)    | 32 (4.8)   | 0.27 | 40,514 (4.4)   | 32 (4.8)   | 0.02  |
| Drug abuse or dependence                         | 16,378 (1.2)   | 76 (11.5)  | 0.43 | 98,862 (10.6)  | 76 (11.5)  | 0.03  |
| Chronic fatigue syndrome                         | 36,215 (2.7)   | 38 (5.7)   | 0.15 | 56,635 (6.1)   | 38 (5.7)   | -0.02 |
| Sleep disorder                                   | 7,945 (0.6)    | 25 (3.8)   | 0.22 | 36,765 (4.0)   | 25 (3.8)   | -0.01 |
| Epilepsy or convulsions                          | 3,894 (0.3)    | 13 (2.0)   | 0.16 | 16,304 (1.8)   | 13 (2.0)   | 0.02  |
| Pain conditions <sup>3</sup>                     | 183,219 (13.8) | 184 (27.8) | 0.35 | 272,867 (29.4) | 184 (27.8) | -0.04 |
| Migraine or headache                             | 88,074 (6.7)   | 99 (14.9)  | 0.27 | 144,121 (15.5) | 99 (14.9)  | -0.02 |
| <b>Chronic maternal illness, N (%)</b>           |                |            |      |                |            |       |
| Hypertension                                     | 24,529 (1.9)   | 22 (3.3)   | 0.09 | 30,197 (3.3)   | 22 (3.3)   | 0.00  |
| Diabetes                                         | 23,287 (1.8)   | 18 (2.7)   | 0.06 | 26,222 (2.8)   | 18 (2.7)   | -0.01 |
| Renal disease                                    | 3,795 (0.3)    | <11        | 0.06 | 6,526 (0.7)    | <11        | 0.01  |
| Obesity or overweight                            | 22,123 (1.7)   | 19 (2.9)   | 0.08 | 28,494 (3.1)   | 19 (2.9)   | -0.01 |
| Smoking                                          | 38,975 (2.9)   | 51 (7.7)   | 0.21 | 77,809 (8.4)   | 51 (7.7)   | -0.03 |
| <b>Psychotropic and other medications, N (%)</b> |                |            |      |                |            |       |
| Antidepressants                                  | 106,412 (8.0)  | 431 (65.0) | 1.47 | 641,793 (69.1) | 431 (65.0) | -0.09 |
| Antipsychotics                                   | 12,366 (0.9)   | 308 (46.5) | 1.27 | 394,767 (42.5) | 308 (46.5) | 0.08  |
| Benzodiazepines                                  | 34,932 (2.6)   | 207 (31.2) | 0.82 | 283,907 (30.6) | 207 (31.2) | 0.01  |
| Other anxiolytics                                | 4,288 (0.3)    | 31 (4.7)   | 0.28 | 41,285 (4.4)   | 31 (4.7)   | 0.01  |
| Other hypnotics                                  | 43,150 (3.3)   | 114 (17.2) | 0.47 | 154,213 (16.6) | 114 (17.2) | 0.02  |
| Barbiturates                                     | 12,269 (0.9)   | 22 (3.3)   | 0.17 | 29,564 (3.2)   | 22 (3.3)   | 0.01  |
| Stimulants                                       | 7,842 (0.6)    | 54 (8.1)   | 0.38 | 76,960 (8.3)   | 54 (8.1)   | -0.01 |
| Opioids                                          | 249,821 (18.9) | 253 (38.2) | 0.44 | 370,867 (39.9) | 253 (38.2) | -0.04 |
| Triptans                                         | 12,174 (0.9)   | 20 (3.0)   | 0.15 | 30,918 (3.3)   | 20 (3.0)   | -0.02 |
| Nonsteroidal anti-inflammatory drugs             | 211,001 (15.9) | 166 (25.0) | 0.23 | 243,096 (26.2) | 166 (25.0) | -0.03 |
| Antihypertensive medications                     | 27,316 (2.1)   | 48 (7.2)   | 0.25 | 64,838 (7.0)   | 48 (7.2)   | 0.01  |

|                                                      |              |           |      |                |           |       |
|------------------------------------------------------|--------------|-----------|------|----------------|-----------|-------|
| Non-insulin antidiabetic medications                 | 8,681 (0.7)  | <11       | 0.08 | 13,013 (1.4)   | <11       | 0.01  |
| Insulin                                              | 9,554 (0.7)  | <11       | 0.04 | 10,621 (1.1)   | <11       | -0.01 |
| Corticosteroids                                      | 75,693 (5.7) | 73 (11.0) | 0.19 | 104,859 (11.3) | 73 (11.0) | -0.01 |
| Fluconazole                                          | 22,091 (1.7) | 26 (3.9)  | 0.14 | 37,053 (4.0)   | 26 (3.9)  | 0.00  |
| Other teratogens <sup>4</sup>                        | 16,321 (1.2) | 11 (1.7)  | 0.04 | 16,018 (1.7)   | 11 (1.7)  | -0.01 |
| Methadone                                            | 595 (0.0)    | <11       | 0.06 | 2,704 (0.3)    | <11       | 0.00  |
| Buprenorphine                                        | 1,068 (0.1)  | <11       | 0.12 | 7,966 (0.9)    | <11       | 0.01  |
| Naltrexone                                           | 65 (0.0)     | <11       | 0.05 | 1,295 (0.1)    | <11       | 0.00  |
| Naloxone                                             | 1,215 (0.1)  | <11       | 0.14 | 10,569 (1.1)   | <11       | 0.01  |
| <b>Markers of burden of disease</b>                  |              |           |      |                |           |       |
| Obstetric Comorbidity Index <sup>5</sup> , mean (SD) | 0.9 (1.4)    | 1.6 (1.8) | 0.44 | 1.6 (1.8)      | 1.6 (1.8) | 0.02  |
| Number of distinct prescriptions, mean (SD)          | 1.6 (2.3)    | 4.5 (3.7) | 0.93 | 4.6 (3.7)      | 4.5 (3.7) | -0.04 |
| Number of diagnoses, mean (SD)                       | 2.5 (3.1)    | 5.3 (4.5) | 0.73 | 5.6 (4.5)      | 5.3 (4.5) | -0.06 |
| Number of outpatient physician visits, mean (SD)     | 2.8 (4.0)    | 8.5 (9.8) | 0.76 | 8.0 (8.5)      | 8.5 (9.8) | 0.05  |
| Patients hospitalized, N (%)                         | 48,294 (3.7) | 60 (9.0)  | 0.22 | 81,082 (8.7)   | 60 (9.0)  | 0.01  |
| Number of hospitalizations, mean (SD)                | 0.0 (0.2)    | 0.1 (0.5) | 0.21 | 0.1 (0.4)      | 0.1 (0.5) | 0.03  |
| Number of days hospitalized, mean (SD)               | 0.1 (0.9)    | 0.6 (3.1) | 0.22 | 0.5 (2.0)      | 0.6 (3.0) | 0.07  |
| Number of emergency room visits, mean (SD)           | 0.3 (0.8)    | 0.8 (2.9) | 0.23 | 0.7 (1.6)      | 0.8 (2.9) | 0.02  |

St. Diff.: Standardized differences, i.e., the difference in means or proportions divided by the pooled standard deviation [Austin PC. Balance diagnostics for comparing the distribution of baseline covariates between treatment groups in propensity-score matched samples. *Statistics in medicine* 2009;28:3083-107]

<sup>1</sup> In accordance with the data use agreement, we do not report information for frequency cells with less than 11 cases. These are noted as <11

<sup>2</sup> Other race includes Asian, Native American, Other, and Unknown

<sup>3</sup> Pain conditions include neuropathic and non-neuropathic conditions

<sup>4</sup> Other teratogens include methimazole, danazol, propylthiouracil, and progestins

<sup>5</sup> The obstetric comorbidity index predicts severe maternal morbidity. The range for the maternal comorbidity index is 0 to 45, with lower values associated with lower burden of maternal illness and higher values associated with higher burden of maternal illness [Bateman BT, Mhyre JM, Hernandez-Diaz S, Huybrechts KF, Fischer MA, Creanga AA, Callaghan WM, Gagne JJ. Development of a comorbidity index for use in obstetric patients. *Obstet Gynecol.* 2013;122:957-65]

**Table S3. Unadjusted and propensity-score-adjusted baseline characteristics of lamotrigine-exposed and unexposed pregnant women<sup>1</sup>**

| Baseline characteristics                              | Unadjusted                   |                         |                  | Propensity-score adjusted    |                         |                  |
|-------------------------------------------------------|------------------------------|-------------------------|------------------|------------------------------|-------------------------|------------------|
|                                                       | Non-exposed<br>(N=1,322,955) | Lamotrigine<br>(N=1945) | <i>St. Diff.</i> | Non-exposed<br>(N=1,233,824) | Lamotrigine<br>(N=1945) | <i>St. Diff.</i> |
| Age, mean (SD)                                        | 24.0 (5.8)                   | 25.2 (5.8)              | 0.20             | 25.1 (5.9)                   | 25.2 (5.8)              | 0.01             |
| Race                                                  |                              |                         |                  |                              |                         |                  |
| White                                                 | 526,603 (39.8)               | 1446 (74.3)             | 0.74             | 941,365 (76.3)               | 1446 (74.3)             | -0.05            |
| Black                                                 | 445,675 (33.7)               | 243 (12.5)              | -0.52            | 147,490 (12.0)               | 243 (12.5)              | 0.02             |
| Hispanic                                              | 195,174 (14.8)               | 107 (5.5)               | -0.31            | 56,774 (4.6)                 | 107 (5.5)               | 0.04             |
| Other <sup>2</sup>                                    | 155,503 (11.8)               | 149 (7.7)               | -0.14            | 88,195 (7.2)                 | 149 (7.7)               | 0.02             |
| Year                                                  |                              |                         |                  |                              |                         |                  |
| 2000                                                  | 1,569 (0.1)                  | <11                     | -0.05            | <11                          | <11                     | 0.00             |
| 2001                                                  | 81,024 (6.1)                 | 17 (0.9)                | -0.29            | 10,369 (0.8)                 | 17 (0.9)                | 0.00             |
| 2002                                                  | 92,771 (7.0)                 | 19 (1.0)                | -0.31            | 12,740 (1.0)                 | 19 (1.0)                | -0.01            |
| 2003                                                  | 126,822 (9.6)                | 26 (1.3)                | -0.37            | 18,123 (1.5)                 | 26 (1.3)                | -0.01            |
| 2004                                                  | 153,523 (11.6)               | 97 (5.0)                | -0.24            | 62,753 (5.1)                 | 97 (5.0)                | 0.00             |
| 2005                                                  | 154,733 (11.7)               | 154 (7.9)               | -0.13            | 95,867 (7.8)                 | 154 (7.9)               | 0.01             |
| 2006                                                  | 154,415 (11.7)               | 224 (11.5)              | 0.00             | 145,180 (11.8)               | 224 (11.5)              | -0.01            |
| 2007                                                  | 146,133 (11.0)               | 286 (14.7)              | 0.11             | 180,420 (14.6)               | 286 (14.7)              | 0.00             |
| 2008                                                  | 143,246 (10.8)               | 353 (18.1)              | 0.21             | 222,836 (18.1)               | 353 (18.2)              | 0.00             |
| 2009                                                  | 149,472 (11.3)               | 436 (22.4)              | 0.30             | 276,583 (22.4)               | 436 (22.4)              | 0.00             |
| 2010                                                  | 119,247 (9.0)                | 333 (17.1)              | 0.24             | 208,953 (16.9)               | 333 (17.1)              | 0.00             |
| Multiple gestation                                    | 44,792 (3.4)                 | 83 (4.3)                | 0.05             | 52,917 (4.3)                 | 83 (4.3)                | 0.00             |
| <b>Psychiatric and neurological conditions, N (%)</b> |                              |                         |                  |                              |                         |                  |
| Bipolar disorder                                      | 9,485 (0.7)                  | 798 (41.0)              | 1.14             | 505,264 (41.0)               | 798 (41.0)              | 0.00             |
| Depression                                            | 63,110 (4.8)                 | 402 (20.7)              | 0.49             | 284,035 (23.0)               | 402 (20.7)              | -0.06            |
| Anxiety                                               | 41,759 (3.2)                 | 343 (17.6)              | 0.49             | 233,688 (18.9)               | 343 (17.6)              | -0.03            |
| Schizophrenia                                         | 1,639 (0.1)                  | 29 (1.5)                | 0.15             | 19,142 (1.6)                 | 29 (1.5)                | 0.00             |

|                                                  |                |             |      |                |             |       |
|--------------------------------------------------|----------------|-------------|------|----------------|-------------|-------|
| Other psychosis                                  | 2,138 (0.2)    | 18 (0.9)    | 0.10 | 12,094 (1.0)   | 18 (0.9)    | -0.01 |
| Personality disorder                             | 2,160 (0.2)    | 67 (3.4)    | 0.25 | 37,026 (3.0)   | 67 (3.4)    | 0.03  |
| Adjustment disorder                              | 13,135 (1.0)   | 53 (2.7)    | 0.13 | 36,711 (3.0)   | 53 (2.7)    | -0.02 |
| Attention deficit hyperactivity disorder         | 10,118 (0.8)   | 133 (6.8)   | 0.32 | 88,720 (7.2)   | 133 (6.8)   | -0.01 |
| Delirium                                         | 698 (0.1)      | 11 (0.6)    | 0.09 | 7,203 (0.6)    | 11 (0.6)    | 0.00  |
| Other psychiatric disorders                      | 15,150 (1.1)   | 118 (6.1)   | 0.27 | 75,180 (6.1)   | 118 (6.1)   | 0.00  |
| Alcohol abuse or dependence                      | 6,754 (0.5)    | 35 (1.8)    | 0.12 | 21,811 (1.8)   | 35 (1.8)    | 0.00  |
| Drug abuse or dependence                         | 16,378 (1.2)   | 101 (5.2)   | 0.23 | 64,517 (5.2)   | 101 (5.2)   | 0.00  |
| Chronic fatigue syndrome                         | 36,215 (2.7)   | 124 (6.4)   | 0.18 | 84,343 (6.8)   | 124 (6.4)   | -0.02 |
| Sleep disorder                                   | 7,945 (0.6)    | 79 (4.1)    | 0.23 | 52,227 (4.2)   | 79 (4.1)    | -0.01 |
| Epilepsy or convulsions                          | 3,894 (0.3)    | 384 (19.7)  | 0.68 | 228,421 (18.5) | 384 (19.7)  | 0.03  |
| Pain conditions <sup>3</sup>                     | 183,219 (13.8) | 646 (33.2)  | 0.47 | 412,470 (33.4) | 646 (33.2)  | 0.00  |
| Migraine or headache                             | 88,074 (6.7)   | 308 (15.8)  | 0.29 | 192,645 (15.6) | 308 (15.8)  | 0.01  |
| <b>Chronic maternal illness, N (%)</b>           |                |             |      |                |             |       |
| Hypertension                                     | 24,529 (1.9)   | 79 (4.1)    | 0.13 | 52,295 (4.2)   | 79 (4.1)    | -0.01 |
| Diabetes                                         | 23,287 (1.8)   | 45 (2.3)    | 0.04 | 31,288 (2.5)   | 45 (2.3)    | -0.01 |
| Renal disease                                    | 3,795 (0.3)    | 16 (0.8)    | 0.07 | 9,612 (0.8)    | 16 (0.8)    | 0.00  |
| Obesity or overweight                            | 22,123 (1.7)   | 63 (3.2)    | 0.10 | 39,654 (3.2)   | 63 (3.2)    | 0.00  |
| Smoking                                          | 38,975 (2.9)   | 181 (9.3)   | 0.27 | 118,318 (9.6)  | 181 (9.3)   | -0.01 |
| <b>Psychotropic and other medications, N (%)</b> |                |             |      |                |             |       |
| Antidepressants                                  | 106,412 (8.0)  | 1039 (53.4) | 1.13 | 711,079 (57.6) | 1039 (53.4) | -0.08 |
| Antipsychotics                                   | 12,366 (0.9)   | 571 (29.4)  | 0.86 | 345,611 (28.0) | 571 (29.4)  | 0.03  |
| Benzodiazepines                                  | 34,932 (2.6)   | 516 (26.5)  | 0.72 | 322,332 (26.1) | 516 (26.5)  | 0.01  |
| Other anxiolytics                                | 4,288 (0.3)    | 82 (4.2)    | 0.26 | 49,140 (4.0)   | 82 (4.2)    | 0.01  |
| Other hypnotics                                  | 43,150 (3.3)   | 343 (17.6)  | 0.48 | 212,876 (17.3) | 343 (17.6)  | 0.01  |
| Barbiturates                                     | 12,269 (0.9)   | 47 (2.4)    | 0.12 | 29,128 (2.4)   | 47 (2.4)    | 0.00  |
| Stimulants                                       | 7,842 (0.6)    | 209 (10.7)  | 0.45 | 125,946 (10.2) | 209 (10.8)  | 0.02  |
| Opioids                                          | 249,821 (18.9) | 752 (38.7)  | 0.45 | 487,158 (39.5) | 752 (38.7)  | -0.02 |
| Triptans                                         | 12,174 (0.9)   | 73 (3.8)    | 0.19 | 48,655 (3.9)   | 73 (3.8)    | -0.01 |
| Nonsteroidal anti-inflammatory drugs             | 211,001 (15.9) | 510 (26.2)  | 0.25 | 337,363 (27.3) | 510 (26.2)  | -0.03 |
| Antihypertensive medications                     | 27,316 (2.1)   | 141 (7.3)   | 0.25 | 88,175 (7.2)   | 141 (7.3)   | 0.00  |

|                                                      |              |            |      |                |            |       |
|------------------------------------------------------|--------------|------------|------|----------------|------------|-------|
| Non-insulin antidiabetic medications                 | 8,681 (0.7)  | 42 (2.2)   | 0.13 | 28,551 (2.3)   | 42 (2.2)   | -0.01 |
| Insulin                                              | 9,554 (0.7)  | 19 (1.0)   | 0.03 | 13,178 (1.1)   | 19 (1.0)   | -0.01 |
| Corticosteroids                                      | 75,693 (5.7) | 226 (11.6) | 0.21 | 146,487 (11.9) | 226 (11.6) | -0.01 |
| Fluconazole                                          | 22,091 (1.7) | 81 (4.2)   | 0.15 | 52,578 (4.3)   | 81 (4.2)   | 0.00  |
| Other teratogens <sup>4</sup>                        | 16,321 (1.2) | 56 (2.9)   | 0.12 | 37,864 (3.1)   | 56 (2.9)   | -0.01 |
| Methadone                                            | 595 (0.0)    | <11        | 0.07 | 4,336 (0.4)    | <11        | 0.00  |
| Buprenorphine                                        | 1,068 (0.1)  | 15 (0.8)   | 0.11 | 10,222 (0.8)   | 15 (0.8)   | -0.01 |
| Naltrexone                                           | 65 (0.0)     | <11        | 0.07 | 2,212 (0.2)    | <11        | 0.02  |
| Naloxone                                             | 1,215 (0.1)  | 16 (0.8)   | 0.11 | 10,599 (0.9)   | 16 (0.8)   | 0.00  |
| <b>Markers of burden of disease</b>                  |              |            |      |                |            |       |
| Obstetric Comorbidity Index <sup>5</sup> , mean (SD) | 0.9 (1.4)    | 1.4 (1.8)  | 0.31 | 1.4 (1.8)      | 1.4 (1.8)  | -0.01 |
| Number of distinct prescriptions, mean (SD)          | 1.6 (2.3)    | 4.3 (3.7)  | 0.86 | 4.4 (3.6)      | 4.3 (3.7)  | -0.02 |
| Number of diagnoses, mean (SD)                       | 2.5 (3.1)    | 5.4 (4.5)  | 0.75 | 5.7 (4.5)      | 5.4 (4.5)  | -0.05 |
| Number of outpatient physician visits, mean (SD)     | 2.8 (4.0)    | 7.4 (8.8)  | 0.68 | 7.1 (7.5)      | 7.4 (8.8)  | 0.04  |
| Patients hospitalized, N (%)                         | 48,294 (3.7) | 115 (5.9)  | 0.11 | 74,398 (6.0)   | 115 (5.9)  | 0.00  |
| Number of hospitalizations, mean (SD)                | 0.0 (0.2)    | 0.1 (0.3)  | 0.10 | 0.1 (0.3)      | 0.1 (0.3)  | -0.01 |
| Number of days hospitalized, mean (SD)               | 0.1 (0.9)    | 0.3 (1.4)  | 0.11 | 0.3 (1.7)      | 0.3 (1.4)  | -0.01 |
| Number of emergency room visits, mean (SD)           | 0.3 (0.8)    | 0.7 (2.0)  | 0.28 | 0.7 (1.4)      | 0.7 (2.0)  | 0.01  |

St. Diff.: Standardized differences, i.e., the difference in means or proportions divided by the pooled standard deviation [Austin PC. Balance diagnostics for comparing the distribution of baseline covariates between treatment groups in propensity-score matched samples. *Statistics in medicine* 2009;28:3083-107]

<sup>1</sup> In accordance with the data use agreement, we do not report information for frequency cells with less than 11 cases. These are noted as <11

<sup>2</sup> Other race includes Asian, Native American, Other, and Unknown

<sup>3</sup> Pain conditions include neuropathic and non-neuropathic conditions

<sup>4</sup> Other teratogens include methimazole, danazol, propylthiouracil, and progestins

<sup>5</sup> The obstetric comorbidity index predicts severe maternal morbidity. The range for the maternal comorbidity index is 0 to 45, with lower values associated with lower burden of maternal illness and higher values associated with higher burden of maternal illness [Bateman BT, Mhyre JM, Hernandez-Diaz S, Huybrechts KF, Fischer MA, Creanga AA, Callaghan WM, Gagne JJ. Development of a comorbidity index for use in obstetric patients. *Obstet Gynecol.* 2013;122:957-65]

**Table S4. Unadjusted and propensity-score-adjusted baseline characteristics of lithium- and lamotrigine-exposed pregnant women, with lamotrigine serving as the active reference group<sup>1</sup>**

| Baseline characteristics                              | Unadjusted              |                    |                  | Propensity-score adjusted |                    |                  |
|-------------------------------------------------------|-------------------------|--------------------|------------------|---------------------------|--------------------|------------------|
|                                                       | Lamotrigine<br>(N=1945) | Lithium<br>(N=663) | <i>St. Diff.</i> | Lamotrigine<br>(N=1689)   | Lithium<br>(N=622) | <i>St. Diff.</i> |
| Age, mean (SD)                                        | 25.2 (5.8)              | 25.6 (6.1)         | 0.08             | 25.9 (6.1)                | 25.6 (6.1)         | -0.04            |
| Race                                                  |                         |                    |                  |                           |                    |                  |
| White                                                 | 1,446 (74.3)            | 490 (73.9)         | -0.01            | 1,301 (77.1)              | 461 (74.1)         | -0.07            |
| Black                                                 | 243 (12.5)              | 89 (13.4)          | 0.03             | 205 (12.2)                | 85 (13.7)          | 0.04             |
| Hispanic                                              | 107 (5.5)               | 36 (5.4)           | 0.00             | 71 (4.2)                  | 32 (5.1)           | 0.05             |
| Other <sup>2</sup>                                    | 149 (7.7)               | 48 (7.2)           | -0.02            | 112 (6.6)                 | 44 (7.1)           | 0.02             |
| Year                                                  |                         |                    |                  |                           |                    |                  |
| 2000                                                  | <11                     | <11                | 0.05             | <11                       | <11                | 0.00             |
| 2001                                                  | 17 (0.9)                | 34 (5.1)           | 0.25             | 77 (4.6)                  | 27 (4.3)           | -0.01            |
| 2002                                                  | 19 (1.0)                | 41 (6.2)           | 0.28             | 58 (3.5)                  | 30 (4.8)           | 0.07             |
| 2003                                                  | 26 (1.3)                | 67 (10.1)          | 0.38             | 142 (8.4)                 | 50 (8.0)           | -0.01            |
| 2004                                                  | 97 (5.0)                | 83 (12.5)          | 0.27             | 244 (14.4)                | 80 (12.9)          | -0.05            |
| 2005                                                  | 154 (7.9)               | 69 (10.4)          | 0.09             | 195 (11.6)                | 68 (10.9)          | -0.02            |
| 2006                                                  | 224 (11.5)              | 72 (10.9)          | -0.02            | 191 (11.3)                | 71 (11.4)          | 0.00             |
| 2007                                                  | 286 (14.7)              | 73 (11.0)          | -0.11            | 198 (11.7)                | 73 (11.7)          | 0.00             |
| 2008                                                  | 353 (18.2)              | 77 (11.6)          | -0.18            | 207 (12.3)                | 77 (12.4)          | 0.00             |
| 2009                                                  | 436 (22.4)              | 86 (13.0)          | -0.25            | 226 (13.4)                | 86 (13.8)          | 0.01             |
| 2010                                                  | 333 (17.1)              | 60 (9.1)           | -0.24            | 151 (8.9)                 | 60 (9.6)           | 0.02             |
| Multiple gestation                                    | 83 (4.3)                | 17 (2.6)           | -0.09            | 40 (2.4)                  | 17 (2.7)           | 0.02             |
| <b>Psychiatric and neurological conditions, N (%)</b> |                         |                    |                  |                           |                    |                  |
| Bipolar disorder                                      | 798 (41.0)              | 436 (65.8)         | 0.51             | 1,110 (65.7)              | 405 (65.1)         | -0.01            |
| Depression                                            | 402 (20.7)              | 167 (25.2)         | 0.11             | 389 (23.0)                | 158 (25.4)         | 0.05             |
| Anxiety                                               | 343 (17.6)              | 117 (17.6)         | 0.00             | 301 (17.8)                | 108 (17.4)         | -0.01            |
| Schizophrenia                                         | 29 (1.5)                | 33 (5.0)           | 0.20             | 80 (4.7)                  | 27 (4.3)           | -0.02            |

|                                                  |              |            |       |              |            |       |
|--------------------------------------------------|--------------|------------|-------|--------------|------------|-------|
| Other psychosis                                  | 18 (0.9)     | 25 (3.8)   | 0.19  | 41 (2.4)     | 20 (3.2)   | 0.05  |
| Personality disorder                             | 67 (3.4)     | 36 (5.4)   | 0.10  | 97 (5.8)     | 33 (5.3)   | -0.02 |
| Adjustment disorder                              | 53 (2.7)     | 21 (3.2)   | 0.03  | 52 (3.1)     | 17 (2.7)   | -0.02 |
| Attention deficit hyperactivity disorder         | 133 (6.8)    | 48 (7.2)   | 0.02  | 108 (6.4)    | 45 (7.2)   | 0.03  |
| Delirium                                         | 11 (0.6)     | <11        | 0.00  | <11          | <11        | 0.01  |
| Other psychiatric disorders                      | 118 (6.1)    | 51 (7.7)   | 0.06  | 95 (5.6)     | 46 (7.4)   | 0.07  |
| Alcohol abuse or dependence                      | 35 (1.8)     | 32 (4.8)   | 0.17  | 57 (3.4)     | 28 (4.5)   | 0.06  |
| Drug abuse or dependence                         | 101 (5.2)    | 76 (11.5)  | 0.23  | 171 (10.1)   | 68 (10.9)  | 0.03  |
| Chronic fatigue syndrome                         | 124 (6.4)    | 38 (5.7)   | -0.03 | 105 (6.2)    | 38 (6.1)   | -0.01 |
| Sleep disorder                                   | 79 (4.1)     | 25 (3.8)   | -0.01 | 75 (4.4)     | 25 (4.0)   | -0.02 |
| Epilepsy or convulsions                          | 384 (19.7)   | 13 (2.0)   | -0.60 | 37 (2.2)     | 13 (2.1)   | -0.01 |
| Pain conditions <sup>3</sup>                     | 646 (33.2)   | 184 (27.8) | -0.12 | 531 (31.4)   | 172 (27.7) | -0.08 |
| Migraine or headache                             | 308 (15.8)   | 99 (14.9)  | -0.03 | 291 (17.2)   | 93 (15.0)  | -0.06 |
| <b>Chronic maternal illness, N (%)</b>           |              |            |       |              |            |       |
| Hypertension                                     | 79 (4.1)     | 22 (3.3)   | -0.04 | 45 (2.7)     | 21 (3.4)   | 0.04  |
| Diabetes                                         | 45 (2.3)     | 18 (2.7)   | 0.03  | 50 (3.0)     | 17 (2.7)   | -0.01 |
| Renal disease                                    | 16 (0.8)     | <11        | -0.01 | 18 (1.1)     | <11        | -0.03 |
| Obesity or overweight                            | 63 (3.2)     | 19 (2.9)   | -0.02 | 41 (2.4)     | 18 (2.9)   | 0.03  |
| Smoking                                          | 181 (9.3)    | 51 (7.7)   | -0.06 | 164 (9.7)    | 50 (8.0)   | -0.06 |
| <b>Psychotropic and other medications, N (%)</b> |              |            |       |              |            |       |
| Antidepressants                                  | 1,039 (53.4) | 431 (65.0) | 0.24  | 1,041 (61.6) | 402 (64.6) | 0.06  |
| Antipsychotics                                   | 571 (29.4)   | 308 (46.5) | 0.36  | 834 (49.4)   | 284 (45.7) | -0.07 |
| Benzodiazepines                                  | 516 (26.5)   | 207 (31.2) | 0.10  | 552 (32.7)   | 192 (30.9) | -0.04 |
| Other anxiolytics                                | 82 (4.2)     | 31 (4.7)   | 0.02  | 71 (4.2)     | 29 (4.7)   | 0.02  |
| Other hypnotics                                  | 343 (17.6)   | 114 (17.2) | -0.01 | 235 (13.9)   | 106 (17.0) | 0.09  |
| Barbiturates                                     | 47 (2.4)     | 22 (3.3)   | 0.05  | 73 (4.3)     | 19 (3.1)   | -0.07 |
| Stimulants                                       | 209 (10.8)   | 54 (8.1)   | -0.09 | 152 (9.0)    | 52 (8.4)   | -0.02 |
| Opioids                                          | 752 (38.7)   | 253 (38.2) | -0.01 | 665 (39.3)   | 233 (37.5) | -0.04 |
| Triptans                                         | 73 (3.8)     | 20 (3.0)   | -0.04 | 28 (1.7)     | 19 (3.1)   | 0.09  |
| Nonsteroidal anti-inflammatory drugs             | 510 (26.2)   | 166 (25.0) | -0.03 | 401 (23.7)   | 155 (24.9) | 0.03  |
| Antihypertensive medications                     | 141 (7.3)    | 48 (7.2)   | 0.00  | 128 (7.6)    | 42 (6.8)   | -0.03 |

|                                                      |            |           |       |             |           |                    |
|------------------------------------------------------|------------|-----------|-------|-------------|-----------|--------------------|
| Non-insulin antidiabetic medications                 | 42 (2.2)   | <11       | -0.05 | 31 (1.8)    | <11       | -0.02              |
| Insulin                                              | 19 (1.0)   | <11       | 0.01  | 26 (1.6)    | <11       | -0.04              |
| Corticosteroids                                      | 226 (11.6) | 73 (11.0) | -0.02 | 204 (12.1)  | 67 (10.8) | -0.04              |
| Fluconazole                                          | 81 (4.2)   | 26 (3.9)  | -0.01 | 67 (4.0)    | 24 (3.9)  | -0.01              |
| Other teratogens <sup>4</sup>                        | 56 (2.9)   | 11 (1.7)  | -0.08 | 24 (1.4)    | 11 (1.8)  | 0.03               |
| Methadone                                            | <11        | <11       | -0.01 | <11         | <11       | 0.00               |
| Buprenorphine                                        | 15 (0.8)   | <11       | 0.01  | 14 (0.9)    | <11       | 0.01               |
| Naltrexone                                           | <11        | <11       | -0.02 | <11         | <11       | 0.02               |
| Naloxone                                             | 16 (0.8)   | <11       | 0.04  | 15 (0.9)    | <11       | 0.02               |
| <b>Markers of burden of disease</b>                  |            |           |       |             |           |                    |
| Obstetric Comorbidity Index <sup>5</sup> , mean (SD) | 1.4 (1.8)  | 1.6 (1.8) | 0.11  | 1.5 (1.7)   | 1.6 (1.8) | 0.06               |
| Number of distinct prescriptions, mean (SD)          | 4.3 (3.7)  | 4.5 (3.7) | 0.05  | 4.7 (4.1)   | 4.4 (3.7) | -0.07              |
| Number of diagnoses, mean (SD)                       | 5.4 (4.5)  | 5.3 (4.5) | -0.02 | 5.6 (4.8)   | 5.3 (4.5) | -0.05              |
| Number of outpatient physician visits, mean (SD)     | 7.4 (8.8)  | 8.5 (9.8) | 0.11  | 10.0 (13.6) | 8.3 (9.6) | -0.14 <sup>6</sup> |
| Patients hospitalized, N (%)                         | 115 (5.9)  | 60 (9.1)  | 0.12  | 140 (8.3)   | 56 (9.0)  | 0.03               |
| Number of hospitalizations, mean (SD)                | 0.1 (0.3)  | 0.1 (0.5) | 0.14  | 0.1 (0.4)   | 0.1 (0.5) | 0.03               |
| Number of days hospitalized, mean (SD)               | 0.3 (1.4)  | 0.6 (3.1) | 0.15  | 0.4 (1.7)   | 0.6 (3.0) | 0.08               |
| Number of emergency room visits, mean (SD)           | 0.7 (2.0)  | 0.8 (2.9) | 0.03  | 0.9 (3.2)   | 0.8 (3.0) | -0.03              |

St. Diff.: Standardized differences, i.e., the difference in means or proportions divided by the pooled standard deviation [Austin PC. Balance diagnostics for comparing the distribution of baseline covariates between treatment groups in propensity-score matched samples. *Statistics in medicine* 2009;28:3083-107]

<sup>1</sup> In accordance with the data use agreement, we do not report information for frequency cells with less than 11 cases. These are noted as <11

<sup>2</sup> Other race includes Asian, Native American, Other, and Unknown

<sup>3</sup> Pain conditions include neuropathic and non-neuropathic conditions

<sup>4</sup> Other teratogens include methimazole, danazol, propylthiouracil, and progestins

<sup>5</sup> The obstetric comorbidity index predicts severe maternal morbidity. The range for the maternal comorbidity index is 0 to 45, with lower values associated with lower burden of maternal illness and higher values associated with higher burden of maternal illness [Bateman BT, Mhyre JM, Hernandez-Diaz S, Huybrechts KF, Fischer MA, Creanga AA, Callaghan WM, Gagne JJ. Development of a comorbidity index for use in obstetric patients. *Obstet Gynecol.* 2013;122:957-65]

<sup>6</sup> The covariate “number of outpatient physician visits” was included in the propensity score model as a categorical covariate (quartiles). Quartiles of number of physician visits were balanced with standardized differences <0.1



**Table S5. Absolute and risk difference of cardiac, non-cardiac, and overall malformations among infants exposed to lithium during the first trimester as compared with lamotrigine-exposed or unexposed infants**

| <b>Exposure Group:</b>           | <b>Unexposed</b> | <b>Lamotrigine</b> | <b>Lithium</b>    |
|----------------------------------|------------------|--------------------|-------------------|
| <b>Total</b>                     | 1,322,955        | 1,945              | 663               |
| <b>Cardiac malformations</b>     |                  |                    |                   |
| <b>Events</b>                    | 15,251           | 27                 | 16                |
| <b>Prevalence per 100 births</b> | 1.15             | 1.39               | 2.41              |
| <b>Unadjusted RD (95% CI)</b>    | Ref.             | 0.24 (-0.28,0.76)  | 1.26 (0.09,2.43)  |
| <b>PS-adjusted RD (95% CI)</b>   | Ref.             | -0.16 (-0.68,0.36) | 0.95 (-0.22,2.12) |
| <b>Unadjusted RD (95% CI)</b>    | .                | Ref.               | 1.03 (-0.25,2.30) |
| <b>PS-adjusted RD (95% CI)</b>   | .                | Ref.               | 1.43 (0.09,2.77)  |
| <b>Non-cardiac malformations</b> |                  |                    |                   |
| <b>Events</b>                    | 27,816           | 49                 | 22                |
| <b>Prevalence per 100 births</b> | 2.10             | 2.52               | 3.32              |
| <b>Unadjusted RD (95% CI)</b>    | Ref.             | 0.42 (-0.28,1.11)  | 1.22 (-0.15,2.58) |
| <b>PS-adjusted RD (95% CI)</b>   | Ref.             | -0.29 (-0.99,0.41) | 0.60 (-0.76,1.97) |
| <b>Unadjusted RD (95% CI)</b>    | .                | Ref.               | 0.80 (-0.73,2.33) |
| <b>PS-adjusted RD (95% CI)</b>   | .                | Ref.               | 1.30 (-0.27,2.88) |
| <b>Overall malformations</b>     |                  |                    |                   |
| <b>Events</b>                    | 43,067           | 76                 | 38                |
| <b>Prevalence per 100 births</b> | 3.26             | 3.91               | 5.73              |
| <b>Unadjusted RD (95% CI)</b>    | Ref.             | 0.65 (-0.21,1.51)  | 2.48 (0.71,4.25)  |
| <b>PS-adjusted RD (95% CI)</b>   | Ref.             | -0.46 (-1.32,0.41) | 1.55 (-0.22,3.32) |
| <b>Unadjusted RD (95% CI)</b>    | .                | Ref.               | 1.82 (-0.14,3.79) |
| <b>PS-adjusted RD (95% CI)</b>   | .                | Ref.               | 2.73 (0.69,4.77)  |

PS: propensity score; RR: risk ratios; CI: confidence intervals; Ref.: reference

**Table S6. Unadjusted baseline characteristics of exposed and unexposed pregnant women by dose tertiles of the first lithium prescription filled during the first trimester<sup>1</sup>**

| Baseline characteristics                              | Non-exposed<br>(N=1,322,955) | Lithium<br>≤600<br>mg/day<br>(N=305) | St.<br>Diff. | Non-exposed<br>(N=1,322,955) | Lithium<br>601-900<br>mg/day<br>(N=235) | St.<br>Diff. | Non-exposed<br>(N=1,322,955) | Lithium<br>>900<br>mg/day<br>(N=123) | St.<br>Diff. |
|-------------------------------------------------------|------------------------------|--------------------------------------|--------------|------------------------------|-----------------------------------------|--------------|------------------------------|--------------------------------------|--------------|
| Age, mean (SD)                                        | 24.0 (5.8)                   | 25.3 (6.0)                           | 0.22         | 24.0 (5.8)                   | 25.8 (6.2)                              | 0.30         | 24.0 (5.8)                   | 26.3 (6.5)                           | 0.38         |
| Race                                                  |                              |                                      |              |                              |                                         |              |                              |                                      |              |
| White                                                 | 526,603 (39.8)               | 237 (77.7)                           | 0.83         | 526,603 (39.8)               | 169 (71.9)                              | 0.68         | 526,603 (39.8)               | 84 (68.3)                            | 0.60         |
| Black                                                 | 445,675 (33.7)               | 35 (11.5)                            | -0.55        | 445,675 (33.7)               | 37 (15.7)                               | -0.42        | 445,675 (33.7)               | 17 (13.8)                            | -0.48        |
| Hispanic                                              | 195,174 (14.8)               | 13 (4.3)                             | -0.36        | 195,174 (14.8)               | 13 (5.5)                                | -0.31        | 195,174 (14.8)               | <11                                  | -0.21        |
| Other <sup>2</sup>                                    | 155,503 (11.8)               | 20 (6.6)                             | -0.18        | 155,503 (11.8)               | 16 (6.8)                                | -0.17        | 155,503 (11.8)               | 12 (9.8)                             | -0.06        |
| Year                                                  |                              |                                      |              |                              |                                         |              |                              |                                      |              |
| 2000                                                  | 1,569 (0.1)                  | <11                                  | -0.05        | 1,569 (0.1)                  | <11                                     | 0.06         | 1,569 (0.1)                  | <11                                  | -0.05        |
| 2001                                                  | 81,024 (6.1)                 | 14 (4.6)                             | -0.07        | 81,024 (6.1)                 | 13 (5.5)                                | -0.03        | 81,024 (6.1)                 | <11                                  | -0.02        |
| 2002                                                  | 92,771 (7.0)                 | 22 (7.2)                             | 0.01         | 92,771 (7.0)                 | 11 (4.7)                                | -0.10        | 92,771 (7.0)                 | <11                                  | -0.02        |
| 2003                                                  | 126,822 (9.6)                | 30 (9.8)                             | 0.01         | 126,822 (9.6)                | 21 (8.9)                                | -0.02        | 126,822 (9.6)                | 16 (13.0)                            | 0.11         |
| 2004                                                  | 153,523 (11.6)               | 38 (12.5)                            | 0.03         | 153,523 (11.6)               | 28 (11.9)                               | 0.01         | 153,523 (11.6)               | 17 (13.8)                            | 0.07         |
| 2005                                                  | 154,733 (11.7)               | 34 (11.2)                            | -0.02        | 154,733 (11.7)               | 29 (12.3)                               | 0.02         | 154,733 (11.7)               | <11                                  | -0.25        |
| 2006                                                  | 154,415 (11.7)               | 32 (10.5)                            | -0.04        | 154,415 (11.7)               | 24 (10.2)                               | -0.05        | 154,415 (11.7)               | 16 (13.0)                            | 0.04         |
| 2007                                                  | 146,133 (11.1)               | 34 (11.1)                            | 0.00         | 146,133 (11.1)               | 24 (10.2)                               | -0.03        | 146,133 (11.1)               | 15 (12.2)                            | 0.04         |
| 2008                                                  | 143,246 (10.8)               | 31 (10.2)                            | -0.02        | 143,246 (10.8)               | 33 (14.0)                               | 0.10         | 143,246 (10.8)               | 13 (10.6)                            | -0.01        |
| 2009                                                  | 149,472 (11.3)               | 41 (13.4)                            | 0.07         | 149,472 (11.3)               | 31 (13.2)                               | 0.06         | 149,472 (11.3)               | 14 (11.4)                            | 0.00         |
| 2010                                                  | 119,247 (9.0)                | 29 (9.5)                             | 0.02         | 119,247 (9.0)                | 20 (8.5)                                | -0.02        | 119,247 (9.0)                | 11 (8.9)                             | 0.00         |
| Multiple gestation                                    | 44,792 (3.4)                 | <11                                  | -0.09        | 44,792 (3.4)                 | <11                                     | -0.08        | 44,792 (3.4)                 | <11                                  | 0.07         |
| <b>Psychiatric and neurological conditions, N (%)</b> |                              |                                      |              |                              |                                         |              |                              |                                      |              |
| Bipolar disorder                                      | 9,485 (0.7)                  | 188 (61.6)                           | 1.74         | 9,485 (0.7)                  | 157 (66.8)                              | 1.95         | 9,485 (0.7)                  | 91 (74.0)                            | 2.31         |
| Depression                                            | 63,110 (4.8)                 | 82 (26.9)                            | 0.63         | 63,110 (4.8)                 | 59 (25.1)                               | 0.59         | 63,110 (4.8)                 | 26 (21.1)                            | 0.50         |
| Anxiety                                               | 41,759 (3.2)                 | 59 (19.3)                            | 0.53         | 41,759 (3.2)                 | 42 (17.9)                               | 0.49         | 41,759 (3.2)                 | 16 (13.0)                            | 0.37         |
| Schizophrenia                                         | 1,639 (0.1)                  | 12 (3.9)                             | 0.27         | 1,639 (0.1)                  | 15 (6.4)                                | 0.36         | 1,639 (0.1)                  | <11                                  | 0.31         |
| Other psychosis                                       | 2,138 (0.2)                  | <11                                  | 0.21         | 2,138 (0.2)                  | <11                                     | 0.28         | 2,138 (0.2)                  | <11                                  | 0.33         |

|                                                  |                |            |       |                |            |       |                |           |       |
|--------------------------------------------------|----------------|------------|-------|----------------|------------|-------|----------------|-----------|-------|
| Personality disorder                             | 2,160 (0.2)    | 17 (5.6)   | 0.33  | 2,160 (0.2)    | 13 (5.5)   | 0.33  | 2,160 (0.2)    | <11       | 0.30  |
| Adjustment disorder                              | 13,135 (1.0)   | 12 (3.9)   | 0.19  | 13,135 (1.0)   | <11        | 0.14  | 13,135 (1.0)   | <11       | 0.06  |
| Attention deficit hyperactivity disorder         | 10,118 (0.8)   | 25 (8.2)   | 0.36  | 10,118 (0.8)   | 18 (7.7)   | 0.35  | 10,118 (0.8)   | <11       | 0.22  |
| Delirium                                         | 698 (0.1)      | <11        | -0.03 | 698 (0.1)      | <11        | 0.12  | 698 (0.1)      | <11       | 0.17  |
| Other psychiatric disorders                      | 15,150 (1.1)   | 23 (7.5)   | 0.32  | 15,150 (1.1)   | 22 (9.4)   | 0.37  | 15,150 (1.1)   | <11       | 0.22  |
| Alcohol abuse or dependence                      | 6,754 (0.5)    | 14 (4.6)   | 0.26  | 6,754 (0.5)    | 13 (5.5)   | 0.30  | 6,754 (0.5)    | <11       | 0.24  |
| Drug abuse or dependence                         | 16,378 (1.2)   | 27 (8.9)   | 0.35  | 16,378 (1.2)   | 34 (14.5)  | 0.51  | 16,378 (1.2)   | 15 (12.2) | 0.45  |
| Chronic fatigue syndrome                         | 36,215 (2.7)   | 18 (5.9)   | 0.16  | 36,215 (2.7)   | 12 (5.1)   | 0.12  | 36,215 (2.7)   | <11       | 0.18  |
| Sleep disorder                                   | 7,945 (0.6)    | 14 (4.6)   | 0.25  | 7,945 (0.6)    | <11        | 0.18  | 7,945 (0.6)    | <11       | 0.19  |
| Epilepsy or convulsions                          | 3,894 (0.3)    | <11        | 0.14  | 3,894 (0.3)    | <11        | 0.19  | 3,894 (0.3)    | <11       | 0.14  |
| Pain conditions <sup>3</sup>                     | 183,219 (13.8) | 86 (28.2)  | 0.36  | 183,219 (13.8) | 60 (25.5)  | 0.30  | 183,219 (13.8) | 38 (30.9) | 0.42  |
| Migraine or headache                             | 88,074 (6.7)   | 41 (13.4)  | 0.23  | 88,074 (6.7)   | 38 (16.2)  | 0.30  | 88,074 (6.7)   | 20 (16.3) | 0.30  |
| <b>Chronic maternal illness, N (%)</b>           |                |            |       |                |            |       |                |           |       |
| Hypertension                                     | 24,529 (1.9)   | <11        | 0.07  | 24,529 (1.9)   | <11        | 0.02  | 24,529 (1.9)   | <11       | 0.23  |
| Diabetes                                         | 23,287 (1.8)   | <11        | 0.10  | 23,287 (1.8)   | <11        | -0.19 | 23,287 (1.8)   | <11       | 0.24  |
| Renal disease                                    | 3,795 (0.3)    | <11        | 0.09  | 3,795 (0.3)    | <11        | 0.07  | 3,795 (0.3)    | <11       | -0.08 |
| Obesity or overweight                            | 22,123 (1.7)   | <11        | 0.07  | 22,123 (1.7)   | <11        | 0.06  | 22,123 (1.7)   | <11       | 0.14  |
| Smoking                                          | 38,975 (2.9)   | 21 (6.9)   | 0.18  | 38,975 (2.9)   | 22 (9.4)   | 0.27  | 38,975 (2.9)   | <11       | 0.17  |
| <b>Psychotropic and other medications, N (%)</b> |                |            |       |                |            |       |                |           |       |
| Antidepressants                                  | 106,412 (8.0)  | 188 (61.6) | 1.36  | 106,412 (8.0)  | 163 (69.4) | 1.62  | 106,412 (8.0)  | 80 (65.0) | 1.46  |
| Antipsychotics                                   | 12,366 (0.9)   | 126 (41.3) | 1.14  | 12,366 (0.9)   | 110 (46.8) | 1.27  | 12,366 (0.9)   | 72 (58.5) | 1.62  |
| Benzodiazepines                                  | 34,932 (2.6)   | 93 (30.5)  | 0.81  | 34,932 (2.6)   | 72 (30.6)  | 0.81  | 34,932 (2.6)   | 42 (34.2) | 0.89  |
| Other anxiolytics                                | 4,288 (0.3)    | 14 (4.6)   | 0.28  | 4,288 (0.3)    | 12 (5.1)   | 0.30  | 4,288 (0.3)    | <11       | 0.26  |
| Other hypnotics                                  | 43,150 (3.3)   | 56 (18.4)  | 0.50  | 43,150 (3.3)   | 39 (16.6)  | 0.46  | 43,150 (3.3)   | 19 (15.5) | 0.43  |
| Barbiturates                                     | 12,269 (0.9)   | 12 (3.9)   | 0.20  | 12,269 (0.9)   | <11        | 0.10  | 12,269 (0.9)   | <11       | 0.20  |
| Stimulants                                       | 7,842 (0.6)    | 26 (8.5)   | 0.39  | 7,842 (0.6)    | 16 (6.8)   | 0.33  | 7,842 (0.6)    | 12 (9.8)  | 0.42  |
| Opioids                                          | 249,821 (18.9) | 120 (39.3) | 0.46  | 249,821 (18.9) | 77 (32.8)  | 0.32  | 249,821 (18.9) | 56 (45.5) | 0.59  |
| Triptans                                         | 12,174 (0.9)   | 13 (4.3)   | 0.21  | 12,174 (0.9)   | <11        | 0.13  | 12,174 (0.9)   | <11       | -0.01 |
| Nonsteroidal anti-inflammatory drugs             | 211,001 (15.9) | 83 (27.2)  | 0.28  | 211,001 (15.9) | 58 (24.7)  | 0.22  | 211,001 (15.9) | 25 (20.3) | 0.11  |
| Antihypertensive medications                     | 27,316 (2.1)   | 20 (6.6)   | 0.22  | 27,316 (2.1)   | 17 (7.2)   | 0.25  | 27,316 (2.1)   | 11 (8.9)  | 0.30  |

|                                                      |              |           |       |              |            |       |              |             |       |
|------------------------------------------------------|--------------|-----------|-------|--------------|------------|-------|--------------|-------------|-------|
| Non-insulin antidiabetic medications                 | 8,681 (0.7)  | <11       | 0.09  | 8,681 (0.7)  | <11        | -0.11 | 8,681 (0.7)  | <11         | 0.23  |
| Insulin                                              | 9,554 (0.7)  | <11       | 0.03  | 9,554 (0.7)  | <11        | -0.04 | 9,554 (0.7)  | <11         | 0.14  |
| Corticosteroids                                      | 75,693 (5.7) | 31 (10.2) | 0.16  | 75,693 (5.7) | 26 (11.1)  | 0.19  | 75,693 (5.7) | 16 (13.0)   | 0.25  |
| Fluconazole                                          | 22,091 (1.7) | 16 (5.3)  | 0.20  | 22,091 (1.7) | <11        | 0.11  | 22,091 (1.7) | <11         | 0.00  |
| Other teratogens <sup>4</sup>                        | 16,321 (1.2) | <11       | 0.03  | 16,321 (1.2) | <11        | 0.04  | 16,321 (1.2) | <11         | 0.03  |
| Methadone                                            | 595 (0.0)    | <11       | 0.10  | 595 (0.0)    | <11        | -0.03 | 595 (0.0)    | <11         | -0.03 |
| Buprenorphine                                        | 1,068 (0.1)  | <11       | 0.17  | 1,068 (0.1)  | <11        | 0.07  | 1,068 (0.1)  | <11         | -0.04 |
| Naltrexone                                           | 65 (0.0)     | <11       | -0.01 | 65 (0.0)     | <11        | 0.09  | 65 (0.0)     | <11         | -0.01 |
| Naloxone                                             | 1,215 (0.1)  | <11       | 0.20  | 1,215 (0.1)  | <11        | 0.07  | 1,215 (0.1)  | <11         | -0.04 |
| <b>Markers of burden of disease</b>                  |              |           |       |              |            |       |              |             |       |
| Obstetric Comorbidity Index <sup>5</sup> , mean (SD) | 0.9 (1.4)    | 1.4 (1.6) | 0.33  | 0.9 (1.4)    | 1.6 (1.9)  | 0.46  | 0.9 (1.4)    | 2.0 (1.9)   | 0.65  |
| Number of distinct prescriptions, mean (SD)          | 1.6 (2.3)    | 4.6 (3.9) | 0.93  | 1.6 (2.3)    | 4.2 (3.7)  | 0.85  | 1.6 (2.3)    | 4.7 (3.2)   | 1.09  |
| Number of diagnoses, mean (SD)                       | 2.5 (3.1)    | 5.6 (4.6) | 0.77  | 2.5 (3.1)    | 5.1 (4.5)  | 0.67  | 2.5 (3.1)    | 5.3 (4.3)   | 0.74  |
| Number of outpatient physician visits, mean (SD)     | 2.8 (4.0)    | 7.9 (8.2) | 0.79  | 2.8 (4.0)    | 8.3 (11.1) | 0.66  | 2.8 (4.0)    | 10.2 (10.8) | 0.92  |
| Patients hospitalized, N (%)                         | 48,294 (3.7) | 27 (8.9)  | 0.22  | 48,294 (3.7) | 21 (8.9)   | 0.22  | 48,294 (3.7) | 12 (9.8)    | 0.25  |
| Number of hospitalizations, mean (SD)                | 0.0 (0.2)    | 0.1 (0.6) | 0.21  | 0.0 (0.2)    | 0.1 (0.4)  | 0.22  | 0.0 (0.2)    | 0.1 (0.4)   | 0.23  |
| Number of days hospitalized, mean (SD)               | 0.1 (0.9)    | 0.7 (3.6) | 0.20  | 0.1 (0.9)    | 0.6 (2.3)  | 0.26  | 0.1 (0.9)    | 0.7 (2.9)   | 0.26  |
| Number of emergency room visits, mean (SD)           | 0.3 (0.8)    | 0.9 (4.1) | 0.22  | 0.3 (0.8)    | 0.7 (1.4)  | 0.35  | 0.3 (0.8)    | 0.6 (1.3)   | 0.30  |

St. Diff.: Standardized differences, i.e., the difference in means or proportions divided by the pooled standard deviation [Austin PC. Balance diagnostics for comparing the distribution of baseline covariates between treatment groups in propensity-score matched samples. *Statistics in medicine* 2009;28:3083-107]

<sup>1</sup>In accordance with the data use agreement, we do not report information for frequency cells with less than 11 cases. These are noted as <11

<sup>2</sup>Other race includes Asian, Native American, Other, and Unknown

<sup>3</sup>Pain conditions include neuropathic and non-neuropathic conditions

<sup>4</sup>Other teratogens include methimazole, danazol, propylthiouracil, and progestins

<sup>5</sup>The obstetric comorbidity index predicts severe maternal morbidity. The range for the maternal comorbidity index is 0 to 45, with lower values associated with lower burden of maternal illness and higher values associated with higher burden of maternal illness [Bateman BT, Mhyre JM, Hernandez-Diaz S, Huybrechts KF, Fischer MA, Creanga AA, Callaghan WM, Gagne JJ. Development of a comorbidity index for use in obstetric patients. *Obstet Gynecol.* 2013;122:957-65]

**Table S7. Propensity-score-adjusted baseline characteristics of exposed and unexposed pregnant women by dose tertiles of the first lithium prescription filled during the first trimester<sup>1</sup>**

| Baseline characteristics                              | Non-exposed<br>(N=955,873) | Lithium<br>≤600<br>mg/day<br>(N=305) | St.<br>Diff. | Non-exposed<br>(N=997,007) | Lithium<br>601-900<br>mg/day<br>(N=235) | St.<br>Diff. | Non-exposed<br>(N=641,249) | Lithium<br>>900<br>mg/day<br>(N=123) | St.<br>Diff. |
|-------------------------------------------------------|----------------------------|--------------------------------------|--------------|----------------------------|-----------------------------------------|--------------|----------------------------|--------------------------------------|--------------|
| Age, mean (SD)                                        | 25.2 (6.1)                 | 25.3 (5.9)                           | 0.01         | 25.7 (6.2)                 | 25.8 (6.2)                              | 0.01         | 26.3 (6.6)                 | 26.3 (6.4)                           | -0.01        |
| Race                                                  |                            |                                      |              |                            |                                         |              |                            |                                      |              |
| White                                                 | 764,695 (80.0)             | 237 (77.7)                           | -0.06        | 731,938 (73.4)             | 169 (71.9)                              | -0.03        | 445,970 (69.6)             | 84 (68.3)                            | -0.03        |
| Black                                                 | 97,076 (10.2)              | 35 (11.5)                            | 0.04         | 147,876 (14.8)             | 37 (15.7)                               | 0.03         | 85,705 (13.4)              | 17 (13.8)                            | 0.01         |
| Hispanic                                              | 32,699 (3.4)               | 13 (4.3)                             | 0.04         | 50,877 (5.1)               | 13 (5.5)                                | 0.02         | 48,988 (7.6)               | <11                                  | 0.02         |
| Other <sup>2</sup>                                    | 61,404 (6.4)               | 20 (6.6)                             | 0.01         | 66,315 (6.7)               | 16 (6.8)                                | 0.01         | 60,586 (9.5)               | 12 (9.8)                             | 0.01         |
| Year                                                  |                            |                                      |              |                            |                                         |              |                            |                                      |              |
| 2000                                                  | <11                        | <11                                  | 0.00         | 7,794 (0.8)                | <11                                     | -0.05        | 0 (0.0)                    | <11                                  | 0.00         |
| 2001                                                  | 45,637 (4.8)               | 14 (4.6)                             | -0.01        | 62,812 (6.3)               | 13 (5.5)                                | -0.03        | 43,639 (6.8)               | <11                                  | -0.05        |
| 2002                                                  | 63,895 (6.7)               | 22 (7.2)                             | 0.02         | 43,324 (4.3)               | 11 (4.7)                                | 0.02         | 36,528 (5.7)               | <11                                  | 0.03         |
| 2003                                                  | 95,718 (10.0)              | 30 (9.8)                             | -0.01        | 88,639 (8.9)               | 21 (8.9)                                | 0.00         | 80,363 (12.5)              | 16 (13.0)                            | 0.01         |
| 2004                                                  | 118,634 (12.4)             | 38 (12.5)                            | 0.00         | 117,106 (11.7)             | 28 (11.9)                               | 0.01         | 89,087 (13.9)              | 17 (13.8)                            | 0.00         |
| 2005                                                  | 103,944 (10.9)             | 34 (11.1)                            | 0.01         | 119,701 (12.0)             | 29 (12.3)                               | 0.01         | 33,679 (5.3)               | <11                                  | -0.02        |
| 2006                                                  | 101,802 (10.7)             | 32 (10.5)                            | -0.01        | 98,699 (9.9)               | 24 (10.2)                               | 0.01         | 82,054 (12.8)              | 16 (13.0)                            | 0.01         |
| 2007                                                  | 109,175 (11.4)             | 34 (11.1)                            | -0.01        | 101,584 (10.2)             | 24 (10.2)                               | 0.00         | 72,020 (11.2)              | 15 (12.2)                            | 0.03         |
| 2008                                                  | 98,460 (10.3)              | 31 (10.2)                            | 0.00         | 132,070 (13.2)             | 33 (14.0)                               | 0.02         | 64,307 (10.0)              | 13 (10.6)                            | 0.02         |
| 2009                                                  | 127,477 (13.3)             | 41 (13.4)                            | 0.00         | 136,216 (13.7)             | 31 (13.2)                               | -0.01        | 78,018 (12.2)              | 14 (11.4)                            | -0.02        |
| 2010                                                  | 91,131 (9.5)               | 29 (9.5)                             | 0.00         | 89,063 (8.9)               | 20 (8.5)                                | -0.01        | 61,554 (9.6)               | 11 (8.9)                             | -0.02        |
| Multiple gestation                                    | 20,756 (2.2)               | <11                                  | -0.01        | 21,610 (2.2)               | <11                                     | 0.00         | 31,950 (5.0)               | <11                                  | 0.00         |
| <b>Psychiatric and neurological conditions, N (%)</b> |                            |                                      |              |                            |                                         |              |                            |                                      |              |
| Bipolar disorder                                      | 584,852 (61.2)             | 188 (61.6)                           | 0.01         | 668,721 (67.1)             | 157 (66.8)                              | -0.01        | 482,477 (75.2)             | 91 (74.0)                            | -0.03        |
| Depression                                            | 275,529 (28.8)             | 82 (26.9)                            | -0.04        | 266,462 (26.7)             | 59 (25.1)                               | -0.04        | 141,148 (22.0)             | 26 (21.1)                            | -0.02        |
| Anxiety                                               | 192,671 (20.2)             | 59 (19.3)                            | -0.02        | 187,444 (18.8)             | 42 (17.9)                               | -0.02        | 95,934 (15.0)              | 16 (13.0)                            | -0.06        |
| Schizophrenia                                         | 31,366 (3.3)               | 12 (3.9)                             | 0.04         | 50,156 (5.0)               | 15 (6.4)                                | 0.06         | 26,074 (4.1)               | <11                                  | 0.04         |
| Other psychosis                                       | 21,751 (2.3)               | <11                                  | 0.02         | 35,906 (3.6)               | <11                                     | 0.03         | 35,823 (5.6)               | <11                                  | 0.00         |

|                                                  |                |            |       |                |            |       |                |           |       |
|--------------------------------------------------|----------------|------------|-------|----------------|------------|-------|----------------|-----------|-------|
| Personality disorder                             | 43,453 (4.5)   | 17 (5.6)   | 0.05  | 48,327 (4.8)   | 13 (5.5)   | 0.03  | 28,540 (4.5)   | <11       | 0.02  |
| Adjustment disorder                              | 42,203 (4.4)   | 12 (3.9)   | -0.02 | 34,729 (3.5)   | <11        | -0.03 | 10,834 (1.7)   | <11       | 0.00  |
| Attention deficit hyperactivity disorder         | 80,545 (8.4)   | 25 (8.2)   | -0.01 | 78,239 (7.8)   | 18 (7.7)   | -0.01 | 29,358 (4.6)   | <11       | -0.03 |
| Delirium                                         | <11            | <11        | 0.00  | 7,292 (0.7)    | <11        | 0.01  | 10,377 (1.6)   | <11       | 0.00  |
| Other psychiatric disorders                      | 68,895 (7.2)   | 23 (7.5)   | 0.01  | 90,013 (9.0)   | 22 (9.4)   | 0.01  | 33,203 (5.2)   | <11       | -0.01 |
| Alcohol abuse or dependence                      | 39,066 (4.1)   | 14 (4.6)   | 0.02  | 49,308 (4.9)   | 13 (5.5)   | 0.03  | 21,124 (3.3)   | <11       | 0.04  |
| Drug abuse or dependence                         | 80,846 (8.5)   | 27 (8.9)   | 0.01  | 130,956 (13.1) | 34 (14.5)  | 0.04  | 75,279 (11.7)  | 15 (12.2) | 0.01  |
| Chronic fatigue syndrome                         | 59,801 (6.3)   | 18 (5.9)   | -0.01 | 54,450 (5.5)   | 12 (5.1)   | -0.02 | 43,849 (6.8)   | <11       | -0.01 |
| Sleep disorder                                   | 45,322 (4.7)   | 14 (4.6)   | -0.01 | 34,196 (3.4)   | <11        | -0.03 | 27,181 (4.2)   | <11       | -0.05 |
| Epilepsy or convulsions                          | 14,680 (1.5)   | <11        | 0.01  | 21,429 (2.2)   | <11        | 0.03  | 11,290 (1.8)   | <11       | -0.01 |
| Pain conditions <sup>3</sup>                     | 278,856 (29.2) | 86 (28.2)  | -0.02 | 277,175 (27.8) | 60 (25.5)  | -0.05 | 200,691 (31.3) | 38 (30.9) | -0.01 |
| Migraine or headache                             | 129,220 (13.5) | 41 (13.4)  | 0.00  | 169,009 (17.0) | 38 (16.2)  | -0.02 | 104,013 (16.2) | 20 (16.3) | 0.00  |
| <b>Chronic maternal illness, N (%)</b>           |                |            |       |                |            |       |                |           |       |
| Hypertension                                     | 27,178 (2.8)   | <11        | 0.01  | 23,643 (2.4)   | <11        | -0.02 | 38,978 (6.1)   | <11       | 0.02  |
| Diabetes                                         | 33,883 (3.5)   | <11        | -0.01 | 74 (0.0)       | <11        | -0.01 | 47,888 (7.5)   | <11       | -0.04 |
| Renal disease                                    | 7,087 (0.7)    | <11        | 0.03  | 8,333 (0.8)    | <11        | 0.00  | 24 (0.0)       | <11       | -0.01 |
| Obesity or overweight                            | 26,146 (2.7)   | <11        | -0.01 | 28,307 (2.8)   | <11        | -0.02 | 24,950 (3.9)   | <11       | 0.01  |
| Smoking                                          | 70,125 (7.3)   | 21 (6.9)   | -0.02 | 94,824 (9.5)   | 22 (9.4)   | -0.01 | 43,368 (6.8)   | <11       | -0.01 |
| <b>Psychotropic and other medications, N (%)</b> |                |            |       |                |            |       |                |           |       |
| Antidepressants                                  | 624,836 (65.4) | 188 (61.6) | -0.08 | 723,884 (72.6) | 163 (69.4) | -0.07 | 424,413 (66.2) | 80 (65.0) | -0.02 |
| Antipsychotics                                   | 356,163 (37.3) | 126 (41.3) | 0.08  | 420,697 (42.2) | 110 (46.8) | 0.09  | 354,348 (55.3) | 72 (58.5) | 0.07  |
| Benzodiazepines                                  | 277,948 (29.1) | 93 (30.5)  | 0.03  | 300,200 (30.1) | 72 (30.6)  | 0.01  | 209,106 (32.6) | 42 (34.1) | 0.03  |
| Other anxiolytics                                | 39,221 (4.1)   | 14 (4.6)   | 0.02  | 46,798 (4.7)   | 12 (5.1)   | 0.02  | 22,737 (3.5)   | <11       | 0.03  |
| Other hypnotics                                  | 169,279 (17.7) | 56 (18.4)  | 0.02  | 157,485 (15.8) | 39 (16.6)  | 0.02  | 99,439 (15.5)  | 19 (15.4) | 0.00  |
| Barbiturates                                     | 34,052 (3.6)   | 12 (3.9)   | 0.02  | 20,339 (2.0)   | <11        | 0.01  | 23,955 (3.7)   | <11       | 0.02  |
| Stimulants                                       | 79,041 (8.3)   | 26 (8.5)   | 0.01  | 69,897 (7.0)   | 16 (6.8)   | -0.01 | 56,874 (8.9)   | 12 (9.8)  | 0.03  |
| Opioids                                          | 387,251 (40.5) | 120 (39.3) | -0.02 | 345,545 (34.7) | 77 (32.8)  | -0.04 | 301,456 (47.0) | 56 (45.5) | -0.03 |
| Triptans                                         | 43,037 (4.5)   | 13 (4.3)   | -0.01 | 28,347 (2.8)   | <11        | -0.02 | 6,025 (0.9)    | <11       | -0.01 |
| Nonsteroidal anti-inflammatory drugs             | 266,122 (27.8) | 83 (27.2)  | -0.01 | 260,194 (26.1) | 58 (24.7)  | -0.03 | 141,628 (22.1) | 25 (20.3) | -0.04 |
| Antihypertensive medications                     | 56,743 (5.9)   | 20 (6.6)   | 0.03  | 74,937 (7.5)   | 17 (7.2)   | -0.01 | 59,739 (9.3)   | 11 (8.9)  | -0.01 |

|                                                      |               |           |       |                |            |       |               |             |                   |
|------------------------------------------------------|---------------|-----------|-------|----------------|------------|-------|---------------|-------------|-------------------|
| Non-insulin antidiabetic medications                 | 16,100 (1.7)  | <11       | 0.00  | 47 (0.0)       | <11        | -0.01 | 32,256 (5.0)  | <11         | -0.05             |
| Insulin                                              | 10,686 (1.1)  | <11       | -0.01 | 4,589 (0.5)    | <11        | -0.01 | 15,335 (2.4)  | <11         | 0.00              |
| Corticosteroids                                      | 98,487 (10.3) | 31 (10.2) | 0.00  | 117,411 (11.8) | 26 (11.1)  | -0.02 | 82,105 (12.8) | 16 (13.0)   | 0.01              |
| Fluconazole                                          | 52,475 (5.5)  | 16 (5.3)  | -0.01 | 32,644 (3.3)   | <11        | 0.01  | 11,193 (1.7)  | <11         | -0.01             |
| Other teratogens <sup>4</sup>                        | 15,847 (1.7)  | <11       | 0.00  | 16,155 (1.6)   | <11        | 0.01  | 11,268 (1.8)  | <11         | -0.01             |
| Methadone                                            | 5,034 (0.5)   | <11       | 0.02  | 14 (0.0)       | <11        | -0.01 | <11           | <11         | -0.01             |
| Buprenorphine                                        | 11,763 (1.2)  | <11       | 0.03  | 4,578 (0.5)    | <11        | -0.01 | 13 (0.0)      | <11         | -0.01             |
| Naltrexone                                           | <11           | <11       | 0.00  | 3,744 (0.4)    | <11        | 0.01  | <11           | <11         | 0.00              |
| Naloxone                                             | 15,937 (1.7)  | <11       | 0.05  | 4,762 (0.5)    | <11        | -0.01 | 42 (0.0)      | <11         | -0.01             |
| <b>Markers of burden of disease</b>                  |               |           |       |                |            |       |               |             |                   |
| Obstetric Comorbidity Index <sup>5</sup> , mean (SD) | 1.4 (1.7)     | 1.4 (1.6) | -0.01 | 1.6 (1.7)      | 1.6 (1.9)  | 0.04  | 2.0 (1.9)     | 2.0 (1.9)   | 0.00              |
| Number of distinct prescriptions, mean (SD)          | 4.6 (3.7)     | 4.6 (3.9) | -0.01 | 4.4 (3.6)      | 4.2 (3.7)  | -0.05 | 4.9 (3.7)     | 4.7 (3.2)   | -0.08             |
| Number of diagnoses, mean (SD)                       | 5.7 (4.5)     | 5.6 (4.6) | -0.03 | 5.4 (4.6)      | 5.1 (4.5)  | -0.07 | 5.6 (4.4)     | 5.3 (4.2)   | -0.06             |
| Number of outpatient physician visits, mean (SD)     | 7.7 (7.7)     | 7.9 (8.2) | 0.02  | 7.9 (8.9)      | 8.3 (11.1) | 0.04  | 8.9 (9.7)     | 10.2 (10.7) | 0.13 <sup>6</sup> |
| Patients hospitalized, N (%)                         | 79,770 (8.3)  | 27 (8.9)  | 0.02  | 84,509 (8.5)   | 21 (8.9)   | 0.02  | 57,551 (9.0)  | 12 (9.8)    | 0.03              |
| Number of hospitalizations, mean (SD)                | 0.1 (0.4)     | 0.1 (0.6) | 0.05  | 0.1 (0.4)      | 0.1 (0.4)  | 0.03  | 0.1 (0.4)     | 0.1 (0.4)   | 0.04              |
| Number of days hospitalized, mean (SD)               | 0.4 (2.0)     | 0.7 (3.6) | 0.08  | 0.5 (2.0)      | 0.6 (2.3)  | 0.06  | 0.4 (1.8)     | 0.7 (2.9)   | 0.10 <sup>7</sup> |
| Number of emergency room visits, mean (SD)           | 0.8 (1.5)     | 0.9 (4.1) | 0.06  | 0.7 (1.7)      | 0.7 (1.4)  | -0.03 | 0.8 (2.4)     | 0.6 (1.3)   | -0.08             |

St. Diff.: Standardized differences, i.e., the difference in means or proportions divided by the pooled standard deviation [Austin PC. Balance diagnostics for comparing the distribution of baseline covariates between treatment groups in propensity-score matched samples. *Statistics in medicine* 2009;28:3083-107]

<sup>1</sup>In accordance with the data use agreement, we do not report information for frequency cells with less than 11 cases. These are noted as <11

<sup>2</sup>Other race includes Asian, Native American, Other, and Unknown

<sup>3</sup>Pain conditions include neuropathic and non-neuropathic conditions

<sup>4</sup>Other teratogens include methimazole, danazol, propylthiouracil, and progestins

<sup>5</sup>The obstetric comorbidity index predicts severe maternal morbidity. The range for the maternal comorbidity index is 0 to 45, with lower values associated with lower burden of maternal illness and higher values associated with higher burden of maternal illness [Bateman BT, Mhyre JM, Hernandez-Diaz S, Huybrechts KF, Fischer MA, Creanga AA, Callaghan WM, Gagne JJ. Development of a comorbidity index for use in obstetric patients. *Obstet Gynecol.* 2013;122:957-65]

<sup>6</sup>The covariate “number of outpatient physician visits” was included in the propensity score model as a categorical covariate (quartiles). Quartiles of number of physician visits were balanced with standardized differences <0.1

<sup>7</sup>The covariate “number of days hospitalized” was included in the propensity score model as a categorical covariate (quartiles). Quartiles of number of physician visits were balanced with standardized differences <0.1

**Table S8. Unadjusted baseline characteristics of exposed and unexposed pregnant women by dose tertiles of the first lamotrigine prescription filled during the first trimester<sup>1</sup>**

| Baseline characteristics                              | Lamotrigine                  |                            |              | Lamotrigine                  |                              |              | Lamotrigine                  |                           |              |
|-------------------------------------------------------|------------------------------|----------------------------|--------------|------------------------------|------------------------------|--------------|------------------------------|---------------------------|--------------|
|                                                       | Non-exposed<br>(N=1,322,955) | <=100<br>mg/day<br>(N=904) | St.<br>Diff. | Non-exposed<br>(N=1,322,955) | 101-200<br>mg/day<br>(N=620) | St.<br>Diff. | Non-exposed<br>(N=1,322,955) | >200<br>mg/day<br>(N=421) | St.<br>Diff. |
| Age, mean (SD)                                        | 24.0 (5.8)                   | 25.0 (5.7)                 | 0.18         | 24.0 (5.8)                   | 25.4 (5.9)                   | 0.23         | 24.0 (5.8)                   | 25.3 (5.8)                | 0.22         |
| Race                                                  |                              |                            |              |                              |                              |              |                              |                           |              |
| White                                                 | 526,603 (39.8)               | 674 (74.6)                 | 0.75         | 526,603 (39.8)               | 487 (78.5)                   | 0.86         | 526,603 (39.8)               | 285 (67.7)                | 0.58         |
| Black                                                 | 445,675 (33.7)               | 115 (12.7)                 | -0.51        | 445,675 (33.7)               | 70 (11.3)                    | -0.56        | 445,675 (33.7)               | 58 (13.8)                 | -0.48        |
| Hispanic                                              | 195,174 (14.8)               | 45 (5.0)                   | -0.33        | 195,174 (14.8)               | 26 (4.2)                     | -0.37        | 195,174 (14.8)               | 36 (8.6)                  | -0.19        |
| Other <sup>2</sup>                                    | 155,503 (11.8)               | 70 (7.7)                   | -0.14        | 155,503 (11.8)               | 37 (6.0)                     | -0.20        | 155,503 (11.8)               | 42 (10.0)                 | -0.06        |
| Year                                                  |                              |                            |              |                              |                              |              |                              |                           |              |
| 2000                                                  | 1,569 (0.1)                  | <11                        | -0.05        | 1,569 (0.1)                  | <11                          | -0.05        | 1,569 (0.1)                  | <11                       | -0.05        |
| 2001                                                  | 81,024 (6.1)                 | <11                        | -0.31        | 81,024 (6.1)                 | <11                          | -0.33        | 81,024 (6.1)                 | <11                       | -0.20        |
| 2002                                                  | 92,771 (7.0)                 | <11                        | -0.31        | 92,771 (7.0)                 | <11                          | -0.36        | 92,771 (7.0)                 | <11                       | -0.25        |
| 2003                                                  | 126,822 (9.6)                | 11 (1.2)                   | -0.38        | 126,822 (9.6)                | <11                          | -0.39        | 126,822 (9.6)                | <11                       | -0.32        |
| 2004                                                  | 153,523 (11.6)               | 43 (4.8)                   | -0.25        | 153,523 (11.6)               | 25 (4.0)                     | -0.28        | 153,523 (11.6)               | 29 (6.9)                  | -0.16        |
| 2005                                                  | 154,733 (11.7)               | 64 (7.1)                   | -0.16        | 154,733 (11.7)               | 57 (9.2)                     | -0.08        | 154,733 (11.7)               | 33 (7.8)                  | -0.13        |
| 2006                                                  | 154,415 (11.7)               | 103 (11.4)                 | -0.01        | 154,415 (11.7)               | 63 (10.2)                    | -0.05        | 154,415 (11.7)               | 58 (13.8)                 | 0.06         |
| 2007                                                  | 146,133 (11.0)               | 121 (13.4)                 | 0.07         | 146,133 (11.0)               | 102 (16.5)                   | 0.16         | 146,133 (11.0)               | 63 (15.0)                 | 0.12         |
| 2008                                                  | 143,246 (10.8)               | 180 (19.9)                 | 0.25         | 143,246 (10.8)               | 115 (18.6)                   | 0.22         | 143,246 (10.8)               | 58 (13.8)                 | 0.09         |
| 2009                                                  | 149,472 (11.3)               | 206 (22.8)                 | 0.31         | 149,472 (11.3)               | 134 (21.6)                   | 0.28         | 149,472 (11.3)               | 96 (22.8)                 | 0.31         |
| 2010                                                  | 119,247 (9.0)                | 161 (17.8)                 | 0.26         | 119,247 (9.0)                | 114 (18.4)                   | 0.28         | 119,247 (9.0)                | 58 (13.8)                 | 0.15         |
| Multiple gestation                                    | 44,792 (3.4)                 | 41 (4.5)                   | 0.06         | 44,792 (3.4)                 | 21 (3.4)                     | 0.00         | 44,792 (3.4)                 | 21 (5.0)                  | 0.08         |
| <b>Psychiatric and neurological conditions, N (%)</b> |                              |                            |              |                              |                              |              |                              |                           |              |
| Bipolar disorder                                      | 9,485 (0.7)                  | 406 (44.9)                 | 1.24         | 9,485 (0.7)                  | 287 (46.3)                   | 1.27         | 9,485 (0.7)                  | 105 (24.9)                | 0.78         |
| Depression                                            | 63,110 (4.8)                 | 239 (26.4)                 | 0.63         | 63,110 (4.8)                 | 102 (16.5)                   | 0.39         | 63,110 (4.8)                 | 61 (14.5)                 | 0.33         |
| Anxiety                                               | 41,759 (3.2)                 | 184 (20.4)                 | 0.55         | 41,759 (3.2)                 | 104 (16.8)                   | 0.47         | 41,759 (3.2)                 | 55 (13.1)                 | 0.37         |



|                                                  |                |            |      |                |            |      |                |            |       |
|--------------------------------------------------|----------------|------------|------|----------------|------------|------|----------------|------------|-------|
| Schizophrenia                                    | 1,639 (0.1)    | 17 (1.9)   | 0.18 | 1,639 (0.1)    | <11        | 0.13 | 1,639 (0.1)    | <11        | 0.13  |
| Other psychosis                                  | 2,138 (0.2)    | 13 (1.4)   | 0.14 | 2,138 (0.2)    | <11        | 0.08 | 2,138 (0.2)    | <11        | 0.02  |
| Personality disorder                             | 2,160 (0.2)    | 35 (3.9)   | 0.27 | 2,160 (0.2)    | 27 (4.4)   | 0.28 | 2,160 (0.2)    | <11        | 0.13  |
| Adjustment disorder                              | 13,135 (1.0)   | 33 (3.7)   | 0.18 | 13,135 (1.0)   | 13 (2.1)   | 0.09 | 13,135 (1.0)   | <11        | 0.06  |
| Attention deficit hyperactivity disorder         | 10,118 (0.8)   | 77 (8.5)   | 0.37 | 10,118 (0.8)   | 46 (7.4)   | 0.34 | 10,118 (0.8)   | <11        | 0.13  |
| Delirium                                         | 698 (0.1)      | <11        | 0.09 | 698 (0.1)      | <11        | 0.08 | 698 (0.1)      | <11        | 0.11  |
| Other psychiatric disorders                      | 15,150 (1.1)   | 66 (7.3)   | 0.31 | 15,150 (1.1)   | 35 (5.7)   | 0.25 | 15,150 (1.1)   | 17 (4.0)   | 0.18  |
| Alcohol abuse or dependence                      | 6,754 (0.5)    | 21 (2.3)   | 0.15 | 6,754 (0.5)    | <11        | 0.11 | 6,754 (0.5)    | <11        | 0.05  |
| Drug abuse or dependence                         | 16,378 (1.2)   | 59 (6.5)   | 0.28 | 16,378 (1.2)   | 26 (4.2)   | 0.18 | 16,378 (1.2)   | 16 (3.8)   | 0.16  |
| Chronic fatigue syndrome                         | 36,215 (2.7)   | 60 (6.6)   | 0.19 | 36,215 (2.7)   | 47 (7.6)   | 0.22 | 36,215 (2.7)   | 17 (4.0)   | 0.07  |
| Sleep disorder                                   | 7,945 (0.6)    | 37 (4.1)   | 0.23 | 7,945 (0.6)    | 27 (4.4)   | 0.24 | 7,945 (0.6)    | 15 (3.6)   | 0.21  |
| Epilepsy or convulsions                          | 3,894 (0.3)    | 85 (9.4)   | 0.43 | 3,894 (0.3)    | 110 (17.7) | 0.64 | 3,894 (0.3)    | 189 (44.9) | 1.26  |
| Pain conditions <sup>3</sup>                     | 183,219 (13.8) | 311 (34.4) | 0.49 | 183,219 (13.8) | 221 (35.6) | 0.52 | 183,219 (13.8) | 114 (27.1) | 0.33  |
| Migraine or headache                             | 88,074 (6.7)   | 143 (15.8) | 0.29 | 88,074 (6.7)   | 95 (15.3)  | 0.28 | 88,074 (6.7)   | 70 (16.6)  | 0.31  |
| <b>Chronic maternal illness, N (%)</b>           |                |            |      |                |            |      |                |            |       |
| Hypertension                                     | 24,529 (1.9)   | 38 (4.2)   | 0.14 | 24,529 (1.9)   | 26 (4.2)   | 0.14 | 24,529 (1.9)   | 15 (3.6)   | 0.11  |
| Diabetes                                         | 23,287 (1.8)   | 24 (2.7)   | 0.06 | 23,287 (1.8)   | 15 (2.4)   | 0.05 | 23,287 (1.8)   | <11        | -0.03 |
| Renal disease                                    | 3,795 (0.3)    | <11        | 0.04 | 3,795 (0.3)    | <11        | 0.10 | 3,795 (0.3)    | <11        | 0.08  |
| Obesity or overweight                            | 22,123 (1.7)   | 28 (3.1)   | 0.09 | 22,123 (1.7)   | 25 (4.0)   | 0.14 | 22,123 (1.7)   | <11        | 0.05  |
| Smoking                                          | 38,975 (2.9)   | 102 (11.3) | 0.33 | 38,975 (2.9)   | 51 (8.2)   | 0.23 | 38,975 (2.9)   | 28 (6.7)   | 0.17  |
| <b>Psychotropic and other medications, N (%)</b> |                |            |      |                |            |      |                |            |       |
| Antidepressants                                  | 106,412 (8.0)  | 540 (59.7) | 1.30 | 106,412 (8.0)  | 343 (55.3) | 1.18 | 106,412 (8.0)  | 156 (37.1) | 0.74  |
| Antipsychotics                                   | 12,366 (0.9)   | 285 (31.5) | 0.91 | 12,366 (0.9)   | 215 (34.7) | 0.98 | 12,366 (0.9)   | 71 (16.9)  | 0.58  |
| Benzodiazepines                                  | 34,932 (2.6)   | 240 (26.5) | 0.72 | 34,932 (2.6)   | 176 (28.4) | 0.76 | 34,932 (2.6)   | 100 (23.8) | 0.66  |
| Other anxiolytics                                | 4,288 (0.3)    | 42 (4.6)   | 0.28 | 4,288 (0.3)    | 30 (4.8)   | 0.29 | 4,288 (0.3)    | <11        | 0.18  |
| Other hypnotics                                  | 43,150 (3.3)   | 180 (19.9) | 0.54 | 43,150 (3.3)   | 119 (19.2) | 0.52 | 43,150 (3.3)   | 44 (10.5)  | 0.29  |
| Barbiturates                                     | 12,269 (0.9)   | 24 (2.7)   | 0.13 | 12,269 (0.9)   | 14 (2.3)   | 0.11 | 12,269 (0.9)   | <11        | 0.10  |
| Stimulants                                       | 7,842 (0.6)    | 111 (12.3) | 0.49 | 7,842 (0.6)    | 70 (11.3)  | 0.46 | 7,842 (0.6)    | 28 (6.7)   | 0.33  |
| Opioids                                          | 249,821 (18.9) | 365 (40.4) | 0.48 | 249,821 (18.9) | 244 (39.4) | 0.46 | 249,821 (18.9) | 143 (34.0) | 0.35  |

|                                                      |                |            |      |                |            |      |                |           |       |
|------------------------------------------------------|----------------|------------|------|----------------|------------|------|----------------|-----------|-------|
| Triptans                                             | 12,174 (0.9)   | 33 (3.7)   | 0.18 | 12,174 (0.9)   | 21 (3.4)   | 0.17 | 12,174 (0.9)   | 19 (4.5)  | 0.22  |
| Nonsteroidal anti-inflammatory drugs                 | 211,001 (15.9) | 261 (28.9) | 0.31 | 211,001 (15.9) | 157 (25.3) | 0.23 | 211,001 (15.9) | 92 (21.9) | 0.15  |
| Antihypertensive medications                         | 27,316 (2.1)   | 82 (9.1)   | 0.31 | 27,316 (2.1)   | 42 (6.8)   | 0.23 | 27,316 (2.1)   | 17 (4.0)  | 0.11  |
| Non-insulin antidiabetic medications                 | 8,681 (0.7)    | 19 (2.1)   | 0.12 | 8,681 (0.7)    | 17 (2.7)   | 0.16 | 8,681 (0.7)    | <11       | 0.08  |
| Insulin                                              | 9,554 (0.7)    | <11        | 0.03 | 9,554 (0.7)    | <11        | 0.06 | 9,554 (0.7)    | <11       | -0.03 |
| Corticosteroids                                      | 75,693 (5.7)   | 117 (12.9) | 0.25 | 75,693 (5.7)   | 72 (11.6)  | 0.21 | 75,693 (5.7)   | 37 (8.8)  | 0.12  |
| Fluconazole                                          | 22,091 (1.7)   | 43 (4.8)   | 0.18 | 22,091 (1.7)   | 25 (4.0)   | 0.14 | 22,091 (1.7)   | 13 (3.1)  | 0.09  |
| Other teratogens <sup>4</sup>                        | 16,321 (1.2)   | 27 (3.0)   | 0.12 | 16,321 (1.2)   | 21 (3.4)   | 0.14 | 16,321 (1.2)   | <11       | 0.05  |
| Methadone                                            | 595 (0.0)      | <11        | 0.08 | 595 (0.0)      | <11        | 0.06 | 595 (0.0)      | <11       | 0.05  |
| Buprenorphine                                        | 1,068 (0.1)    | <11        | 0.13 | 1,068 (0.1)    | <11        | 0.08 | 1,068 (0.1)    | <11       | 0.07  |
| Naltrexone                                           | 65 (0.0)       | <11        | 0.06 | 65 (0.0)       | <11        | 0.05 | 65 (0.0)       | <11       | 0.10  |
| Naloxone                                             | 1,215 (0.1)    | <11        | 0.13 | 1,215 (0.1)    | <11        | 0.09 | 1,215 (0.1)    | <11       | 0.07  |
| <b>Markers of burden of disease</b>                  |                |            |      |                |            |      |                |           |       |
| Obstetric Comorbidity Index <sup>5</sup> , mean (SD) | 0.9 (1.4)      | 1.5 (1.8)  | 0.36 | 0.9 (1.4)      | 1.4 (1.8)  | 0.32 | 0.9 (1.4)      | 1.2 (1.7) | 0.18  |
| Number of distinct prescriptions, mean (SD)          | 1.6 (2.3)      | 4.5 (3.7)  | 0.94 | 1.6 (2.3)      | 4.5 (3.8)  | 0.94 | 1.6 (2.3)      | 3.4 (3.6) | 0.59  |
| Number of diagnoses, mean (SD)                       | 2.5 (3.1)      | 5.6 (4.4)  | 0.81 | 2.5 (3.1)      | 5.5 (4.7)  | 0.76 | 2.5 (3.1)      | 4.9 (4.4) | 0.63  |
| Number of outpatient physician visits, mean (SD)     | 2.8 (4.0)      | 7.8 (8.7)  | 0.73 | 2.8 (4.0)      | 7.8 (9.3)  | 0.70 | 2.8 (4.0)      | 6.1 (7.9) | 0.53  |
| Patients hospitalized, N (%)                         | 48,294 (3.7)   | 57 (6.3)   | 0.12 | 48,294 (3.7)   | 31 (5.0)   | 0.07 | 48,294 (3.7)   | 27 (6.4)  | 0.13  |
| Number of hospitalizations, mean (SD)                | 0.0 (0.2)      | 0.1 (0.3)  | 0.12 | 0.0 (0.2)      | 0.1 (0.2)  | 0.05 | 0.0 (0.2)      | 0.1 (0.3) | 0.11  |
| Number of days hospitalized, mean (SD)               | 0.1 (0.9)      | 0.3 (1.7)  | 0.14 | 0.1 (0.9)      | 0.2 (0.9)  | 0.05 | 0.1 (0.9)      | 0.3 (1.4) | 0.13  |
| Number of emergency room visits, mean (SD)           | 0.3 (0.8)      | 0.9 (2.6)  | 0.30 | 0.3 (0.8)      | 0.7 (1.4)  | 0.30 | 0.3 (0.8)      | 0.5 (1.0) | 0.23  |

St. Diff.: Standardized differences, i.e., the difference in means or proportions divided by the pooled standard deviation [Austin PC. Balance diagnostics for comparing the distribution of baseline covariates between treatment groups in propensity-score matched samples. Statistics in medicine 2009;28:3083-107]

<sup>1</sup> In accordance with the data use agreement, we do not report information for frequency cells with less than 11 cases. These are noted as <11

<sup>2</sup> Other race includes Asian, Native American, Other, and Unknown

<sup>3</sup> Pain conditions include neuropathic and non-neuropathic conditions

<sup>4</sup> Other teratogens include methimazole, danazol, propylthiouracil, and progestins

<sup>5</sup> The obstetric comorbidity index predicts severe maternal morbidity. The range for the maternal comorbidity index is 0 to 45, with lower values associated with lower burden of maternal illness and higher values associated with higher burden of maternal illness [Bateman BT, Mhyre JM, Hernandez-Diaz S, Huybrechts KF, Fischer MA, Creanga AA, Callaghan WM, Gagne JJ. Development of a comorbidity index for use in obstetric patients. Obstet Gynecol. 2013;122:957-65]

**Table S9. Propensity-score-adjusted baseline characteristics of exposed and unexposed pregnant women by dose tertiles of the first lamotrigine prescription filled during the first trimester<sup>1</sup>**

| Baseline characteristics                              | Lamotrigine                  |                            |              | Lamotrigine                  |                              |              | Lamotrigine                  |                           |              |
|-------------------------------------------------------|------------------------------|----------------------------|--------------|------------------------------|------------------------------|--------------|------------------------------|---------------------------|--------------|
|                                                       | Non-exposed<br>(N=1,123,503) | <=100<br>mg/day<br>(N=904) | St.<br>Diff. | Non-exposed<br>(N=1,247,465) | 101-200<br>mg/day<br>(N=620) | St.<br>Diff. | Non-exposed<br>(N=1,238,899) | >200<br>mg/day<br>(N=421) | St.<br>Diff. |
| Age, mean (SD)                                        | 25.1 (5.7)                   | 25.0 (5.7)                 | -0.02        | 25.4 (6.0)                   | 25.4 (5.9)                   | 0.00         | 25.2 (5.8)                   | 25.3 (5.8)                | 0.02         |
| Race                                                  |                              |                            |              |                              |                              |              |                              |                           |              |
| White                                                 | 873,365 (77.7)               | 674 (74.6)                 | -0.07        | 1,002,596 (80.4)             | 487 (78.5)                   | -0.05        | 855,189 (69.0)               | 285 (67.7)                | -0.03        |
| Black                                                 | 124,690 (11.1)               | 115 (12.7)                 | 0.05         | 132,210 (10.6)               | 70 (11.3)                    | 0.02         | 171,617 (13.9)               | 58 (13.8)                 | 0.00         |
| Hispanic                                              | 43,714 (3.9)                 | 45 (5.0)                   | 0.05         | 43,813 (3.5)                 | 26 (4.2)                     | 0.04         | 97,539 (7.9)                 | 36 (8.6)                  | 0.02         |
| Other <sup>2</sup>                                    | 81,734 (7.3)                 | 70 (7.7)                   | 0.02         | 68,845 (5.5)                 | 37 (6.0)                     | 0.02         | 114,554 (9.2)                | 42 (10.0)                 | 0.02         |
| Year                                                  |                              |                            |              |                              |                              |              |                              |                           |              |
| 2000                                                  | <11                          | <11                        | 0.00         | <11                          | <11                          | 0.00         | <11                          | <11                       | 0.00         |
| 2001                                                  | 5,177 (0.5)                  | <11                        | 0.03         | 4,004 (0.3)                  | <11                          | 0.00         | 25,309 (2.0)                 | <11                       | 0.01         |
| 2002                                                  | 9,062 (0.8)                  | <11                        | 0.02         | 4,516 (0.4)                  | <11                          | -0.01        | 28,134 (2.3)                 | <11                       | -0.03        |
| 2003                                                  | 12,202 (1.1)                 | 11 (1.2)                   | 0.01         | 13,917 (1.1)                 | <11                          | -0.01        | 31,135 (2.5)                 | <11                       | -0.02        |
| 2004                                                  | 51,748 (4.6)                 | 43 (4.8)                   | 0.01         | 50,689 (4.1)                 | 25 (4.0)                     | 0.00         | 87,689 (7.1)                 | 29 (6.9)                  | -0.01        |
| 2005                                                  | 76,509 (6.8)                 | 64 (7.1)                   | 0.01         | 110,337 (8.8)                | 57 (9.2)                     | 0.01         | 95,123 (7.7)                 | 33 (7.8)                  | 0.01         |
| 2006                                                  | 130,867 (11.6)               | 103 (11.4)                 | -0.01        | 128,679 (10.3)               | 63 (10.2)                    | -0.01        | 159,865 (12.9)               | 58 (13.8)                 | 0.03         |
| 2007                                                  | 150,363 (13.4)               | 121 (13.4)                 | 0.00         | 203,883 (16.3)               | 102 (16.5)                   | 0.00         | 181,150 (14.6)               | 63 (15.0)                 | 0.01         |
| 2008                                                  | 222,844 (19.8)               | 180 (19.9)                 | 0.00         | 235,984 (18.9)               | 115 (18.6)                   | -0.01        | 174,960 (14.1)               | 58 (13.8)                 | -0.01        |
| 2009                                                  | 261,726 (23.3)               | 206 (22.8)                 | -0.01        | 271,713 (21.8)               | 134 (21.6)                   | 0.00         | 285,224 (23.0)               | 96 (22.8)                 | -0.01        |
| 2010                                                  | 203,005 (18.1)               | 161 (17.8)                 | -0.01        | 223,743 (17.9)               | 114 (18.4)                   | 0.01         | 170,310 (13.7)               | 58 (13.8)                 | 0.00         |
| Multiple gestation                                    | 52,093 (4.6)                 | 41 (4.5)                   | 0.00         | 43,064 (3.5)                 | 21 (3.4)                     | 0.00         | 62,870 (5.1)                 | 21 (5.0)                  | 0.00         |
| <b>Psychiatric and neurological conditions, N (%)</b> |                              |                            |              |                              |                              |              |                              |                           |              |
| Bipolar disorder                                      | 463,395 (41.3)               | 406 (44.9)                 | 0.07         | 576,686 (46.2)               | 287 (46.3)                   | 0.00         | 338,769 (27.3)               | 105 (24.9)                | -0.05        |
| Depression                                            | 329,301 (29.3)               | 239 (26.4)                 | -0.06        | 230,338 (18.5)               | 102 (16.5)                   | -0.05        | 185,500 (15.0)               | 61 (14.5)                 | -0.01        |
| Anxiety                                               | 241,283 (21.5)               | 184 (20.4)                 | -0.03        | 214,594 (17.2)               | 104 (16.8)                   | -0.01        | 164,578 (13.3)               | 55 (13.1)                 | -0.01        |

|                                                  |                |            |       |                |            |       |                |            |       |
|--------------------------------------------------|----------------|------------|-------|----------------|------------|-------|----------------|------------|-------|
| Schizophrenia                                    | 19,815 (1.8)   | 17 (1.9)   | 0.01  | 15,207 (1.2)   | <11        | -0.01 | 14,264 (1.2)   | <11        | 0.00  |
| Other psychosis                                  | 15,392 (1.4)   | 13 (1.4)   | 0.01  | 7,550 (0.6)    | <11        | 0.01  | 3,042 (0.3)    | <11        | 0.00  |
| Personality disorder                             | 35,030 (3.1)   | 35 (3.9)   | 0.04  | 46,354 (3.7)   | 27 (4.4)   | 0.03  | 14,924 (1.2)   | <11        | 0.00  |
| Adjustment disorder                              | 44,521 (4.0)   | 33 (3.7)   | -0.02 | 28,839 (2.3)   | 13 (2.1)   | -0.01 | 21,851 (1.8)   | <11        | -0.01 |
| Attention deficit hyperactivity disorder         | 94,595 (8.4)   | 77 (8.5)   | 0.00  | 93,660 (7.5)   | 46 (7.4)   | 0.00  | 27,382 (2.2)   | <11        | 0.01  |
| Delirium                                         | 6,161 (0.5)    | <11        | 0.00  | 6,899 (0.6)    | <11        | -0.01 | 9,886 (0.8)    | <11        | -0.01 |
| Other psychiatric disorders                      | 77,924 (6.9)   | 66 (7.3)   | 0.01  | 66,297 (5.3)   | 35 (5.6)   | 0.01  | 49,277 (4.0)   | 17 (4.0)   | 0.00  |
| Alcohol abuse or dependence                      | 23,462 (2.1)   | 21 (2.3)   | 0.02  | 18,586 (1.5)   | <11        | 0.01  | 8,766 (0.7)    | <11        | 0.03  |
| Drug abuse or dependence                         | 68,600 (6.1)   | 59 (6.5)   | 0.02  | 51,736 (4.1)   | 26 (4.2)   | 0.00  | 45,452 (3.7)   | 16 (3.8)   | 0.01  |
| Chronic fatigue syndrome                         | 78,701 (7.0)   | 60 (6.6)   | -0.01 | 98,605 (7.9)   | 47 (7.6)   | -0.01 | 53,258 (4.3)   | 17 (4.0)   | -0.01 |
| Sleep disorder                                   | 50,521 (4.5)   | 37 (4.1)   | -0.02 | 60,405 (4.8)   | 27 (4.4)   | -0.02 | 43,515 (3.5)   | 15 (3.6)   | 0.00  |
| Epilepsy or convulsions                          | 92,193 (8.2)   | 85 (9.4)   | 0.04  | 199,203 (16.0) | 110 (17.7) | 0.05  | 533,347 (43.1) | 189 (44.9) | 0.04  |
| Pain conditions <sup>3</sup>                     | 400,735 (35.7) | 311 (34.4) | -0.03 | 445,150 (35.7) | 221 (35.6) | 0.00  | 337,997 (27.3) | 114 (27.1) | 0.00  |
| Migraine or headache                             | 177,508 (15.8) | 143 (15.8) | 0.00  | 185,997 (14.9) | 95 (15.3)  | 0.01  | 200,969 (16.2) | 70 (16.6)  | 0.01  |
| <b>Chronic maternal illness, N (%)</b>           |                |            |       |                |            |       |                |            |       |
| Hypertension                                     | 50,112 (4.5)   | 38 (4.2)   | -0.01 | 55,804 (4.5)   | 26 (4.2)   | -0.01 | 44,075 (3.6)   | 15 (3.6)   | 0.00  |
| Diabetes                                         | 31,592 (2.8)   | 24 (2.7)   | -0.01 | 33,085 (2.7)   | 15 (2.4)   | -0.01 | 20,837 (1.7)   | <11        | -0.02 |
| Renal disease                                    | 5,888 (0.5)    | <11        | 0.00  | 15,225 (1.2)   | <11        | -0.01 | 11,023 (0.9)   | <11        | 0.01  |
| Obesity or overweight                            | 33,962 (3.0)   | 28 (3.1)   | 0.00  | 52,223 (4.2)   | 25 (4.0)   | -0.01 | 32,097 (2.6)   | <11        | -0.01 |
| Smoking                                          | 125,771 (11.2) | 102 (11.3) | 0.00  | 106,238 (8.5)  | 51 (8.2)   | -0.01 | 79,771 (6.4)   | 28 (6.7)   | 0.01  |
| <b>Psychotropic and other medications, N (%)</b> |                |            |       |                |            |       |                |            |       |
| Antidepressants                                  | 735,750 (65.5) | 540 (59.7) | -0.12 | 745,456 (59.8) | 343 (55.3) | -0.09 | 490,228 (39.6) | 156 (37.1) | -0.05 |
| Antipsychotics                                   | 318,167 (28.3) | 285 (31.5) | 0.07  | 414,694 (33.2) | 215 (34.7) | 0.03  | 232,679 (18.8) | 71 (16.9)  | -0.05 |
| Benzodiazepines                                  | 301,965 (26.9) | 240 (26.6) | -0.01 | 355,822 (28.5) | 176 (28.4) | 0.00  | 300,485 (24.3) | 100 (23.8) | -0.01 |
| Other anxiolytics                                | 48,886 (4.4)   | 42 (4.6)   | 0.01  | 58,432 (4.7)   | 30 (4.8)   | 0.01  | 31,670 (2.6)   | <11        | -0.01 |
| Other hypnotics                                  | 217,574 (19.4) | 180 (19.9) | 0.01  | 233,405 (18.7) | 119 (19.2) | 0.01  | 141,822 (11.4) | 44 (10.5)  | -0.03 |
| Barbiturates                                     | 31,885 (2.8)   | 24 (2.7)   | -0.01 | 28,822 (2.3)   | 14 (2.3)   | 0.00  | 24,399 (2.0)   | <11        | 0.01  |
| Stimulants                                       | 126,366 (11.2) | 111 (12.3) | 0.03  | 131,622 (10.6) | 70 (11.3)  | 0.02  | 73,415 (5.9)   | 28 (6.7)   | 0.03  |
| Opioids                                          | 469,852 (41.8) | 365 (40.4) | -0.03 | 498,400 (40.0) | 244 (39.4) | -0.01 | 435,389 (35.1) | 143 (34.0) | -0.02 |

|                                                      |                |            |       |                |            |       |                |           |       |
|------------------------------------------------------|----------------|------------|-------|----------------|------------|-------|----------------|-----------|-------|
| Triptans                                             | 46,590 (4.1)   | 33 (3.7)   | -0.03 | 44,828 (3.6)   | 21 (3.4)   | -0.01 | 53,953 (4.4)   | 19 (4.5)  | 0.01  |
| Nonsteroidal anti-inflammatory drugs                 | 341,296 (30.4) | 261 (28.9) | -0.03 | 328,928 (26.4) | 157 (25.3) | -0.02 | 287,035 (23.2) | 92 (21.9) | -0.03 |
| Antihypertensive medications                         | 100,764 (9.0)  | 82 (9.1)   | 0.00  | 84,823 (6.8)   | 42 (6.8)   | 0.00  | 52,002 (4.2)   | 17 (4.0)  | -0.01 |
| Non-insulin antidiabetic medications                 | 25,597 (2.3)   | 19 (2.1)   | -0.01 | 39,697 (3.2)   | 17 (2.7)   | -0.03 | 15,416 (1.2)   | <11       | 0.02  |
| Insulin                                              | 12,060 (1.1)   | <11        | -0.01 | 16,925 (1.4)   | <11        | -0.01 | 8,432 (0.7)    | <11       | -0.03 |
| Corticosteroids                                      | 151,350 (13.5) | 117 (12.9) | -0.02 | 148,389 (11.9) | 72 (11.6)  | -0.01 | 108,641 (8.8)  | 37 (8.8)  | 0.00  |
| Fluconazole                                          | 55,989 (5.0)   | 43 (4.8)   | -0.01 | 53,359 (4.3)   | 25 (4.0)   | -0.01 | 40,360 (3.3)   | 13 (3.1)  | -0.01 |
| Other teratogens <sup>4</sup>                        | 35,500 (3.2)   | 27 (3.0)   | -0.01 | 43,140 (3.5)   | 21 (3.4)   | 0.00  | 22,317 (1.8)   | <11       | 0.01  |
| Methadone                                            | 4,554 (0.4)    | <11        | 0.01  | 5,020 (0.4)    | <11        | -0.01 | 4,516 (0.4)    | <11       | -0.02 |
| Buprenorphine                                        | 12,305 (1.1)   | <11        | 0.00  | 5,597 (0.5)    | <11        | 0.01  | 3,972 (0.3)    | <11       | 0.02  |
| Naltrexone                                           | 1,768 (0.2)    | <11        | 0.01  | 1,632 (0.1)    | <11        | 0.01  | 3,846 (0.3)    | <11       | 0.03  |
| Naloxone                                             | 12,148 (1.1)   | <11        | 0.00  | 6,874 (0.6)    | <11        | 0.01  | 4,048 (0.3)    | <11       | 0.02  |
| <b>Markers of burden of disease</b>                  |                |            |       |                |            |       |                |           |       |
| Obstetric Comorbidity Index <sup>5</sup> , mean (SD) | 1.5 (1.8)      | 1.5 (1.8)  | 0.00  | 1.4 (1.8)      | 1.4 (1.8)  | 0.00  | 1.1 (1.6)      | 1.2 (1.7) | 0.01  |
| Number of distinct prescriptions, mean (SD)          | 4.7 (3.6)      | 4.5 (3.7)  | -0.05 | 4.7 (3.6)      | 4.5 (3.7)  | -0.04 | 3.4 (3.4)      | 3.4 (3.6) | -0.01 |
| Number of diagnoses, mean (SD)                       | 5.9 (4.5)      | 5.6 (4.4)  | -0.06 | 5.7 (4.4)      | 5.5 (4.6)  | -0.03 | 5.0 (4.3)      | 4.9 (4.4) | -0.02 |
| Number of outpatient physician visits, mean (SD)     | 7.4 (7.5)      | 7.8 (8.7)  | 0.04  | 7.2 (7.4)      | 7.8 (9.3)  | 0.06  | 6.0 (6.6)      | 6.1 (7.9) | 0.02  |
| Patients hospitalized, N (%)                         | 67,655 (6.0)   | 57 (6.3)   | 0.01  | 62,895 (5.0)   | 31 (5.0)   | 0.00  | 79,394 (6.4)   | 27 (6.4)  | 0.00  |
| Number of hospitalizations, mean (SD)                | 0.1 (0.3)      | 0.1 (0.3)  | 0.01  | 0.1 (0.3)      | 0.1 (0.2)  | 0.00  | 0.1 (0.3)      | 0.1 (0.3) | 0.00  |
| Number of days hospitalized, mean (SD)               | 0.3 (1.7)      | 0.3 (1.7)  | 0.02  | 0.2 (1.1)      | 0.2 (0.9)  | -0.01 | 0.3 (1.6)      | 0.3 (1.4) | 0.00  |
| Number of emergency room visits, mean (SD)           | 0.8 (1.5)      | 0.9 (2.6)  | 0.05  | 0.6 (1.4)      | 0.7 (1.4)  | 0.01  | 0.5 (1.2)      | 0.5 (1.0) | -0.03 |

St. Diff.: Standardized differences, i.e., the difference in means or proportions divided by the pooled standard deviation [Austin PC. Balance diagnostics for comparing the distribution of baseline covariates between treatment groups in propensity-score matched samples. Statistics in medicine 2009;28:3083-107]

<sup>1</sup> In accordance with the data use agreement, we do not report information for frequency cells with less than 11 cases. These are noted as <11

<sup>2</sup> Other race includes Asian, Native American, Other, and Unknown

<sup>3</sup> Pain conditions include neuropathic and non-neuropathic conditions

<sup>4</sup> Other teratogens include methimazole, danazol, propylthiouracil, and progestins

<sup>5</sup> The obstetric comorbidity index predicts severe maternal morbidity. The range for the maternal comorbidity index is 0 to 45, with lower values associated with lower burden of maternal illness and higher values associated with higher burden of maternal illness [Bateman BT, Mhyre JM, Hernandez-Diaz S, Huybrechts KF, Fischer MA, Creanga AA, Callaghan WM, Gagne JJ. Development of a comorbidity index for use in obstetric patients. Obstet Gynecol. 2013;122:957-65]

**Table S10. Unadjusted baseline characteristics of exposed and unexposed pregnant women by dose tertiles of the highest lithium prescription filled during the first trimester<sup>1</sup>**

| Baseline characteristics                              | Non-exposed<br>(N=1,322,955) | Lithium<br>≤600<br>mg/day<br>(N=280) | St.<br>Diff. | Non-exposed<br>(N=1,322,955) | Lithium<br>601-900<br>mg/day<br>(N=242) | St.<br>Diff. | Non-exposed<br>(N=1,322,955) | Lithium<br>>900<br>mg/day<br>(N=141) | St.<br>Diff. |
|-------------------------------------------------------|------------------------------|--------------------------------------|--------------|------------------------------|-----------------------------------------|--------------|------------------------------|--------------------------------------|--------------|
| Age, mean (SD)                                        | 24.0 (5.8)                   | 25.0 (5.8)                           | 0.18         | 24.0 (5.8)                   | 25.9 (6.3)                              | 0.31         | 24.0 (5.8)                   | 26.4 (6.4)                           | 0.40         |
| Race                                                  |                              |                                      |              |                              |                                         |              |                              |                                      |              |
| White                                                 | 526,603 (39.8)               | 220 (78.6)                           | 0.86         | 526,603 (39.8)               | 171 (70.7)                              | 0.65         | 526,603 (39.8)               | 99 (70.2)                            | 0.64         |
| Black                                                 | 445,675 (33.7)               | 34 (12.1)                            | -0.53        | 445,675 (33.7)               | 38 (15.7)                               | -0.43        | 445,675 (33.7)               | 17 (12.1)                            | -0.53        |
| Hispanic                                              | 195,174 (14.8)               | <11                                  | -0.41        | 195,174 (14.8)               | 15 (6.2)                                | -0.28        | 195,174 (14.8)               | 12 (8.5)                             | -0.20        |
| Other <sup>2</sup>                                    | 155,503 (11.8)               | 17 (6.1)                             | -0.20        | 155,503 (11.8)               | 18 (7.4)                                | -0.15        | 155,503 (11.8)               | 13 (9.2)                             | -0.08        |
| Year                                                  |                              |                                      |              |                              |                                         |              |                              |                                      |              |
| 2000                                                  | 1,569 (0.1)                  | <11                                  | -0.05        | 1,569 (0.1)                  | <11                                     | 0.06         | 1,569 (0.1)                  | <11                                  | -0.05        |
| 2001                                                  | 81,024 (6.1)                 | 14 (5.0)                             | -0.05        | 81,024 (6.1)                 | 12 (5.0)                                | -0.05        | 81,024 (6.1)                 | <11                                  | -0.02        |
| 2002                                                  | 92,771 (7.0)                 | 19 (6.8)                             | -0.01        | 92,771 (7.0)                 | 11 (4.6)                                | -0.11        | 92,771 (7.0)                 | 11 (7.8)                             | 0.03         |
| 2003                                                  | 126,822 (9.6)                | 26 (9.3)                             | -0.01        | 126,822 (9.6)                | 23 (9.5)                                | 0.00         | 126,822 (9.6)                | 18 (12.8)                            | 0.10         |
| 2004                                                  | 153,523 (11.6)               | 36 (12.9)                            | 0.04         | 153,523 (11.6)               | 30 (12.4)                               | 0.02         | 153,523 (11.6)               | 17 (12.1)                            | 0.01         |
| 2005                                                  | 154,733 (11.7)               | 32 (11.4)                            | -0.01        | 154,733 (11.7)               | 29 (12.0)                               | 0.01         | 154,733 (11.7)               | <11                                  | -0.21        |
| 2006                                                  | 154,415 (11.7)               | 30 (10.7)                            | -0.03        | 154,415 (11.7)               | 23 (9.5)                                | -0.07        | 154,415 (11.7)               | 19 (13.5)                            | 0.05         |
| 2007                                                  | 146,133 (11.0)               | 30 (10.7)                            | -0.01        | 146,133 (11.0)               | 26 (10.7)                               | -0.01        | 146,133 (11.0)               | 17 (12.1)                            | 0.03         |
| 2008                                                  | 143,246 (10.8)               | 28 (10.0)                            | -0.03        | 143,246 (10.8)               | 35 (14.5)                               | 0.11         | 143,246 (10.8)               | 14 (9.9)                             | -0.03        |
| 2009                                                  | 149,472 (11.3)               | 41 (14.6)                            | 0.10         | 149,472 (11.3)               | 29 (12.0)                               | 0.02         | 149,472 (11.3)               | 16 (11.4)                            | 0.00         |
| 2010                                                  | 119,247 (9.0)                | 24 (8.6)                             | -0.02        | 119,247 (9.0)                | 23 (9.5)                                | 0.02         | 119,247 (9.0)                | 13 (9.2)                             | 0.01         |
| Multiple gestation                                    | 44,792 (3.4)                 | <11                                  | -0.08        | 44,792 (3.4)                 | <11                                     | -0.11        | 44,792 (3.4)                 | <11                                  | 0.08         |
| <b>Psychiatric and neurological conditions, N (%)</b> |                              |                                      |              |                              |                                         |              |                              |                                      |              |
| Bipolar disorder                                      | 9,485 (0.7)                  | 169 (60.4)                           | 1.70         | 9,485 (0.7)                  | 164 (67.8)                              | 1.99         | 9,485 (0.7)                  | 103 (73.1)                           | 2.26         |
| Depression                                            | 63,110 (4.8)                 | 78 (27.9)                            | 0.66         | 63,110 (4.8)                 | 58 (24.0)                               | 0.57         | 63,110 (4.8)                 | 31 (22.0)                            | 0.52         |
| Anxiety                                               | 41,759 (3.2)                 | 51 (18.2)                            | 0.50         | 41,759 (3.2)                 | 47 (19.4)                               | 0.53         | 41,759 (3.2)                 | 19 (13.5)                            | 0.38         |

|                                                  |                |            |       |                |            |       |                |           |       |
|--------------------------------------------------|----------------|------------|-------|----------------|------------|-------|----------------|-----------|-------|
| Schizophrenia                                    | 1,639 (0.1)    | <11        | 0.24  | 1,639 (0.1)    | 15 (6.2)   | 0.35  | 1,639 (0.1)    | <11       | 0.36  |
| Other psychosis                                  | 2,138 (0.2)    | <11        | 0.22  | 2,138 (0.2)    | <11        | 0.24  | 2,138 (0.2)    | <11       | 0.35  |
| Personality disorder                             | 2,160 (0.2)    | 16 (5.7)   | 0.33  | 2,160 (0.2)    | <11        | 0.24  | 2,160 (0.2)    | 12 (8.5)  | 0.42  |
| Adjustment disorder                              | 13,135 (1.0)   | 12 (4.3)   | 0.21  | 13,135 (1.0)   | <11        | 0.14  | 13,135 (1.0)   | <11       | 0.04  |
| Attention deficit hyperactivity disorder         | 10,118 (0.8)   | 24 (8.6)   | 0.38  | 10,118 (0.8)   | 19 (7.9)   | 0.35  | 10,118 (0.8)   | <11       | 0.19  |
| Delirium                                         | 698 (0.1)      | <11        | -0.03 | 698 (0.1)      | <11        | 0.07  | 698 (0.1)      | <11       | 0.20  |
| Other psychiatric disorders                      | 15,150 (1.1)   | 21 (7.5)   | 0.32  | 15,150 (1.1)   | 21 (8.7)   | 0.35  | 15,150 (1.1)   | <11       | 0.28  |
| Alcohol abuse or dependence                      | 6,754 (0.5)    | <11        | 0.22  | 6,754 (0.5)    | 15 (6.2)   | 0.32  | 6,754 (0.5)    | <11       | 0.27  |
| Drug abuse or dependence                         | 16,378 (1.2)   | 23 (8.2)   | 0.33  | 16,378 (1.2)   | 33 (13.6)  | 0.49  | 16,378 (1.2)   | 20 (14.2) | 0.50  |
| Chronic fatigue syndrome                         | 36,215 (2.7)   | 18 (6.4)   | 0.18  | 36,215 (2.7)   | 12 (5.0)   | 0.12  | 36,215 (2.7)   | <11       | 0.15  |
| Sleep disorder                                   | 7,945 (0.6)    | 11 (3.9)   | 0.22  | 7,945 (0.6)    | <11        | 0.23  | 7,945 (0.6)    | <11       | 0.17  |
| Epilepsy or convulsions                          | 3,894 (0.3)    | <11        | 0.15  | 3,894 (0.3)    | <11        | 0.16  | 3,894 (0.3)    | <11       | 0.17  |
| Pain conditions <sup>3</sup>                     | 183,219 (13.8) | 80 (28.6)  | 0.37  | 183,219 (13.8) | 62 (25.6)  | 0.30  | 183,219 (13.8) | 42 (29.8) | 0.39  |
| Migraine or headache                             | 88,074 (6.7)   | 37 (13.2)  | 0.22  | 88,074 (6.7)   | 37 (15.3)  | 0.28  | 88,074 (6.7)   | 25 (17.7) | 0.34  |
| <b>Chronic maternal illness, N (%)</b>           |                |            |       |                |            |       |                |           |       |
| Hypertension                                     | 24,529 (1.9)   | <11        | 0.04  | 24,529 (1.9)   | <11        | 0.04  | 24,529 (1.9)   | <11       | 0.23  |
| Diabetes                                         | 23,287 (1.8)   | <11        | 0.11  | 23,287 (1.8)   | <11        | -0.19 | 23,287 (1.8)   | <11       | 0.21  |
| Renal disease                                    | 3,795 (0.3)    | <11        | 0.01  | 3,795 (0.3)    | <11        | 0.14  | 3,795 (0.3)    | <11       | -0.08 |
| Obesity or overweight                            | 22,123 (1.7)   | <11        | 0.08  | 22,123 (1.7)   | <11        | 0.06  | 22,123 (1.7)   | <11       | 0.12  |
| Smoking                                          | 38,975 (2.9)   | 20 (7.1)   | 0.19  | 38,975 (2.9)   | 22 (9.1)   | 0.26  | 38,975 (2.9)   | <11       | 0.16  |
| <b>Psychotropic and other medications, N (%)</b> |                |            |       |                |            |       |                |           |       |
| Antidepressants                                  | 106,412 (8.0)  | 172 (61.4) | 1.35  | 106,412 (8.0)  | 170 (70.3) | 1.65  | 106,412 (8.0)  | 89 (63.1) | 1.40  |
| Antipsychotics                                   | 12,366 (0.9)   | 113 (40.4) | 1.11  | 12,366 (0.9)   | 112 (46.3) | 1.26  | 12,366 (0.9)   | 83 (58.9) | 1.63  |
| Benzodiazepines                                  | 34,932 (2.6)   | 82 (29.3)  | 0.78  | 34,932 (2.6)   | 77 (31.8)  | 0.84  | 34,932 (2.6)   | 48 (34.0) | 0.88  |
| Other anxiolytics                                | 4,288 (0.3)    | 13 (4.6)   | 0.28  | 4,288 (0.3)    | 13 (5.4)   | 0.31  | 4,288 (0.3)    | <11       | 0.23  |
| Other hypnotics                                  | 43,150 (3.3)   | 49 (17.5)  | 0.48  | 43,150 (3.3)   | 43 (17.8)  | 0.49  | 43,150 (3.3)   | 22 (15.6) | 0.43  |
| Barbiturates                                     | 12,269 (0.9)   | 11 (3.9)   | 0.20  | 12,269 (0.9)   | <11        | 0.09  | 12,269 (0.9)   | <11       | 0.21  |
| Stimulants                                       | 7,842 (0.6)    | 24 (8.6)   | 0.39  | 7,842 (0.6)    | 16 (6.6)   | 0.33  | 7,842 (0.6)    | 14 (9.9)  | 0.43  |
| Opioids                                          | 249,821 (18.9) | 107 (38.2) | 0.44  | 249,821 (18.9) | 82 (33.9)  | 0.34  | 249,821 (18.9) | 64 (45.4) | 0.59  |
| Triptans                                         | 12,174 (0.9)   | 12 (4.3)   | 0.21  | 12,174 (0.9)   | <11        | 0.09  | 12,174 (0.9)   | <11       | 0.10  |

|                                                      |                |           |       |                |            |       |                |             |       |
|------------------------------------------------------|----------------|-----------|-------|----------------|------------|-------|----------------|-------------|-------|
| Nonsteroidal anti-inflammatory drugs                 | 211,001 (15.9) | 76 (27.1) | 0.27  | 211,001 (15.9) | 62 (25.6)  | 0.24  | 211,001 (15.9) | 28 (19.9)   | 0.10  |
| Antihypertensive medications                         | 27,316 (2.1)   | 18 (6.4)  | 0.22  | 27,316 (2.1)   | 17 (7.0)   | 0.24  | 27,316 (2.1)   | 13 (9.2)    | 0.31  |
| Non-insulin antidiabetic medications                 | 8,681 (0.7)    | <11       | 0.08  | 8,681 (0.7)    | <11        | -0.03 | 8,681 (0.7)    | <11         | 0.20  |
| Insulin                                              | 9,554 (0.7)    | <11       | 0.04  | 9,554 (0.7)    | <11        | -0.12 | 9,554 (0.7)    | <11         | 0.16  |
| Corticosteroids                                      | 75,693 (5.7)   | 29 (10.4) | 0.17  | 75,693 (5.7)   | 25 (10.3)  | 0.17  | 75,693 (5.7)   | 19 (13.5)   | 0.26  |
| Fluconazole                                          | 22,091 (1.7)   | 15 (5.4)  | 0.20  | 22,091 (1.7)   | <11        | 0.11  | 22,091 (1.7)   | <11         | 0.03  |
| Other teratogens <sup>4</sup>                        | 16,321 (1.2)   | <11       | 0.05  | 16,321 (1.2)   | <11        | 0.04  | 16,321 (1.2)   | <11         | 0.02  |
| Methadone                                            | 595 (0.0)      | <11       | 0.07  | 595 (0.0)      | <11        | 0.08  | 595 (0.0)      | <11         | -0.03 |
| Buprenorphine                                        | 1,068 (0.1)    | <11       | 0.18  | 1,068 (0.1)    | <11        | 0.07  | 1,068 (0.1)    | <11         | -0.04 |
| Naltrexone                                           | 65 (0.0)       | <11       | -0.01 | 65 (0.0)       | <11        | 0.09  | 65 (0.0)       | <11         | -0.01 |
| Naloxone                                             | 1,215 (0.1)    | <11       | 0.21  | 1,215 (0.1)    | <11        | 0.06  | 1,215 (0.1)    | <11         | -0.04 |
| <b>Markers of burden of disease</b>                  |                |           |       |                |            |       |                |             |       |
| Obstetric Comorbidity Index <sup>5</sup> , mean (SD) | 0.9 (1.4)      | 1.3 (1.6) | 0.30  | 0.9 (1.4)      | 1.7 (1.9)  | 0.46  | 0.9 (1.4)      | 2.0 (1.9)   | 0.66  |
| Number of distinct prescriptions, mean (SD)          | 1.6 (2.3)      | 4.5 (4.0) | 0.89  | 1.6 (2.3)      | 4.4 (3.7)  | 0.90  | 1.6 (2.3)      | 4.6 (3.2)   | 1.06  |
| Number of diagnoses, mean (SD)                       | 2.5 (3.1)      | 5.6 (4.7) | 0.76  | 2.5 (3.1)      | 5.2 (4.6)  | 0.69  | 2.5 (3.1)      | 5.2 (4.1)   | 0.73  |
| Number of outpatient physician visits, mean (SD)     | 2.8 (4.0)      | 7.6 (7.5) | 0.81  | 2.8 (4.0)      | 8.3 (10.7) | 0.68  | 2.8 (4.0)      | 10.4 (11.9) | 0.86  |
| Patients hospitalized, N (%)                         | 48,294 (3.7)   | 25 (8.9)  | 0.22  | 48,294 (3.7)   | 21 (8.7)   | 0.21  | 48,294 (3.7)   | 14 (9.9)    | 0.25  |
| Number of hospitalizations, mean (SD)                | 0.0 (0.2)      | 0.1 (0.6) | 0.21  | 0.0 (0.2)      | 0.1 (0.4)  | 0.20  | 0.0 (0.2)      | 0.1 (0.4)   | 0.24  |
| Number of days hospitalized, mean (SD)               | 0.1 (0.9)      | 0.7 (3.7) | 0.20  | 0.1 (0.9)      | 0.5 (2.0)  | 0.24  | 0.1 (0.9)      | 0.8 (3.0)   | 0.28  |
| Number of emergency room visits, mean (SD)           | 0.3 (0.8)      | 1.0 (4.2) | 0.22  | 0.3 (0.8)      | 0.7 (1.4)  | 0.32  | 0.3 (0.8)      | 0.7 (1.3)   | 0.34  |

St. Diff.: Standardized differences, i.e., the difference in means or proportions divided by the pooled standard deviation [Austin PC. Balance diagnostics for comparing the distribution of baseline covariates between treatment groups in propensity-score matched samples. *Statistics in medicine* 2009;28:3083-107]

<sup>1</sup>In accordance with the data use agreement, we do not report information for frequency cells with less than 11 cases. These are noted as <11

<sup>2</sup>Other race includes Asian, Native American, Other, and Unknown

<sup>3</sup>Pain conditions include neuropathic and non-neuropathic conditions

<sup>4</sup>Other teratogens include methimazole, danazol, propylthiouracil, and progestins

<sup>5</sup>The obstetric comorbidity index predicts severe maternal morbidity. The range for the maternal comorbidity index is 0 to 45, with lower values associated with lower burden of maternal illness and higher values associated with higher burden of maternal illness [Bateman BT, Mhyre JM, Hernandez-Diaz S, Huybrechts KF, Fischer MA, Creanga AA, Callaghan WM, Gagne JJ. Development of a comorbidity index for use in obstetric patients. *Obstet Gynecol.* 2013;122:957-65]



**Table S11. Propensity-score-adjusted baseline characteristics of exposed and unexposed pregnant women by dose tertiles of the highest lithium prescription filled during the first trimester<sup>1</sup>**

| Baseline characteristics                              | Non-exposed<br>(N=860,385) | Lithium<br>≤600<br>mg/day<br>(N=280) | St.<br>Diff. | Non-exposed<br>(N=907,181) | Lithium<br>601-900<br>mg/day<br>(N=242) | St.<br>Diff. | Non-exposed<br>(N=616,329) | Lithium<br>>900<br>mg/day<br>(N=140) | St.<br>Diff. |
|-------------------------------------------------------|----------------------------|--------------------------------------|--------------|----------------------------|-----------------------------------------|--------------|----------------------------|--------------------------------------|--------------|
| Age, mean (SD)                                        | 25.0 (6.0)                 | 25.0 (5.8)                           | 0.01         | 25.9 (6.3)                 | 25.9 (6.3)                              | 0.00         | 26.3 (6.5)                 | 26.3 (6.4)                           | 0.01         |
| Race                                                  |                            |                                      |              |                            |                                         |              |                            |                                      |              |
| White                                                 | 700,745 (81.4)             | 220 (78.6)                           | -0.07        | 659,837 (72.7)             | 171 (70.7)                              | -0.05        | 440,150 (71.4)             | 98 (70.0)                            | -0.03        |
| Black                                                 | 87,838 (10.2)              | 34 (12.1)                            | 0.06         | 132,388 (14.6)             | 38 (15.7)                               | 0.03         | 72,583 (11.8)              | 17 (12.1)                            | 0.01         |
| Hispanic                                              | 20,940 (2.4)               | <11                                  | 0.05         | 49,466 (5.5)               | 15 (6.2)                                | 0.03         | 46,724 (7.6)               | 12 (8.6)                             | 0.04         |
| Other <sup>2</sup>                                    | 50,862 (5.9)               | 17 (6.1)                             | 0.01         | 65,490 (7.2)               | 18 (7.4)                                | 0.01         | 56,873 (9.2)               | 13 (9.3)                             | 0.00         |
| Year                                                  |                            |                                      |              |                            |                                         |              |                            |                                      |              |
| 2000                                                  | <11                        | <11                                  | 0.00         | 6,639 (0.7)                | <11                                     | -0.04        | <11                        | <11                                  | 0.00         |
| 2001                                                  | 46,700 (5.4)               | 14 (5.0)                             | -0.02        | 49,123 (5.4)               | 12 (5.0)                                | -0.02        | 37,608 (6.1)               | <11                                  | -0.02        |
| 2002                                                  | 53,372 (6.2)               | 19 (6.8)                             | 0.02         | 37,679 (4.2)               | 11 (4.5)                                | 0.02         | 39,120 (6.3)               | 11 (7.9)                             | 0.06         |
| 2003                                                  | 82,155 (9.6)               | 26 (9.3)                             | -0.01        | 87,347 (9.6)               | 23 (9.5)                                | 0.00         | 76,231 (12.4)              | 18 (12.9)                            | 0.01         |
| 2004                                                  | 109,209 (12.7)             | 36 (12.9)                            | 0.00         | 108,841 (12.0)             | 30 (12.4)                               | 0.01         | 68,935 (11.2)              | 17 (12.1)                            | 0.03         |
| 2005                                                  | 97,545 (11.3)              | 32 (11.4)                            | 0.00         | 105,992 (11.7)             | 29 (12.0)                               | 0.01         | 37,028 (6.0)               | <11                                  | -0.01        |
| 2006                                                  | 93,682 (10.9)              | 30 (10.7)                            | -0.01        | 84,442 (9.3)               | 23 (9.5)                                | 0.01         | 84,145 (13.7)              | 19 (13.6)                            | 0.00         |
| 2007                                                  | 90,263 (10.5)              | 30 (10.7)                            | 0.01         | 97,119 (10.7)              | 26 (10.7)                               | 0.00         | 79,528 (12.9)              | 16 (11.4)                            | -0.05        |
| 2008                                                  | 87,581 (10.2)              | 28 (10.0)                            | -0.01        | 127,053 (14.0)             | 35 (14.5)                               | 0.01         | 61,750 (10.0)              | 14 (10.0)                            | 0.00         |
| 2009                                                  | 125,152 (14.5)             | 41 (14.6)                            | 0.00         | 113,938 (12.6)             | 29 (12.0)                               | -0.02        | 71,046 (11.5)              | 16 (11.4)                            | 0.00         |
| 2010                                                  | 74,727 (8.7)               | 24 (8.6)                             | 0.00         | 89,009 (9.8)               | 23 (9.5)                                | -0.01        | 60,937 (9.9)               | 13 (9.3)                             | -0.02        |
| Multiple gestation                                    | 19,999 (2.3)               | <11                                  | -0.01        | 16,341 (1.8)               | <11                                     | -0.01        | 29,173 (4.7)               | <11                                  | 0.01         |
| <b>Psychiatric and neurological conditions, N (%)</b> |                            |                                      |              |                            |                                         |              |                            |                                      |              |
| Bipolar disorder                                      | 512,967 (59.6)             | 169 (60.4)                           | 0.02         | 612,227 (67.5)             | 164 (67.8)                              | 0.01         | 467,050 (75.8)             | 102 (72.9)                           | -0.07        |
| Depression                                            | 255,626 (29.7)             | 78 (27.9)                            | -0.04        | 235,624 (26.0)             | 58 (24.0)                               | -0.05        | 148,815 (24.1)             | 31 (22.1)                            | -0.05        |
| Anxiety                                               | 165,970 (19.3)             | 51 (18.2)                            | -0.03        | 182,582 (20.1)             | 47 (19.4)                               | -0.02        | 101,627 (16.5)             | 19 (13.6)                            | -0.08        |
| Schizophrenia                                         | 23,591 (2.7)               | <11                                  | 0.03         | 45,181 (5.0)               | 15 (6.2)                                | 0.05         | 36,134 (5.9)               | <11                                  | 0.02         |

|                                                  |                |            |       |                |            |       |                |           |       |
|--------------------------------------------------|----------------|------------|-------|----------------|------------|-------|----------------|-----------|-------|
| Other psychosis                                  | 20,984 (2.4)   | <11        | 0.03  | 29,143 (3.2)   | <11        | 0.01  | 35,671 (5.8)   | <11       | 0.03  |
| Personality disorder                             | 39,973 (4.7)   | 16 (5.7)   | 0.05  | 29,687 (3.3)   | <11        | 0.00  | 44,059 (7.1)   | 11 (7.9)  | 0.03  |
| Adjustment disorder                              | 40,803 (4.7)   | 12 (4.3)   | -0.02 | 30,966 (3.4)   | <11        | -0.03 | 10,266 (1.7)   | <11       | -0.02 |
| Attention deficit hyperactivity disorder         | 72,294 (8.4)   | 24 (8.6)   | 0.01  | 73,076 (8.1)   | 19 (7.9)   | -0.01 | 26,400 (4.3)   | <11       | -0.04 |
| Delirium                                         | <11            | <11        | 0.00  | 4,212 (0.5)    | <11        | -0.01 | 9,527 (1.5)    | <11       | 0.04  |
| Other psychiatric disorders                      | 60,955 (7.1)   | 21 (7.5)   | 0.02  | 78,781 (8.7)   | 21 (8.7)   | 0.00  | 34,767 (5.6)   | <11       | 0.03  |
| Alcohol abuse or dependence                      | 31,171 (3.6)   | <11        | 0.00  | 47,886 (5.3)   | 15 (6.2)   | 0.04  | 29,110 (4.7)   | <11       | 0.01  |
| Drug abuse or dependence                         | 67,652 (7.9)   | 23 (8.2)   | 0.01  | 115,760 (12.8) | 33 (13.6)  | 0.03  | 83,152 (13.5)  | 19 (13.6) | 0.00  |
| Chronic fatigue syndrome                         | 58,278 (6.8)   | 18 (6.4)   | -0.01 | 46,364 (5.1)   | 12 (5.0)   | -0.01 | 37,363 (6.1)   | <11       | -0.01 |
| Sleep disorder                                   | 35,790 (4.2)   | 11 (3.9)   | -0.01 | 39,633 (4.4)   | <11        | -0.01 | 19,585 (3.2)   | <11       | -0.02 |
| Epilepsy or convulsions                          | 13,739 (1.6)   | <11        | 0.01  | 17,275 (1.9)   | <11        | 0.01  | 12,276 (2.0)   | <11       | 0.01  |
| Pain conditions <sup>3</sup>                     | 254,102 (29.5) | 80 (28.6)  | -0.02 | 250,687 (27.6) | 62 (25.6)  | -0.05 | 190,363 (30.9) | 42 (30.0) | -0.02 |
| Migraine or headache                             | 114,372 (13.3) | 37 (13.2)  | 0.00  | 146,144 (16.1) | 37 (15.3)  | -0.02 | 110,165 (17.9) | 25 (17.9) | 0.00  |
| <b>Chronic maternal illness, N (%)</b>           |                |            |       |                |            |       |                |           |       |
| Hypertension                                     | 20,873 (2.4)   | <11        | 0.00  | 23,240 (2.6)   | <11        | -0.01 | 42,323 (6.9)   | <11       | -0.02 |
| Diabetes                                         | 34,127 (4.0)   | <11        | -0.02 | 58 (0.0)       | <11        | -0.01 | 36,764 (6.0)   | <11       | -0.01 |
| Renal disease                                    | 2,677 (0.3)    | <11        | 0.01  | 13,741 (1.5)   | <11        | 0.01  | 30 (0.0)       | <11       | -0.01 |
| Obesity or overweight                            | 26,410 (3.1)   | <11        | -0.01 | 24,625 (2.7)   | <11        | -0.01 | 20,395 (3.3)   | <11       | 0.01  |
| Smoking                                          | 65,643 (7.6)   | 20 (7.1)   | -0.02 | 85,593 (9.4)   | 22 (9.1)   | -0.01 | 44,231 (7.2)   | <11       | -0.03 |
| <b>Psychotropic and other medications, N (%)</b> |                |            |       |                |            |       |                |           |       |
| Antidepressants                                  | 564,152 (65.6) | 172 (61.4) | -0.09 | 661,054 (72.9) | 170 (70.2) | -0.06 | 392,382 (63.7) | 88 (62.9) | -0.02 |
| Antipsychotics                                   | 308,623 (35.9) | 113 (40.4) | 0.09  | 383,427 (42.3) | 112 (46.3) | 0.08  | 343,806 (55.8) | 82 (58.6) | 0.06  |
| Benzodiazepines                                  | 240,622 (28.0) | 82 (29.3)  | 0.03  | 287,415 (31.7) | 77 (31.8)  | 0.00  | 200,264 (32.5) | 47 (33.6) | 0.02  |
| Other anxiolytics                                | 36,444 (4.2)   | 13 (4.6)   | 0.02  | 45,958 (5.1)   | 13 (5.4)   | 0.01  | 21,966 (3.6)   | 5 (3.6)   | 0.00  |
| Other hypnotics                                  | 143,527 (16.7) | 49 (17.5)  | 0.02  | 157,416 (17.4) | 43 (17.8)  | 0.01  | 96,264 (15.6)  | 21 (15.0) | -0.02 |
| Barbiturates                                     | 30,628 (3.6)   | 11 (3.9)   | 0.02  | 19,715 (2.2)   | <11        | -0.01 | 23,359 (3.8)   | <11       | 0.03  |
| Stimulants                                       | 70,300 (8.2)   | 24 (8.6)   | 0.01  | 62,525 (6.9)   | 16 (6.6)   | -0.01 | 57,552 (9.3)   | 14 (10.0) | 0.02  |
| Opioids                                          | 339,580 (39.5) | 107 (38.2) | -0.03 | 318,335 (35.1) | 82 (33.9)  | -0.03 | 283,665 (46.0) | 64 (45.7) | -0.01 |
| Triptans                                         | 38,367 (4.5)   | 12 (4.3)   | -0.01 | 22,895 (2.5)   | <11        | -0.03 | 15,683 (2.5)   | <11       | -0.03 |
| Nonsteroidal anti-inflammatory drugs             | 240,623 (28.0) | 76 (27.1)  | -0.02 | 242,242 (26.7) | 62 (25.6)  | -0.02 | 131,951 (21.4) | 28 (20.0) | -0.03 |

|                                                      |               |           |       |               |            |       |               |             |                   |
|------------------------------------------------------|---------------|-----------|-------|---------------|------------|-------|---------------|-------------|-------------------|
| Antihypertensive medications                         | 51,003 (5.9)  | 18 (6.4)  | 0.02  | 65,742 (7.2)  | 17 (7.0)   | -0.01 | 56,378 (9.2)  | 13 (9.3)    | 0.00              |
| Non-insulin antidiabetic medications                 | 12,573 (1.5)  | <11       | 0.00  | 3,963 (0.4)   | <11        | 0.00  | 20,090 (3.3)  | <11         | 0.02              |
| Insulin                                              | 10,755 (1.3)  | <11       | -0.02 | 38 (0.0)      | <11        | -0.01 | 18,023 (2.9)  | <11         | 0.00              |
| Corticosteroids                                      | 92,603 (10.8) | 29 (10.4) | -0.01 | 98,663 (10.9) | 25 (10.3)  | -0.02 | 79,673 (12.9) | 19 (13.6)   | 0.02              |
| Fluconazole                                          | 48,609 (5.6)  | 15 (5.4)  | -0.01 | 30,198 (3.3)  | <11        | 0.00  | 13,635 (2.2)  | <11         | 0.00              |
| Other teratogens <sup>4</sup>                        | 15,264 (1.8)  | <11       | 0.00  | 15,031 (1.7)  | <11        | 0.00  | 10,721 (1.7)  | <11         | -0.02             |
| Methadone                                            | 3,272 (0.4)   | <11       | 0.00  | 2,992 (0.3)   | <11        | 0.01  | <11           | <11         | 0.00              |
| Buprenorphine                                        | 10,818 (1.3)  | <11       | 0.04  | 3,964 (0.4)   | <11        | 0.00  | 26 (0.0)      | <11         | -0.01             |
| Naltrexone                                           | <11           | <11       | 0.00  | 3,181 (0.4)   | <11        | 0.01  | <11           | <11         | 0.00              |
| Naloxone                                             | 14,476 (1.7)  | <11       | 0.06  | 3,851 (0.4)   | <11        | 0.00  | 29 (0.0)      | <11         | -0.01             |
| <b>Markers of burden of disease</b>                  |               |           |       |               |            |       |               |             |                   |
| Obstetric Comorbidity Index <sup>5</sup> , mean (SD) | 1.3 (1.6)     | 1.3 (1.6) | 0.00  | 1.6 (1.7)     | 1.7 (1.9)  | 0.04  | 2.0 (1.9)     | 2.0 (1.9)   | 0.00              |
| Number of distinct prescriptions, mean (SD)          | 4.5 (3.6)     | 4.5 (4.0) | 0.00  | 4.5 (3.6)     | 4.4 (3.7)  | -0.04 | 4.8 (3.6)     | 4.6 (3.2)   | -0.08             |
| Number of diagnoses, mean (SD)                       | 5.7 (4.5)     | 5.6 (4.7) | -0.03 | 5.4 (4.6)     | 5.2 (4.5)  | -0.05 | 5.6 (4.5)     | 5.2 (4.1)   | -0.09             |
| Number of outpatient physician visits, mean (SD)     | 7.6 (7.6)     | 7.6 (7.5) | 0.01  | 7.8 (8.8)     | 8.3 (10.7) | 0.05  | 8.8 (8.8)     | 10.1 (11.4) | 0.13 <sup>6</sup> |
| Patients hospitalized, N (%)                         | 73,059 (8.5)  | 25 (8.9)  | 0.02  | 76,374 (8.4)  | 21 (8.7)   | 0.01  | 59,934 (9.7)  | 14 (10.0)   | 0.01              |
| Number of hospitalizations, mean (SD)                | 0.1 (0.4)     | 0.1 (0.6) | 0.05  | 0.1 (0.4)     | 0.1 (0.4)  | 0.01  | 0.1 (0.4)     | 0.1 (0.4)   | 0.03              |
| Number of days hospitalized, mean (SD)               | 0.4 (2.0)     | 0.7 (3.7) | 0.08  | 0.5 (2.2)     | 0.5 (2.0)  | 0.02  | 0.5 (2.0)     | 0.8 (3.0)   | 0.11 <sup>7</sup> |
| Number of emergency room visits, mean (SD)           | 0.8 (1.5)     | 1.0 (4.2) | 0.07  | 0.7 (1.6)     | 0.7 (1.4)  | -0.02 | 0.7 (1.8)     | 0.7 (1.3)   | -0.04             |

St. Diff.: Standardized differences, i.e., the difference in means or proportions divided by the pooled standard deviation [Austin PC. Balance diagnostics for comparing the distribution of baseline covariates between treatment groups in propensity-score matched samples. *Statistics in medicine* 2009;28:3083-107]

<sup>1</sup> In accordance with the data use agreement, we do not report information for frequency cells with less than 11 cases. These are noted as <11

<sup>2</sup> Other race includes Asian, Native American, Other, and Unknown

<sup>3</sup> Pain conditions include neuropathic and non-neuropathic conditions

<sup>4</sup> Other teratogens include methimazole, danazol, propylthiouracil, and progestins

<sup>5</sup> The obstetric comorbidity index predicts severe maternal morbidity. The range for the maternal comorbidity index is 0 to 45, with lower values associated with lower burden of maternal illness and higher values associated with higher burden of maternal illness [Bateman BT, Mhyre JM, Hernandez-Diaz S, Huybrechts KF, Fischer MA, Creanga AA, Callaghan WM, Gagne JJ. Development of a comorbidity index for use in obstetric patients. *Obstet Gynecol.* 2013;122:957-65]

<sup>6</sup> The covariate “number of outpatient physician visits” was included in the propensity score model as a categorical covariate (quartiles). Quartiles of number of physician visits were balanced with standardized differences <0.1

<sup>7</sup> The covariate “number of days hospitalized” was included in the propensity score model as a categorical covariate (quartiles). Quartiles of number of physician visits were balanced with standardized differences <0.1

**Table S12. Unadjusted baseline characteristics of exposed and unexposed pregnant women by dose tertiles of the highest lamotrigine prescription filled during the first trimester<sup>1</sup>**

| Baseline characteristics                              | Lamotrigine                  |                            |              | Lamotrigine                  |                              |              | Lamotrigine                  |                           |              |
|-------------------------------------------------------|------------------------------|----------------------------|--------------|------------------------------|------------------------------|--------------|------------------------------|---------------------------|--------------|
|                                                       | Non-exposed<br>(N=1,322,955) | <=100<br>mg/day<br>(N=795) | St.<br>Diff. | Non-exposed<br>(N=1,322,955) | 101-200<br>mg/day<br>(N=673) | St.<br>Diff. | Non-exposed<br>(N=1,322,955) | >200<br>mg/day<br>(N=477) | St.<br>Diff. |
| Age, mean (SD)                                        | 24.0 (5.8)                   | 24.8 (5.7)                 | 0.15         | 24.0 (5.8)                   | 25.4 (5.9)                   | 0.25         | 24.0 (5.8)                   | 25.4 (5.7)                | 0.24         |
| Race                                                  |                              |                            |              |                              |                              |              |                              |                           |              |
| White                                                 | 526,603 (39.8)               | 580 (73.0)                 | 0.71         | 526,603 (39.8)               | 534 (79.4)                   | 0.88         | 526,603 (39.8)               | 332 (69.6)                | 0.63         |
| Black                                                 | 445,675 (33.7)               | 107 (13.5)                 | -0.49        | 445,675 (33.7)               | 73 (10.8)                    | -0.57        | 445,675 (33.7)               | 63 (13.2)                 | -0.50        |
| Hispanic                                              | 195,174 (14.8)               | 41 (5.2)                   | -0.32        | 195,174 (14.8)               | 29 (4.3)                     | -0.36        | 195,174 (14.8)               | 37 (7.8)                  | -0.22        |
| Other <sup>2</sup>                                    | 155,503 (11.8)               | 67 (8.4)                   | -0.11        | 155,503 (11.8)               | 37 (5.5)                     | -0.22        | 155,503 (11.8)               | 45 (9.4)                  | -0.08        |
| Year                                                  |                              |                            |              |                              |                              |              |                              |                           |              |
| 2000                                                  | 1,569 (0.1)                  | <11                        | -0.05        | 1,569 (0.1)                  | <11                          | -0.05        | 1,569 (0.1)                  | <11                       | -0.05        |
| 2001                                                  | 81,024 (6.1)                 | <11                        | -0.30        | 81,024 (6.1)                 | <11                          | -0.34        | 81,024 (6.1)                 | <11                       | -0.22        |
| 2002                                                  | 92,771 (7.0)                 | <11                        | -0.30        | 92,771 (7.0)                 | <11                          | -0.36        | 92,771 (7.0)                 | <11                       | -0.26        |
| 2003                                                  | 126,822 (9.6)                | 11 (1.4)                   | -0.37        | 126,822 (9.6)                | <11                          | -0.41        | 126,822 (9.6)                | <11                       | -0.32        |
| 2004                                                  | 153,523 (11.6)               | 38 (4.8)                   | -0.25        | 153,523 (11.6)               | 24 (3.6)                     | -0.31        | 153,523 (11.6)               | 35 (7.3)                  | -0.15        |
| 2005                                                  | 154,733 (11.7)               | 57 (7.2)                   | -0.16        | 154,733 (11.7)               | 62 (9.2)                     | -0.08        | 154,733 (11.7)               | 35 (7.3)                  | -0.15        |
| 2006                                                  | 154,415 (11.7)               | 94 (11.8)                  | 0.00         | 154,415 (11.7)               | 67 (10.0)                    | -0.06        | 154,415 (11.7)               | 63 (13.2)                 | 0.05         |
| 2007                                                  | 146,133 (11.0)               | 98 (12.3)                  | 0.04         | 146,133 (11.0)               | 115 (17.1)                   | 0.17         | 146,133 (11.0)               | 73 (15.3)                 | 0.13         |
| 2008                                                  | 143,246 (10.8)               | 155 (19.5)                 | 0.24         | 143,246 (10.8)               | 128 (19.0)                   | 0.23         | 143,246 (10.8)               | 70 (14.7)                 | 0.12         |
| 2009                                                  | 149,472 (11.3)               | 180 (22.6)                 | 0.31         | 149,472 (11.3)               | 151 (22.4)                   | 0.30         | 149,472 (11.3)               | 105 (22.0)                | 0.29         |
| 2010                                                  | 119,247 (9.0)                | 147 (18.5)                 | 0.28         | 119,247 (9.0)                | 117 (17.4)                   | 0.25         | 119,247 (9.0)                | 69 (14.5)                 | 0.17         |
| Multiple gestation                                    | 44,792 (3.4)                 | 31 (3.9)                   | 0.03         | 44,792 (3.4)                 | 29 (4.3)                     | 0.05         | 44,792 (3.4)                 | 23 (4.8)                  | 0.07         |
| <b>Psychiatric and neurological conditions, N (%)</b> |                              |                            |              |                              |                              |              |                              |                           |              |
| Bipolar disorder                                      | 9,485 (0.7)                  | 352 (44.3)                 | 1.22         | 9,485 (0.7)                  | 316 (47.0)                   | 1.29         | 9,485 (0.7)                  | 130 (27.3)                | 0.83         |
| Depression                                            | 63,110 (4.8)                 | 208 (26.2)                 | 0.62         | 63,110 (4.8)                 | 122 (18.1)                   | 0.43         | 63,110 (4.8)                 | 72 (15.1)                 | 0.35         |
| Anxiety                                               | 41,759 (3.2)                 | 160 (20.1)                 | 0.55         | 41,759 (3.2)                 | 118 (17.5)                   | 0.49         | 41,759 (3.2)                 | 65 (13.6)                 | 0.38         |

|                                                  |                |            |      |                |            |      |                |            |       |
|--------------------------------------------------|----------------|------------|------|----------------|------------|------|----------------|------------|-------|
| Schizophrenia                                    | 1,639 (0.1)    | 14 (1.8)   | 0.17 | 1,639 (0.1)    | <11        | 0.15 | 1,639 (0.1)    | <11        | 0.12  |
| Other psychosis                                  | 2,138 (0.2)    | 11 (1.4)   | 0.14 | 2,138 (0.2)    | <11        | 0.10 | 2,138 (0.2)    | <11        | 0.01  |
| Personality disorder                             | 2,160 (0.2)    | 32 (4.0)   | 0.27 | 2,160 (0.2)    | 28 (4.2)   | 0.28 | 2,160 (0.2)    | <11        | 0.15  |
| Adjustment disorder                              | 13,135 (1.0)   | 30 (3.8)   | 0.18 | 13,135 (1.0)   | 15 (2.2)   | 0.10 | 13,135 (1.0)   | <11        | 0.06  |
| Attention deficit hyperactivity disorder         | 10,118 (0.8)   | 71 (8.9)   | 0.39 | 10,118 (0.8)   | 48 (7.1)   | 0.33 | 10,118 (0.8)   | 14 (2.9)   | 0.16  |
| Delirium                                         | 698 (0.1)      | <11        | 0.09 | 698 (0.1)      | <11        | 0.10 | 698 (0.1)      | <11        | 0.10  |
| Other psychiatric disorders                      | 15,150 (1.1)   | 58 (7.3)   | 0.31 | 15,150 (1.1)   | 37 (5.5)   | 0.24 | 15,150 (1.1)   | 23 (4.8)   | 0.22  |
| Alcohol abuse or dependence                      | 6,754 (0.5)    | 19 (2.4)   | 0.16 | 6,754 (0.5)    | 11 (1.6)   | 0.11 | 6,754 (0.5)    | <11        | 0.06  |
| Drug abuse or dependence                         | 16,378 (1.2)   | 55 (6.9)   | 0.29 | 16,378 (1.2)   | 26 (3.9)   | 0.17 | 16,378 (1.2)   | 20 (4.2)   | 0.18  |
| Chronic fatigue syndrome                         | 36,215 (2.7)   | 52 (6.5)   | 0.18 | 36,215 (2.7)   | 52 (7.7)   | 0.23 | 36,215 (2.7)   | 20 (4.2)   | 0.08  |
| Sleep disorder                                   | 7,945 (0.6)    | 33 (4.2)   | 0.23 | 7,945 (0.6)    | 28 (4.2)   | 0.23 | 7,945 (0.6)    | 18 (3.8)   | 0.22  |
| Epilepsy or convulsions                          | 3,894 (0.3)    | 73 (9.2)   | 0.43 | 3,894 (0.3)    | 106 (15.8) | 0.59 | 3,894 (0.3)    | 205 (43.0) | 1.21  |
| Pain conditions <sup>3</sup>                     | 183,219 (13.8) | 281 (35.3) | 0.52 | 183,219 (13.8) | 232 (34.5) | 0.50 | 183,219 (13.8) | 133 (27.9) | 0.35  |
| Migraine or headache                             | 88,074 (6.7)   | 123 (15.5) | 0.28 | 88,074 (6.7)   | 106 (15.8) | 0.29 | 88,074 (6.7)   | 79 (16.6)  | 0.31  |
| <b>Chronic maternal illness, N (%)</b>           |                |            |      |                |            |      |                |            |       |
| Hypertension                                     | 24,529 (1.9)   | 36 (4.5)   | 0.15 | 24,529 (1.9)   | 25 (3.7)   | 0.11 | 24,529 (1.9)   | 18 (3.8)   | 0.12  |
| Diabetes                                         | 23,287 (1.8)   | 24 (3.0)   | 0.08 | 23,287 (1.8)   | 13 (1.9)   | 0.01 | 23,287 (1.8)   | <11        | -0.01 |
| Renal disease                                    | 3,795 (0.3)    | <11        | 0.03 | 3,795 (0.3)    | <11        | 0.08 | 3,795 (0.3)    | <11        | 0.11  |
| Obesity or overweight                            | 22,123 (1.7)   | 27 (3.4)   | 0.11 | 22,123 (1.7)   | 22 (3.3)   | 0.10 | 22,123 (1.7)   | 14 (2.9)   | 0.08  |
| Smoking                                          | 38,975 (2.9)   | 94 (11.8)  | 0.34 | 38,975 (2.9)   | 56 (8.3)   | 0.23 | 38,975 (2.9)   | 31 (6.5)   | 0.17  |
| <b>Psychotropic and other medications, N (%)</b> |                |            |      |                |            |      |                |            |       |
| Antidepressants                                  | 106,412 (8.0)  | 472 (59.4) | 1.29 | 106,412 (8.0)  | 378 (56.2) | 1.20 | 106,412 (8.0)  | 189 (39.6) | 0.80  |
| Antipsychotics                                   | 12,366 (0.9)   | 246 (30.9) | 0.90 | 12,366 (0.9)   | 233 (34.6) | 0.98 | 12,366 (0.9)   | 92 (19.3)  | 0.64  |
| Benzodiazepines                                  | 34,932 (2.6)   | 208 (26.2) | 0.71 | 34,932 (2.6)   | 185 (27.5) | 0.74 | 34,932 (2.6)   | 123 (25.8) | 0.70  |
| Other anxiolytics                                | 4,288 (0.3)    | 35 (4.4)   | 0.27 | 4,288 (0.3)    | 35 (5.2)   | 0.30 | 4,288 (0.3)    | 12 (2.5)   | 0.19  |
| Other hypnotics                                  | 43,150 (3.3)   | 155 (19.5) | 0.53 | 43,150 (3.3)   | 129 (19.2) | 0.52 | 43,150 (3.3)   | 59 (12.4)  | 0.34  |
| Barbiturates                                     | 12,269 (0.9)   | 18 (2.3)   | 0.11 | 12,269 (0.9)   | 17 (2.5)   | 0.12 | 12,269 (0.9)   | 12 (2.5)   | 0.12  |
| Stimulants                                       | 7,842 (0.6)    | 99 (12.5)  | 0.49 | 7,842 (0.6)    | 74 (11.0)  | 0.46 | 7,842 (0.6)    | 36 (7.5)   | 0.36  |
| Opioids                                          | 249,821 (18.9) | 319 (40.1) | 0.48 | 249,821 (18.9) | 261 (38.8) | 0.45 | 249,821 (18.9) | 172 (36.1) | 0.39  |

|                                                       |                |            |      |                |            |      |                |            |       |
|-------------------------------------------------------|----------------|------------|------|----------------|------------|------|----------------|------------|-------|
| Triptans                                              | 12,174 (0.9)   | 28 (3.5)   | 0.18 | 12,174 (0.9)   | 22 (3.3)   | 0.16 | 12,174 (0.9)   | 23 (4.8)   | 0.24  |
| Nonsteroidal anti-inflammatory drugs                  | 211,001 (15.9) | 220 (27.7) | 0.29 | 211,001 (15.9) | 187 (27.8) | 0.29 | 211,001 (15.9) | 103 (21.6) | 0.14  |
| Antihypertensive medications                          | 27,316 (2.1)   | 73 (9.2)   | 0.31 | 27,316 (2.1)   | 44 (6.5)   | 0.22 | 27,316 (2.1)   | 24 (5.0)   | 0.16  |
| Non-insulin antidiabetic medications                  | 8,681 (0.7)    | 16 (2.0)   | 0.12 | 8,681 (0.7)    | 15 (2.2)   | 0.13 | 8,681 (0.7)    | 11 (2.3)   | 0.14  |
| Insulin                                               | 9,554 (0.7)    | <11        | 0.04 | 9,554 (0.7)    | <11        | 0.03 | 9,554 (0.7)    | <11        | -0.01 |
| Corticosteroids                                       | 75,693 (5.7)   | 107 (13.5) | 0.26 | 75,693 (5.7)   | 72 (10.7)  | 0.18 | 75,693 (5.7)   | 47 (9.9)   | 0.15  |
| Fluconazole                                           | 22,091 (1.7)   | 37 (4.7)   | 0.17 | 22,091 (1.7)   | 27 (4.0)   | 0.14 | 22,091 (1.7)   | 17 (3.6)   | 0.12  |
| Other teratogens <sup>4</sup>                         | 16,321 (1.2)   | 19 (2.4)   | 0.09 | 16,321 (1.2)   | 27 (4.0)   | 0.17 | 16,321 (1.2)   | <11        | 0.07  |
| Methadone                                             | 595 (0.0)      | <11        | 0.09 | 595 (0.0)      | <11        | 0.06 | 595 (0.0)      | <11        | 0.05  |
| Buprenorphine                                         | 1,068 (0.1)    | <11        | 0.13 | 1,068 (0.1)    | <11        | 0.10 | 1,068 (0.1)    | <11        | 0.07  |
| Naltrexone                                            | 65 (0.0)       | <11        | 0.07 | 65 (0.0)       | <11        | 0.05 | 65 (0.0)       | <11        | 0.09  |
| Naloxone                                              | 1,215 (0.1)    | <11        | 0.12 | 1,215 (0.1)    | <11        | 0.11 | 1,215 (0.1)    | <11        | 0.06  |
| <b>Markers of burden of disease</b>                   |                |            |      |                |            |      |                |            |       |
| Obstetric Comorbidity Index <sup>45</sup> , mean (SD) | 0.9 (1.4)      | 1.5 (1.8)  | 0.36 | 0.9 (1.4)      | 1.4 (1.7)  | 0.31 | 0.9 (1.4)      | 1.2 (1.8)  | 0.22  |
| Number of distinct prescriptions, mean (SD)           | 1.6 (2.3)      | 4.4 (3.6)  | 0.94 | 1.6 (2.3)      | 4.6 (3.8)  | 0.95 | 1.6 (2.3)      | 3.5 (3.7)  | 0.62  |
| Number of diagnoses, mean (SD)                        | 2.5 (3.1)      | 5.6 (4.4)  | 0.82 | 2.5 (3.1)      | 5.5 (4.6)  | 0.77 | 2.5 (3.1)      | 5.0 (4.5)  | 0.64  |
| Number of outpatient physician visits, mean (SD)      | 2.8 (4.0)      | 7.9 (9.0)  | 0.73 | 2.8 (4.0)      | 7.6 (9.0)  | 0.69 | 2.8 (4.0)      | 6.4 (8.1)  | 0.57  |
| Patients hospitalized, N (%)                          | 48,294 (3.7)   | 53 (6.7)   | 0.14 | 48,294 (3.7)   | 33 (4.9)   | 0.06 | 48,294 (3.7)   | 29 (6.1)   | 0.11  |
| Number of hospitalizations, mean (SD)                 | 0.0 (0.2)      | 0.1 (0.3)  | 0.13 | 0.0 (0.2)      | 0.1 (0.3)  | 0.05 | 0.0 (0.2)      | 0.1 (0.3)  | 0.10  |
| Number of days hospitalized, mean (SD)                | 0.1 (0.9)      | 0.3 (1.6)  | 0.14 | 0.1 (0.9)      | 0.2 (1.3)  | 0.07 | 0.1 (0.9)      | 0.3 (1.4)  | 0.12  |
| Number of emergency room visits, mean (SD)            | 0.3 (0.8)      | 0.9 (2.6)  | 0.29 | 0.3 (0.8)      | 0.7 (1.4)  | 0.32 | 0.3 (0.8)      | 0.6 (1.5)  | 0.23  |

St. Diff.: Standardized differences, i.e., the difference in means or proportions divided by the pooled standard deviation [Austin PC. Balance diagnostics for comparing the distribution of baseline covariates between treatment groups in propensity-score matched samples. *Statistics in medicine* 2009;28:3083-107]

<sup>1</sup> In accordance with the data use agreement, we do not report information for frequency cells with less than 11 cases. These are noted as <11

<sup>2</sup> Other race includes Asian, Native American, Other, and Unknown

<sup>3</sup> Pain conditions include neuropathic and non-neuropathic conditions

<sup>4</sup> Other teratogens include methimazole, danazol, propylthiouracil, and progestins

<sup>5</sup> The obstetric comorbidity index predicts severe maternal morbidity. The range for the maternal comorbidity index is 0 to 45, with lower values associated with lower burden of maternal illness and higher values associated with higher burden of maternal illness [Bateman BT, Mhyre JM, Hernandez-Diaz S, Huybrechts KF, Fischer MA, Creanga AA, Callaghan WM, Gagne JJ. Development of a comorbidity index for use in obstetric patients. *Obstet Gynecol.* 2013;122:957-65]

**Table S13. Propensity-score-adjusted baseline characteristics of exposed and unexposed pregnant women by dose tertiles of the highest lamotrigine prescription filled during the first trimester<sup>1</sup>**

| Baseline characteristics                              | Lamotrigine                  |                            |              | Lamotrigine                  |                              |              | Lamotrigine                  |                           |              |
|-------------------------------------------------------|------------------------------|----------------------------|--------------|------------------------------|------------------------------|--------------|------------------------------|---------------------------|--------------|
|                                                       | Non-exposed<br>(N=1,099,188) | <=100<br>mg/day<br>(N=795) | St.<br>Diff. | Non-exposed<br>(N=1,254,157) | 101-200<br>mg/day<br>(N=673) | St.<br>Diff. | Non-exposed<br>(N=1,202,345) | >200<br>mg/day<br>(N=477) | St.<br>Diff. |
| Age, mean (SD)                                        | 25.0 (5.7)                   | 24.8 (5.7)                 | -0.03        | 25.4 (6.0)                   | 25.4 (5.9)                   | 0.00         | 25.2 (5.8)                   | 25.4 (5.7)                | 0.02         |
| Race                                                  |                              |                            |              |                              |                              |              |                              |                           |              |
| White                                                 | 837,896 (76.2)               | 580 (73.0)                 | -0.08        | 1,014,765 (80.9)             | 534 (79.4)                   | -0.04        | 850,727 (70.8)               | 332 (69.6)                | -0.03        |
| Black                                                 | 128,090 (11.7)               | 107 (13.5)                 | 0.05         | 128,900 (10.3)               | 73 (10.8)                    | 0.02         | 162,754 (13.5)               | 63 (13.2)                 | -0.01        |
| Hispanic                                              | 45,081 (4.1)                 | 41 (5.2)                   | 0.05         | 45,135 (3.6)                 | 29 (4.3)                     | 0.04         | 85,637 (7.1)                 | 37 (7.8)                  | 0.02         |
| Other <sup>2</sup>                                    | 88,120 (8.0)                 | 67 (8.4)                   | 0.01         | 65,357 (5.2)                 | 37 (5.5)                     | 0.01         | 103,227 (8.6)                | 45 (9.4)                  | 0.03         |
| Year                                                  |                              |                            |              |                              |                              |              |                              |                           |              |
| 2000                                                  | <11                          | <11                        | 0.00         | <11                          | <11                          | 0.00         | <11                          | <11                       | 0.00         |
| 2001                                                  | 5,460 (0.5)                  | <11                        | 0.03         | 3,912 (0.3)                  | <11                          | 0.00         | 21,743 (1.8)                 | <11                       | 0.01         |
| 2002                                                  | 10,099 (0.9)                 | <11                        | 0.02         | 4,515 (0.4)                  | <11                          | -0.01        | 22,009 (1.8)                 | <11                       | -0.01        |
| 2003                                                  | 13,106 (1.2)                 | 11 (1.4)                   | 0.02         | 10,900 (0.9)                 | <11                          | -0.01        | 29,394 (2.4)                 | <11                       | -0.02        |
| 2004                                                  | 50,260 (4.6)                 | 38 (4.8)                   | 0.01         | 46,236 (3.7)                 | 24 (3.6)                     | -0.01        | 86,401 (7.2)                 | 35 (7.3)                  | 0.01         |
| 2005                                                  | 75,052 (6.8)                 | 57 (7.2)                   | 0.01         | 110,615 (8.8)                | 62 (9.2)                     | 0.01         | 85,931 (7.1)                 | 35 (7.3)                  | 0.01         |
| 2006                                                  | 133,628 (12.2)               | 94 (11.8)                  | -0.01        | 126,797 (10.1)               | 67 (10.0)                    | -0.01        | 150,574 (12.5)               | 63 (13.2)                 | 0.02         |
| 2007                                                  | 135,243 (12.3)               | 98 (12.3)                  | 0.00         | 212,386 (16.9)               | 115 (17.1)                   | 0.00         | 180,268 (15.0)               | 73 (15.3)                 | 0.01         |
| 2008                                                  | 211,422 (19.2)               | 155 (19.5)                 | 0.01         | 242,067 (19.3)               | 128 (19.0)                   | -0.01        | 182,133 (15.1)               | 70 (14.7)                 | -0.01        |
| 2009                                                  | 257,971 (23.5)               | 180 (22.6)                 | -0.02        | 281,522 (22.4)               | 151 (22.4)                   | 0.00         | 267,694 (22.3)               | 105 (22.0)                | -0.01        |
| 2010                                                  | 206,947 (18.8)               | 147 (18.5)                 | -0.01        | 215,206 (17.2)               | 117 (17.4)                   | 0.01         | 176,199 (14.7)               | 69 (14.5)                 | -0.01        |
| Multiple gestation                                    | 43,110 (3.9)                 | 31 (3.9)                   | 0.00         | 53,911 (4.3)                 | 29 (4.3)                     | 0.00         | 57,854 (4.8)                 | 23 (4.8)                  | 0.00         |
| <b>Psychiatric and neurological conditions, N (%)</b> |                              |                            |              |                              |                              |              |                              |                           |              |
| Bipolar disorder                                      | 443,314 (40.3)               | 352 (44.3)                 | 0.08         | 581,632 (46.4)               | 316 (47.0)                   | 0.01         | 376,646 (31.3)               | 130 (27.3)                | -0.09        |
| Depression                                            | 318,714 (29.0)               | 208 (26.2)                 | -0.06        | 253,072 (20.2)               | 122 (18.1)                   | -0.05        | 188,883 (15.7)               | 72 (15.1)                 | -0.02        |
| Anxiety                                               | 233,239 (21.2)               | 160 (20.1)                 | -0.03        | 226,076 (18.0)               | 118 (17.5)                   | -0.01        | 167,178 (13.9)               | 65 (13.6)                 | -0.01        |

|                                                  |                |            |       |                |            |       |                |            |       |
|--------------------------------------------------|----------------|------------|-------|----------------|------------|-------|----------------|------------|-------|
| Schizophrenia                                    | 18,632 (1.7)   | 14 (1.8)   | 0.01  | 19,812 (1.6)   | <11        | -0.01 | 13,806 (1.1)   | <11        | -0.01 |
| Other psychosis                                  | 14,436 (1.3)   | 11 (1.4)   | 0.01  | 11,617 (0.9)   | <11        | 0.00  | 2,937 (0.2)    | <11        | -0.01 |
| Personality disorder                             | 35,067 (3.2)   | 32 (4.0)   | 0.04  | 45,027 (3.6)   | 28 (4.2)   | 0.03  | 19,415 (1.6)   | <11        | -0.01 |
| Adjustment disorder                              | 45,025 (4.1)   | 30 (3.8)   | -0.02 | 31,187 (2.5)   | 15 (2.2)   | -0.02 | 22,025 (1.8)   | <11        | -0.01 |
| Attention deficit hyperactivity disorder         | 96,645 (8.8)   | 71 (8.9)   | 0.00  | 88,658 (7.1)   | 48 (7.1)   | 0.00  | 35,597 (3.0)   | 14 (2.9)   | 0.00  |
| Delirium                                         | 5,731 (0.5)    | <11        | 0.00  | 8,144 (0.6)    | <11        | -0.01 | 8,988 (0.7)    | <11        | -0.01 |
| Other psychiatric disorders                      | 75,058 (6.8)   | 58 (7.3)   | 0.02  | 66,593 (5.3)   | 37 (5.5)   | 0.01  | 56,456 (4.7)   | 23 (4.8)   | 0.01  |
| Alcohol abuse or dependence                      | 22,794 (2.1)   | 19 (2.4)   | 0.02  | 19,356 (1.5)   | 11 (1.6)   | 0.01  | 9,716 (0.8)    | <11        | 0.03  |
| Drug abuse or dependence                         | 70,995 (6.5)   | 55 (6.9)   | 0.02  | 47,942 (3.8)   | 26 (3.9)   | 0.00  | 51,567 (4.3)   | 20 (4.2)   | 0.00  |
| Chronic fatigue syndrome                         | 74,692 (6.8)   | 52 (6.5)   | -0.01 | 101,159 (8.1)  | 52 (7.7)   | -0.01 | 55,010 (4.6)   | 20 (4.2)   | -0.02 |
| Sleep disorder                                   | 49,275 (4.5)   | 33 (4.2)   | -0.02 | 59,703 (4.8)   | 28 (4.2)   | -0.03 | 44,010 (3.7)   | 18 (3.8)   | 0.01  |
| Epilepsy or convulsions                          | 86,643 (7.9)   | 73 (9.2)   | 0.05  | 186,256 (14.9) | 106 (15.8) | 0.02  | 478,124 (39.8) | 205 (43.0) | 0.07  |
| Pain conditions <sup>3</sup>                     | 399,504 (36.3) | 281 (35.3) | -0.02 | 435,516 (34.7) | 232 (34.5) | -0.01 | 338,847 (28.2) | 133 (27.9) | -0.01 |
| Migraine or headache                             | 170,263 (15.5) | 123 (15.5) | 0.00  | 194,514 (15.5) | 106 (15.8) | 0.01  | 194,502 (16.2) | 79 (16.6)  | 0.01  |
| <b>Chronic maternal illness, N (%)</b>           |                |            |       |                |            |       |                |            |       |
| Hypertension                                     | 52,470 (4.8)   | 36 (4.5)   | -0.01 | 49,176 (3.9)   | 25 (3.7)   | -0.01 | 44,080 (3.7)   | 18 (3.8)   | 0.01  |
| Diabetes                                         | 34,852 (3.2)   | 24 (3.0)   | -0.01 | 28,119 (2.2)   | 13 (1.9)   | -0.02 | 22,573 (1.9)   | <11        | -0.02 |
| Renal disease                                    | 4,999 (0.5)    | <11        | 0.01  | 12,757 (1.0)   | <11        | -0.01 | 12,256 (1.0)   | <11        | 0.02  |
| Obesity or overweight                            | 37,326 (3.4)   | 27 (3.4)   | 0.00  | 42,352 (3.4)   | 22 (3.3)   | -0.01 | 35,618 (3.0)   | 14 (2.9)   | 0.00  |
| Smoking                                          | 128,803 (11.7) | 94 (11.8)  | 0.00  | 108,179 (8.6)  | 56 (8.3)   | -0.01 | 79,471 (6.6)   | 31 (6.5)   | 0.00  |
| <b>Psychotropic and other medications, N (%)</b> |                |            |       |                |            |       |                |            |       |
| Antidepressants                                  | 714,957 (65.0) | 472 (59.4) | -0.12 | 753,773 (60.1) | 378 (56.2) | -0.08 | 515,882 (42.9) | 189 (39.6) | -0.07 |
| Antipsychotics                                   | 302,563 (27.5) | 246 (30.9) | 0.08  | 407,636 (32.5) | 233 (34.6) | 0.04  | 261,452 (21.7) | 92 (19.3)  | -0.06 |
| Benzodiazepines                                  | 291,775 (26.5) | 208 (26.2) | -0.01 | 345,982 (27.6) | 185 (27.5) | 0.00  | 320,415 (26.6) | 123 (25.8) | -0.02 |
| Other anxiolytics                                | 45,140 (4.1)   | 35 (4.4)   | 0.01  | 62,036 (4.9)   | 35 (5.2)   | 0.01  | 33,991 (2.8)   | 12 (2.5)   | -0.02 |
| Other hypnotics                                  | 208,615 (19.0) | 155 (19.5) | 0.01  | 235,073 (18.7) | 129 (19.2) | 0.01  | 161,153 (13.4) | 59 (12.4)  | -0.03 |
| Barbiturates                                     | 26,893 (2.5)   | 18 (2.3)   | -0.01 | 31,127 (2.5)   | 17 (2.5)   | 0.00  | 26,697 (2.2)   | 12 (2.5)   | 0.02  |
| Stimulants                                       | 126,303 (11.5) | 99 (12.5)  | 0.03  | 124,603 (9.9)  | 74 (11.0)  | 0.03  | 84,682 (7.0)   | 36 (7.5)   | 0.02  |
| Opioids                                          | 456,965 (41.6) | 319 (40.1) | -0.03 | 497,227 (39.6) | 261 (38.8) | -0.02 | 444,668 (37.0) | 172 (36.1) | -0.02 |



|                                                      |                |            |       |                |            |       |                |            |       |
|------------------------------------------------------|----------------|------------|-------|----------------|------------|-------|----------------|------------|-------|
| Triptans                                             | 44,923 (4.1)   | 28 (3.5)   | -0.03 | 43,950 (3.5)   | 22 (3.3)   | -0.01 | 55,082 (4.6)   | 23 (4.8)   | 0.01  |
| Nonsteroidal anti-inflammatory drugs                 | 319,663 (29.1) | 220 (27.7) | -0.03 | 362,522 (28.9) | 187 (27.8) | -0.02 | 278,903 (23.2) | 103 (21.6) | -0.04 |
| Antihypertensive medications                         | 101,342 (9.2)  | 73 (9.2)   | 0.00  | 81,200 (6.5)   | 44 (6.5)   | 0.00  | 62,252 (5.2)   | 24 (5.0)   | -0.01 |
| Non-insulin antidiabetic medications                 | 23,981 (2.2)   | 16 (2.0)   | -0.01 | 33,568 (2.7)   | 15 (2.2)   | -0.03 | 27,374 (2.3)   | 11 (2.3)   | 0.00  |
| Insulin                                              | 13,218 (1.2)   | <11        | -0.01 | 14,238 (1.1)   | <11        | -0.01 | 9,560 (0.8)    | <11        | -0.02 |
| Corticosteroids                                      | 156,065 (14.2) | 107 (13.5) | -0.02 | 138,633 (11.1) | 72 (10.7)  | -0.01 | 116,778 (9.7)  | 47 (9.9)   | 0.00  |
| Fluconazole                                          | 54,937 (5.0)   | 37 (4.7)   | -0.02 | 53,326 (4.3)   | 27 (4.0)   | -0.01 | 44,885 (3.7)   | 17 (3.6)   | -0.01 |
| Other teratogens <sup>4</sup>                        | 27,688 (2.5)   | 19 (2.4)   | -0.01 | 52,708 (4.2)   | 27 (4.0)   | -0.01 | 24,244 (2.0)   | <11        | 0.01  |
| Methadone                                            | 5,117 (0.5)    | <11        | 0.01  | 3,891 (0.3)    | <11        | 0.00  | 3,922 (0.3)    | <11        | -0.02 |
| Buprenorphine                                        | 10,790 (1.0)   | <11        | 0.00  | 8,673 (0.7)    | <11        | 0.01  | 3,807 (0.3)    | <11        | 0.02  |
| Naltrexone                                           | 1,819 (0.2)    | <11        | 0.02  | 1,385 (0.1)    | <11        | 0.01  | 3,751 (0.3)    | <11        | 0.02  |
| Naloxone                                             | 10,752 (1.0)   | <11        | 0.00  | 9,588 (0.8)    | <11        | 0.01  | 3,681 (0.3)    | <11        | 0.02  |
| <b>Markers of burden of disease</b>                  |                |            |       |                |            |       |                |            |       |
| Obstetric Comorbidity Index <sup>5</sup> , mean (SD) | 1.5 (1.8)      | 1.5 (1.8)  | -0.01 | 1.4 (1.7)      | 1.4 (1.7)  | -0.01 | 1.2 (1.7)      | 1.2 (1.8)  | 0.02  |
| Number of distinct prescriptions, mean (SD)          | 4.6 (3.6)      | 4.4 (3.6)  | -0.05 | 4.7 (3.5)      | 4.6 (3.8)  | -0.02 | 3.6 (3.5)      | 3.5 (3.7)  | -0.01 |
| Number of diagnoses, mean (SD)                       | 5.9 (4.5)      | 5.6 (4.4)  | -0.06 | 5.7 (4.4)      | 5.5 (4.6)  | -0.04 | 5.1 (4.4)      | 5.0 (4.5)  | -0.02 |
| Number of outpatient physician visits, mean (SD)     | 7.4 (7.6)      | 7.9 (9.0)  | 0.05  | 7.2 (7.3)      | 7.6 (9.0)  | 0.05  | 6.3 (7.0)      | 6.4 (8.0)  | 0.02  |
| Patients hospitalized, N (%)                         | 68,351 (6.2)   | 53 (6.7)   | 0.02  | 63,884 (5.1)   | 33 (4.9)   | -0.01 | 73,191 (6.1)   | 29 (6.1)   | 0.00  |
| Number of hospitalizations, mean (SD)                | 0.1 (0.3)      | 0.1 (0.3)  | 0.02  | 0.1 (0.3)      | 0.1 (0.3)  | -0.01 | 0.1 (0.3)      | 0.1 (0.3)  | 0.00  |
| Number of days hospitalized, mean (SD)               | 0.3 (1.7)      | 0.3 (1.6)  | 0.01  | 0.2 (1.2)      | 0.2 (1.3)  | 0.00  | 0.3 (1.5)      | 0.3 (1.4)  | 0.00  |
| Number of emergency room visits, mean (SD)           | 0.8 (1.5)      | 0.9 (2.6)  | 0.04  | 0.7 (1.3)      | 0.7 (1.4)  | 0.01  | 0.6 (1.3)      | 0.6 (1.5)  | 0.01  |

St. Diff.: Standardized differences, i.e., the difference in means or proportions divided by the pooled standard deviation [Austin PC. Balance diagnostics for comparing the distribution of baseline covariates between treatment groups in propensity-score matched samples. Statistics in medicine 2009;28:3083-107]

<sup>1</sup> In accordance with the data use agreement, we do not report information for frequency cells with less than 11 cases. These are noted as <11

<sup>2</sup> Other race includes Asian, Native American, Other, and Unknown

<sup>3</sup> Pain conditions include neuropathic and non-neuropathic conditions

<sup>4</sup> Other teratogens include methimazole, danazol, propylthiouracil, and progestins

<sup>5</sup> The obstetric comorbidity index predicts severe maternal morbidity. The range for the maternal comorbidity index is 0 to 45, with lower values associated with lower burden of maternal illness and higher values associated with higher burden of maternal illness [Bateman BT, Mhyre JM, Hernandez-Diaz S, Huybrechts KF, Fischer MA, Creanga AA, Callaghan WM, Gagne JJ. Development of a comorbidity index for use in obstetric patients. Obstet Gynecol. 2013;122:957-65]

## **Development of study cohort and sociodemographic characteristics across sequential restriction criteria**

Our study cohort included all pregnancies in women aged 12 to 55 years that resulted in live births for which Medicaid covered the healthcare expenses. Specific eligibility criteria based on Medicaid program provisions and arrangements were implemented to increase the completeness of claim information among women included in the cohort. Montana and Connecticut were excluded because of difficulty in linking data for mothers and infants, Michigan was excluded because of incomplete data, and data from Arizona were not available. From 21,524,000 deliveries and 33,589,989 child observations, 9,157,201 pregnancies ending in live birth were available after linkage. We restricted the cohort to 1,625,491 women who were continuously eligible for Medicaid from three months before the estimated last menstrual period through one month after delivery. We also required that the linked infants met the same Medicaid eligibility criteria as their mothers for at least three months after birth, unless they died, in which case we allowed a shorter eligibility period (N=1,360,101). We excluded pregnancies with a documented chromosomal abnormality (ICD-9 code 758.xx or 759.81-759.83) and pregnancies with exposure to known teratogenic medications during the first trimester (warfarin, angiotensin converting enzyme (ACE) inhibitors, antineoplastic agents, isotretinoin, misoprostol, thalidomide). We also excluded patients exposed to anticonvulsants other than lamotrigine because of their known or possible teratogenic effects (N=1,325,563).

The Table below provides information on how the sequential restriction criteria applied to the overall Medicaid population of pregnant women affected the composition of our final study population. Both age and race remained stable across the sequence of restriction criteria (1 through 5, see table below). In line with expectations, we also observed that the proportion of low-income adults eligible independently of pregnancy increased throughout the sequence of restriction criteria, particularly when requiring continuous eligibility from 3 months before the last menstrual period (restriction criteria 4 and 5), whereas the proportion of low-income adults eligible through the occurrence of pregnancy decreased. (See table below) This may have resulted in the selection of a more disadvantaged subpopulation within Medicaid, mostly composed of low-income adults, multiparae, and women with disabilities.

The characteristics of this Medicaid-eligible population of pregnant women, i.e., young, racially diverse, and vulnerable population with a high burden of disabilities, are not expected to affect the biological relations studied. Therefore, our results should be generalizable to other populations.

**Table. Sociodemographic characteristics of study population across sequential restriction criteria**

|                                                                                                                             | Restriction criteria:          |                                   |                                            |                                                                                                                                                                                  |                                                                                                                                                                                                                                            |
|-----------------------------------------------------------------------------------------------------------------------------|--------------------------------|-----------------------------------|--------------------------------------------|----------------------------------------------------------------------------------------------------------------------------------------------------------------------------------|--------------------------------------------------------------------------------------------------------------------------------------------------------------------------------------------------------------------------------------------|
|                                                                                                                             | 1. Deliveries prior to linkage | 2. Deliveries linked to an infant | 3. Deliveries linked to a live-born infant | 4. Pregnancies eligible from 3 months before LMP to 1 month post-delivery, and no pregnancies with private insurance, restricted benefits, or with inappropriate enrollment type | 5. Pregnancies with infants eligible for $\geq 3$ months after birth, unless they died sooner, and no babies with private insurance, restricted benefits, or ineligible managed care plan during months 1 to 3 after delivery <sup>1</sup> |
|                                                                                                                             | 21,524,000                     | 9,606,196                         | 9,157,201                                  | 1,625,491                                                                                                                                                                        | 1,360,101                                                                                                                                                                                                                                  |
| Age, Mean (SD); Median (25th-75th IQR)                                                                                      | 24.9 (7.0); 23 (20-28)         | 24.4 (5.6); 23 (20-28)            | 24.5 (5.6); 23 (20-28)                     | 24.1 (5.8); 23 (20-28)                                                                                                                                                           | 24.1 (5.8); 23 (20-27)                                                                                                                                                                                                                     |
| Race                                                                                                                        |                                |                                   |                                            |                                                                                                                                                                                  |                                                                                                                                                                                                                                            |
| White                                                                                                                       | 42.6                           | 45.3                              | 45.1                                       | 39.2                                                                                                                                                                             | 40.3                                                                                                                                                                                                                                       |
| Black or African American                                                                                                   | 27.8                           | 24.9                              | 24.7                                       | 33.3                                                                                                                                                                             | 33.4                                                                                                                                                                                                                                       |
| Hispanic or Latino                                                                                                          | 19.6                           | 18.2                              | 18.4                                       | 16.1                                                                                                                                                                             | 14.6                                                                                                                                                                                                                                       |
| Other race                                                                                                                  | 10.1                           | 11.6                              | 11.8                                       | 11.5                                                                                                                                                                             | 11.7                                                                                                                                                                                                                                       |
| Medicaid eligibility criterion                                                                                              |                                |                                   |                                            |                                                                                                                                                                                  |                                                                                                                                                                                                                                            |
| Adults receiving cash assistance or eligible under section 1931, i.e. low-income adults eligible independently of pregnancy | 25.4                           | 33.3                              | 33.5                                       | 53.0                                                                                                                                                                             | 52.5                                                                                                                                                                                                                                       |
| Poverty-related eligible adults, i.e. low-income adults eligible because of pregnancy                                       | 32.1                           | 26.6                              | 26.8                                       | 6.0                                                                                                                                                                              | 6.1                                                                                                                                                                                                                                        |
| Other eligibility criterion                                                                                                 | 42.5                           | 40.0                              | 39.7                                       | 41.0                                                                                                                                                                             | 41.4                                                                                                                                                                                                                                       |

<sup>1</sup> We included data from the following states: AK, AL, AR, CA, CO, DE, FL, GA, HI, IA, ID, IL, IN, KS, KY, LA, MA, MD, ME, MN, MO, MS, NC, ND, NE, NH, NJ, NM, NV, NY, OH, OK, OR, PA, RI, SC, SD, TN, TX, UT, VA, VT, WA, WI, WV, WY

## Detailed outcome definition

Congenital malformations were defined on the basis of inpatient or outpatient ICD-9 diagnoses and procedure codes in the maternal (first month postpartum) or infant records (first three months after date of birth). (See Table below) The maternal record was considered since Medicaid claims are sometimes recorded under the mother before the infant’s eligibility has been processed. [1] We defined 13 specific malformation groups (central nervous system, ear, eye, cardiac, other vascular, respiratory, oral cleft, gastro-intestinal, genital, urinary, musculoskeletal, limb, other) and considered a specific malformation to be present if there was (i) an ICD-9 diagnosis recorded for the specific malformation on >1 date, (ii) a diagnosis on one date as well as a relevant surgery or procedure code, or (iii) a diagnosis on one date and the infant died before 90 days. If the malformation was identified using codes from the maternal record only and these codes were also present during the first 105 days of pregnancy, the outcome was excluded under the assumption that it reflected a pre-existing malformation in the mother.

**Table. Diagnostic codes for congenital malformations**

| Malformation Group                                                                                        | ICD-9 Code                                                                                                                                                  |
|-----------------------------------------------------------------------------------------------------------|-------------------------------------------------------------------------------------------------------------------------------------------------------------|
| 1. Central Nervous System defects                                                                         | 740.xx-742.xx                                                                                                                                               |
| 2. Eye anomalies                                                                                          | 743.xx (exclude if only 743.6x and 743.8x)                                                                                                                  |
| 3. Ear anomalies                                                                                          | 744.xx (exclude if only 744.1x, 744.21, 744.29, and 744.4x-744.9x)                                                                                          |
| 4. Cardiac malformations                                                                                  | 745.xx-746.xx, 747.0x-747.4x, 747.83 (exclude if only 745.5 AND preterm, 746.02 AND preterm, 746.4x, 746.6x, 746.99, 747.0x AND preterm, 747.3 AND preterm) |
| <ul style="list-style-type: none"> <li>▪ Right ventricular outflow obstruction (RVOTO) defects</li> </ul> | 746.00, 746.01, 746.02 (exclude if only 746.02 AND preterm), 746.09, 746.1x, 746.2x, 746.83, 747.3x (exclude if only 747.3x AND preterm).                   |
| 5. Vascular (non-cardiac) malformations                                                                   | 747.6x-747.9x (exclude if only 747.83)                                                                                                                      |
| 6. Respiratory malformations                                                                              | 748.xx (do not count if only 748.1x)                                                                                                                        |
| 7. Oral cleft                                                                                             | 749.xx                                                                                                                                                      |
| 8. Gastrointestinal malformations                                                                         | 750.xx-751.xx (do not count if only 750.0x, 750.1x, 750.50, 751.0x)                                                                                         |
| 9. Genital (male and female) malformations                                                                | 752.xx (do not count if only 752.42, 752.52) (in addition, do not count 752.5x if preterm)                                                                  |
| 10. Urinary malformations                                                                                 | 753.xx (do not include if only 753.7x)                                                                                                                      |
| 11. Musculoskeletal malformations                                                                         | 754.xx and 756.xx (do not count if only 754.3x, 754.81, 754.82, 756.2x)                                                                                     |
| 12. Limb defects                                                                                          | 755.xx (exclude if only 755.65)                                                                                                                             |
| 13. Other malformations                                                                                   | 757.xx; 759.xx (exclude if only 757.2-757.6, 759.81-759.83)                                                                                                 |

[1] Centers for Medicare & Medicaid Services. Medicaid Analytic eXtract (MAX) general information. MAX 1999-2005 state claims anomalies from the “2005 files” zipped file within the “MAX Data 2005 to 2008 general information, data dictionaries, data element lists, data anomalies, validation table measures and SAS loads zipped file. <http://www.cms.gov/research-statistics-data-and-systems/computer-data-and-systems/medicaiddatasourcesgeninfo/maxgeneralinformation.html>. Accessed February 7, 2017.

## Potential impact of missing terminations

Our study population only included information on pregnancies that resulted in liveborn infants. Thus, severe cardiac malformations that result in spontaneous abortions, stillbirths or pregnancy terminations for cardiac anomalies will be missed. If a depletion of affected offspring occurred preferentially among women exposed to lithium compared with unexposed women (e.g., due to differences in prenatal care and screening, or differences in the propensity to terminate a pregnancy), studies restricted to live births would underestimate relative risks of cardiac malformations associated with the use of lithium.

As previously described in detail by Huybrechts et al. [1], we used the methods proposed by Greenland and Khoury [2,3] to perform a sensitivity analysis and quantify the potential impact of missing terminations.

| Observed (with selection bias) |                |                | "Truth" (without selection bias) |                                 |                                 |
|--------------------------------|----------------|----------------|----------------------------------|---------------------------------|---------------------------------|
|                                | Case*          | Non-case       |                                  | Case*                           | Non-case                        |
| Exposed                        | A <sub>1</sub> | B <sub>1</sub> | Exposed                          | A <sub>1</sub> /S <sub>11</sub> | B <sub>1</sub> /S <sub>01</sub> |
| Unexposed                      | A <sub>0</sub> | B <sub>0</sub> | Unexposed                        | A <sub>0</sub> /S <sub>10</sub> | B <sub>0</sub> /S <sub>00</sub> |

\*: pregnancies with a cardiac malformation

A<sub>1</sub> = Total number of cases exposed

A<sub>0</sub> = Total number of cases unexposed

B<sub>1</sub> = Total number of non-cases exposed

B<sub>0</sub> = Total number of non-cases unexposed

S<sub>11</sub> = probability of case selection (survival) among exposed

S<sub>10</sub> = probability of case selection among unexposed

S<sub>01</sub> = probability of non-case selection among exposed

S<sub>00</sub> = probability of non-case selection among unexposed

The observed or apparent odds ratio (AOR) – in the presence of selection bias – is estimated as:

$$(A_1 B_0 / A_0 B_1)$$

The corrected odds ratio is estimated as:

$$[(A_1/S_{11})(B_0/S_{00})] / [(A_0/S_{10})(B_1/S_{01})] = (A_1 B_0 / A_0 B_1) * (S_{10} S_{01} / S_{11} S_{00}) = \text{AOR} * (S_{10} S_{01} / S_{11} S_{00})$$

It should be noted that bias will only occur if *both* the cardiac defect and the exposure affect pregnancy terminations; the selection probabilities would cancel out otherwise.

The assumptions used for the selection probabilities are similar to those used by Huybrechts et al. [1]:

- S<sub>00</sub>: Around 48% of pregnancies are unintended, and the proportion of unintended pregnancies ending in abortion is around 45%. [4] Only a small proportion of these terminated unintended pregnancies would carry a fetus with a major congenital malformation. Therefore, around 20% of pregnancies (slightly less than 0.48\*0.45) are terminated for reasons other than congenital malformations (e.g. social reasons). Therefore, the probability of non-case selection among unexposed (S<sub>00</sub>) was assumed to be 80% (100%-20% [terminations due to social reasons]).
- S<sub>10</sub>: Fewer than 20% of cardiac malformations are detected before 24 weeks of pregnancy, and less than 50% of those detected are terminated. [5] It has been estimated that around 10% of all pregnancies with cardiac malformations are terminated in the US. [6] Therefore, the probability of case selection among unexposed (S<sub>10</sub>) was assumed to be 70% (100% – 20% [terminations due to social reasons] – 10% [terminations due to cardiac malformations detected early]). In addition

to considering the 70% best estimate based on the literature, we also evaluated the impact of lower selection probabilities among affected pregnancies (range considered: 50-70%).

- $S_{01}, S_{11}$ : To explore the interaction of malformation status and exposure with respect to the selection probabilities, we assumed that lithium exposure would decrease the selection probability by up to 10% [7,8]. That is,  $S_{01}=S_{00}+N\%$  and  $S_{11}=S_{10}+N\%$  with N ranging from 0% to -10%.

This combination of the four selection probabilities resulted in broad ranges for the magnitude of the potential selection bias that were represented graphically. We evaluated the impact of these selection probabilities on the relative risk estimated for lithium and overall cardiac malformations compared with unexposed pregnancies in the main analysis (RR=1.65, 95% CI 1.02-2.68), after adjusting for other potential confounders via propensity score fine stratification.

The range of values for the selection probabilities considered in the sensitivity analyses are summarized in the table below:

|        | Selection probabilities                        |                                           |                                          |                                           |
|--------|------------------------------------------------|-------------------------------------------|------------------------------------------|-------------------------------------------|
|        | Pregnancies with cardiac malformations         |                                           | Pregnancies without cardiac malformation |                                           |
|        | Unexposed ( $S_{10}$ )                         | Exposed ( $S_{11}$ )                      | Unexposed ( $S_{00}$ )                   | Exposed ( $S_{01}$ )                      |
| Figure | 50-70% (70% best estimate based on literature) | $S_{10}$<br>$S_{10}$ -5%<br>$S_{10}$ -10% | 80%                                      | $S_{00}$<br>$S_{00}$ -5%<br>$S_{00}$ -10% |

The figure below shows the corrected estimate of relative risk across a range of selection probabilities (i.e., probability of being liveborn in malformed fetuses) in the unexposed. Three lines are shown, corresponding to livebirth probabilities for fetuses in the lithium-exposed group that are (1) the same as in the unexposed, (2) 5% lower than in the unexposed, and (2) 10% lower than in the unexposed. Even in the extreme scenario that the frequency of non-livebirth of a malformed fetus was 10% higher in the lithium-exposed group, the corrected RR estimate would be 1.80.

It should be noted that the selection probabilities used here are most likely conservative estimates since we adjusted for many covariates including a broad range of demographic, psychiatric and medical conditions, and healthcare utilization measures. Such adjustment would reduce not only confounding but also selection bias if the adjusted factors were common causes of lithium use and inclination to terminate (e.g. factors associated with psychiatric conditions). Thus, the relative risk estimate for lithium and cardiac malformations compared with unexposed pregnancies is unlikely to be significantly affected by the missing information on non-livebirths

**Figure. Corrected relative risk for the association between lithium exposure during the first trimester and cardiac malformations. The graph represents a range of plausible values for selection probabilities (1-probability of termination) among unexposed. The different lines represent the corrected relative risk for a range of lower selection probabilities among lithium users.**

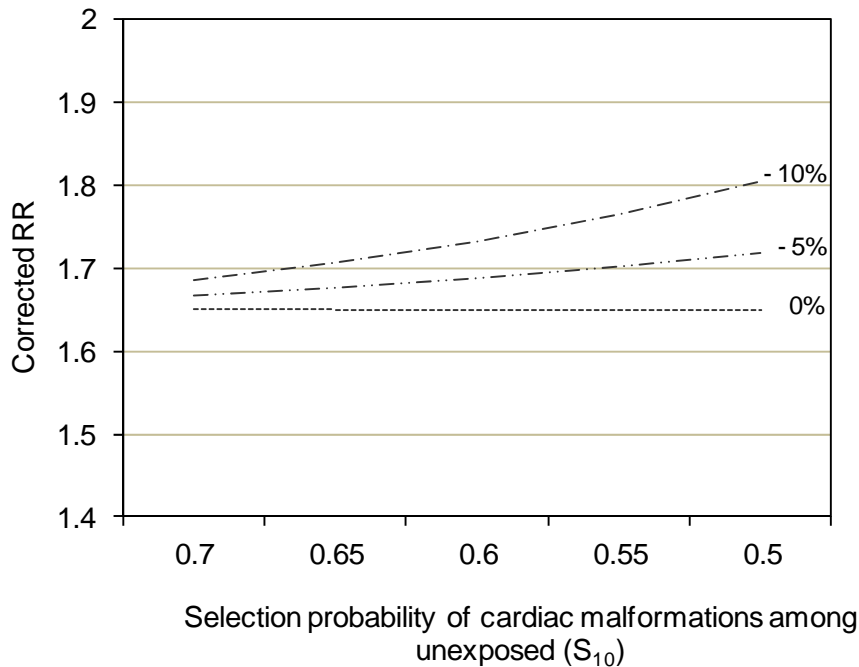

In conclusion, findings from this sensitivity analysis show that the differences in the proportion of terminations among women exposed to lithium vs. those unexposed within levels of covariates used in the adjustment would have to be unrealistically strong to meaningfully affect the relative risk estimate for lithium and cardiac malformations.

[1] Huybrechts KF, Palmsten K, Avorn J, et al. Antidepressant use in pregnancy and the risk of cardiac defects. *The New England journal of medicine* 2014;370:2397-407

[2] Greenland S. Basic methods for sensitivity analysis of biases. *International Journal of Epidemiology* 1996;25:1107-16.

[3] Khoury MJ, Flanders WD, James LM, Erickson JD. Human teratogens, prenatal mortality, and selection bias. *American Journal of Epidemiology* 1989;130:361-70

[4] Finer LB, Henshaw SK. Disparities in rates of unintended pregnancy in the United States, 1994 and 2001. *Perspectives on sexual and reproductive health* 2006;38:90-6.

[5] Trines J, Fruitman D, Zuo KJ, Smallhorn JF, Hornberger LK, Mackie AS. Effectiveness of prenatal screening for congenital heart disease: assessment in a jurisdiction with universal access to health care. *The Canadian journal of cardiology* 2013;29:879-85.

[6] Friedberg MK, Silverman NH, Moon-Grady AJ, et al. Prenatal detection of congenital heart disease. *The Journal of pediatrics* 2009;155:26-31, e1

[7] Jacobson SJ, Jones K, Johnson K, Ceolin L, Kaur P, Sahn D, Donnenfeld AE, Rieder M, Santelli R, Smythe J, et al. Prospective multicentre study of pregnancy outcome after lithium exposure during first trimester. *Lancet*. 1992;339(8792):530-3.

[8] Diav-Citrin O, Shechtman S, Tahover E, Finkel-Pekarsky V, Arnon J, Kennedy D, Erebara A, Einarson A, Ornoy A. Pregnancy outcome following in utero exposure to lithium: a prospective, comparative, observational study. *Am J Psychiatry*. 2014;171:785-94
